# Supplementary material for: GaN JBS Diode Device Performance Prediction Method Based on Neural Network
Source: MDPI journal article supplement (doi:10.3390/mi14010188), 2023-01-12
Supplement: s1 [file s1]

| Device simulation results |      |              |          |      |         |
|---------------------------|------|--------------|----------|------|---------|
| Epidop                    | L    | Impthickness | Impdop   | Ron  | BV      |
| Impdop                    |      |              |          |      |         |
| 5.00E+15                  | 0.4  | 0.4          | 1.00E+17 | 0.67 | 57.86   |
| 5.00E+15                  | 0.4  | 0.4          | 2.00E+17 | 0.85 | 97.64   |
| 5.00E+15                  | 0.4  | 0.4          | 3.00E+17 | 0.95 | 153.13  |
| 5.00E+15                  | 0.4  | 0.4          | 4.00E+17 | 1.02 | 224.20  |
| 5.00E+15                  | 0.4  | 0.4          | 5.00E+17 | 1.06 | 309.89  |
| 5.00E+15                  | 0.4  | 0.4          | 6.00E+17 | 1.09 | 400.67  |
| 5.00E+15                  | 0.4  | 0.4          | 7.00E+17 | 1.12 | 491.48  |
| 5.00E+15                  | 0.4  | 0.4          | 8.00E+17 | 1.14 | 582.33  |
| 5.00E+15                  | 0.4  | 0.4          | 9.00E+17 | 1.16 | 672.90  |
| 5.00E+15                  | 0.4  | 0.4          | 1.00E+18 | 1.18 | 762.85  |
| 5.00E+15                  | 0.4  | 0.4          | 1.50E+18 | 1.25 | 920.26  |
| 5.00E+15                  | 0.4  | 0.4          | 2.00E+18 | 1.33 | 1005.72 |
| 5.00E+15                  | 0.4  | 0.4          | 3.00E+18 | 1.37 | 1070.99 |
| 5.00E+15                  | 0.4  | 0.4          | 4.00E+18 | 1.43 | 1071.11 |
| 5.00E+15                  | 0.4  | 0.4          | 5.00E+18 | 1.49 | 1074.42 |
| Epidop                    |      |              |          |      |         |
| 1.00E+15                  | 0.4  | 0.4          | 8.00E+17 | 7.28 | 780.08  |
| 2.00E+15                  | 0.4  | 0.4          | 8.00E+17 | 3.22 | 730.54  |
| 3.00E+15                  | 0.4  | 0.4          | 8.00E+17 | 2.03 | 681.14  |
| 4.00E+15                  | 0.4  | 0.4          | 8.00E+17 | 1.47 | 631.85  |
| 5.00E+15                  | 0.4  | 0.4          | 8.00E+17 | 1.14 | 582.33  |
| 6.00E+15                  | 0.4  | 0.4          | 8.00E+17 | 0.93 | 532.91  |
| 7.00E+15                  | 0.4  | 0.4          | 8.00E+17 | 0.77 | 483.38  |
| 8.00E+15                  | 0.4  | 0.4          | 8.00E+17 | 0.65 | 435.05  |
| 9.00E+15                  | 0.4  | 0.4          | 8.00E+17 | 0.56 | 394.37  |
| 1.00E+16                  | 0.4  | 0.4          | 8.00E+17 | 0.50 | 362.50  |
| Impthickness              |      |              |          |      |         |
| 5.00E+15                  | 0.4  | 0.1          | 8.00E+17 | 0.52 | 95.54   |
| 5.00E+15                  | 0.4  | 0.15         | 8.00E+17 | 0.64 | 154.34  |
| 5.00E+15                  | 0.4  | 0.2          | 8.00E+17 | 0.73 | 231.77  |
| 5.00E+15                  | 0.4  | 0.25         | 8.00E+17 | 0.81 | 318.77  |
| 5.00E+15                  | 0.4  | 0.3          | 8.00E+17 | 0.91 | 346.26  |
| 5.00E+15                  | 0.4  | 0.35         | 8.00E+17 | 1.02 | 496.20  |
| 5.00E+15                  | 0.4  | 0.4          | 8.00E+17 | 1.14 | 582.33  |
| 5.00E+15                  | 0.4  | 0.45         | 8.00E+17 | 1.28 | 666.52  |
| 5.00E+15                  | 0.4  | 0.5          | 8.00E+17 | 1.46 | 749.92  |
| 5.00E+15                  | 0.4  | 0.55         | 8.00E+17 | 1.62 | 832.67  |
| 5.00E+15                  | 0.4  | 0.6          | 8.00E+17 | 1.90 | 913.55  |
| L                         |      |              |          |      |         |
| 5.00E+15                  | 0.15 | 0.4          | 8.00E+17 | 0.62 | 304.52  |
| 5.00E+15                  | 0.2  | 0.4          | 8.00E+17 | 0.69 | 385.08  |
| 5.00E+15                  | 0.25 | 0.4          | 8.00E+17 | 0.77 | 378.29  |
| 5.00E+15                  | 0.3  | 0.4          | 8.00E+17 | 0.88 | 463.93  |
| 5.00E+15                  | 0.35 | 0.4          | 8.00E+17 | 1.00 | 525.65  |
| 5.00E+15                  | 0.4  | 0.4          | 8.00E+17 | 1.14 | 582.33  |
| 5.00E+15                  | 0.45 | 0.4          | 8.00E+17 | 1.35 | 637.05  |
| 5.00E+15                  | 0.5  | 0.4          | 8.00E+17 | 1.61 | 913.03  |
| 5.00E+15                  | 0.55 | 0.4          | 8.00E+17 | 1.92 | 957.59  |
| 5.00E+15                  | 0.6  | 0.4          | 8.00E+17 | 2.43 | 999.29  |
| 5.00E+15                  | 0.65 | 0.4          | 8.00E+17 | 3.39 | 1039.01 |
| 5.00E+15                  | 0.7  | 0.4          | 8.00E+17 | 5.92 | 1077.01 |
