# Supplementary material for: GaN JBS Diode Device Performance Prediction Method Based on Neural Network
Source: MDPI journal article supplement (doi:10.3390/mi14010188), 2023-01-12
Supplement: s1 [file s1]

| Prediction results |           |          |          |  |           |          |          |
|--------------------|-----------|----------|----------|--|-----------|----------|----------|
| Ron                |           |          |          |  | BV        |          |          |
| TRUE               | predicted | error    | TRUE     |  | predicted | error    |          |
| 1                  | 0.982     | 0.991101 | 0.009268 |  | 335.929   | 329.0503 | 0.020477 |
| 2                  | 0.539     | 0.541153 | 0.003995 |  | 247.702   | 240.6711 | 0.028384 |
| 3                  | 0.747     | 0.739867 | 0.009549 |  | 221.04    | 211.1457 | 0.044762 |
| 4                  | 0.438     | 0.436088 | 0.004365 |  | 385.103   | 380.0013 | 0.013248 |
| 5                  | 0.776     | 0.762051 | 0.017975 |  | 111.348   | 110.6059 | 0.006664 |
| 6                  | 0.5       | 0.527214 | 0.054428 |  | 86.6467   | 91.28741 | 0.053559 |
| 7                  | 1.096     | 1.075516 | 0.01869  |  | 198.981   | 190.4914 | 0.042666 |
| 8                  | 0.316     | 0.316491 | 0.001553 |  | 178.856   | 168.5196 | 0.057792 |
| 9                  | 1.42      | 1.396853 | 0.016301 |  | 336.473   | 342.4634 | 0.017803 |
| 10                 | 1.142     | 1.112745 | 0.025617 |  | 358.271   | 364.0105 | 0.01602  |
| 11                 | 1.05      | 1.105678 | 0.053026 |  | 367.977   | 363.3814 | 0.012489 |
| 12                 | 0.821     | 0.823571 | 0.003131 |  | 208.432   | 195.4053 | 0.062498 |
| 13                 | 2.026     | 2.056604 | 0.015106 |  | 1071.6    | 1060.939 | 0.009949 |
| 14                 | 1.299     | 1.29124  | 0.005974 |  | 611.997   | 594.698  | 0.028266 |
| 15                 | 0.513     | 0.495621 | 0.033878 |  | 198.896   | 200.8339 | 0.009743 |
| 16                 | 0.906     | 0.895678 | 0.011392 |  | 321.498   | 321.493  | 1.55E-05 |
| 17                 | 0.747     | 0.717107 | 0.040018 |  | 221.04    | 212.7891 | 0.037328 |
| 18                 | 0.551     | 0.532841 | 0.032956 |  | 148.468   | 157.046  | 0.057777 |
| 19                 | 0.717     | 0.703959 | 0.018189 |  | 221.396   | 228.315  | 0.031251 |
| 20                 | 2.03      | 2.011676 | 0.009027 |  | 681.135   | 690.4211 | 0.013633 |
| 21                 | 0.318     | 0.332507 | 0.045621 |  | 78.0168   | 74.09206 | 0.050306 |
| 22                 | 0.702     | 0.731772 | 0.04241  |  | 216.327   | 201.1966 | 0.069942 |
| 23                 | 0.556     | 0.537228 | 0.033762 |  | 203.169   | 191.4513 | 0.057675 |
| 24                 | 0.896     | 0.926409 | 0.033939 |  | 287.248   | 287.9042 | 0.002284 |
| 25                 | 0.502     | 0.516075 | 0.028037 |  | 257.921   | 278.5673 | 0.080049 |
| 26                 | 0.475     | 0.477707 | 0.005699 |  | 211.29    | 202.5327 | 0.041447 |
| 27                 | 0.895     | 0.922849 | 0.031116 |  | 269.55    | 268.6092 | 0.00349  |
| 28                 | 0.669     | 0.66718  | 0.002721 |  | 85.9292   | 83.98791 | 0.022592 |
| 29                 | 0.306     | 0.303162 | 0.009273 |  | 111.041   | 120.5439 | 0.08558  |
| 30                 | 0.793     | 0.793775 | 0.000977 |  | 110.153   | 110.2959 | 0.001297 |
| 31                 | 0.719     | 0.704152 | 0.020651 |  | 107.91    | 104.5833 | 0.030828 |
| 32                 | 1.832     | 1.830312 | 0.000921 |  | 755.372   | 751.0768 | 0.005686 |
| 33                 | 0.938     | 0.929601 | 0.008955 |  | 275.115   | 265.4953 | 0.034966 |
| 34                 | 0.677     | 0.691761 | 0.021803 |  | 107.805   | 100.8415 | 0.064594 |
| 35                 | 0.384     | 0.371729 | 0.031957 |  | 77.2118   | 82.76406 | 0.071909 |
| 36                 | 1.18      | 1.176413 | 0.00304  |  | 186.985   | 185.0963 | 0.010101 |
| 37                 | 2.047     | 2.037912 | 0.00444  |  | 961.737   | 906.3742 | 0.057565 |
| 38                 | 0.818     | 0.781019 | 0.045209 |  | 215.036   | 227.3681 | 0.057349 |
| 39                 | 1.087     | 1.144483 | 0.052882 |  | 250.644   | 237.042  | 0.054268 |
| 40                 | 0.951     | 0.94314  | 0.008265 |  | 153.125   | 156.6104 | 0.022762 |
| 41                 | 0.679     | 0.669114 | 0.01456  |  | 340.709   | 329.5823 | 0.032657 |
| 42                 | 0.272     | 0.276    | 0.014706 |  | 116.316   | 108.1229 | 0.070438 |
| 43                 | 0.451     | 0.432176 | 0.041738 |  | 141.631   | 132.1104 | 0.067221 |
| 44                 | 1.144     | 1.128335 | 0.013693 |  | 457.891   | 491.1569 | 0.07265  |
| 45                 | 1.32      | 1.353126 | 0.025095 |  | 658.979   | 654.9949 | 0.006046 |
| 46                 | 0.41      | 0.430081 | 0.048977 |  | 101.292   | 111.6689 | 0.102445 |
| 47                 | 0.648     | 0.636088 | 0.018382 |  | 194.331   | 195.4488 | 0.005752 |
| 48                 | 0.447     | 0.478278 | 0.069972 |  | 142.547   | 138.6869 | 0.027079 |
| 49                 | 1.092     | 1.118242 | 0.024031 |  | 250.322   | 235.3886 | 0.059657 |
| 50                 | 1.878     | 1.818616 | 0.031621 |  | 501.664   | 501.8493 | 0.000369 |
| 51                 | 0.348     | 0.350308 | 0.006633 |  | 88.8534   | 97.8743  | 0.101526 |
| 52                 | 0.559     | 0.559691 | 0.001237 |  | 127.31    | 134.4604 | 0.056166 |
| 53                 | 0.61      | 0.61719  | 0.011786 |  | 114.085   | 113.5053 | 0.005081 |
| 54                 | 0.926     | 0.897504 | 0.030774 |  | 532.91    | 522.3433 | 0.019828 |
| 55                 | 1.366     | 1.384329 | 0.013418 |  | 359.196   | 343.0878 | 0.044845 |

|     |       |          |          |         |          |          |
|-----|-------|----------|----------|---------|----------|----------|
| 56  | 0.989 | 0.999447 | 0.010563 | 252.222 | 242.0362 | 0.040384 |
| 57  | 1.142 | 1.123847 | 0.015896 | 370.712 | 343.6704 | 0.072945 |
| 58  | 1.048 | 1.044204 | 0.003622 | 505.634 | 483.9161 | 0.042952 |
| 59  | 0.601 | 0.60219  | 0.00198  | 489.375 | 542.1236 | 0.107788 |
| 60  | 0.256 | 0.247946 | 0.031462 | 61.4453 | 57.70615 | 0.060853 |
| 61  | 0.853 | 0.859534 | 0.00766  | 346.053 | 380.3684 | 0.099162 |
| 62  | 0.627 | 0.620651 | 0.010127 | 222.422 | 203.6781 | 0.084272 |
| 63  | 0.745 | 0.721273 | 0.031848 | 393.27  | 383.7086 | 0.024313 |
| 64  | 0.58  | 0.580503 | 0.000867 | 329.714 | 330.6343 | 0.002791 |
| 65  | 0.444 | 0.442971 | 0.002318 | 88.111  | 87.8123  | 0.00339  |
| 66  | 0.531 | 0.551824 | 0.039217 | 192.723 | 184.7351 | 0.041447 |
| 67  | 1.65  | 1.664162 | 0.008583 | 491.226 | 535.4684 | 0.090065 |
| 68  | 0.414 | 0.413467 | 0.001287 | 96.6266 | 95.31779 | 0.013545 |
| 69  | 0.654 | 0.637718 | 0.024896 | 323.673 | 321.521  | 0.006649 |
| 70  | 0.496 | 0.50629  | 0.020746 | 87.6305 | 90.11517 | 0.028354 |
| 71  | 2.595 | 2.577291 | 0.006824 | 550.674 | 556.7103 | 0.010962 |
| 72  | 0.26  | 0.264041 | 0.015541 | 53.2154 | 50.39805 | 0.052942 |
| 73  | 0.777 | 0.731348 | 0.058754 | 366.592 | 328.8638 | 0.102916 |
| 74  | 0.404 | 0.403088 | 0.002258 | 77.8123 | 78.41689 | 0.00777  |
| 75  | 0.709 | 0.740604 | 0.044576 | 256.036 | 229.028  | 0.105485 |
| 76  | 1.113 | 1.106477 | 0.005861 | 244.65  | 242.722  | 0.007881 |
| 77  | 0.608 | 0.611719 | 0.006117 | 212.227 | 216.8915 | 0.021979 |
| 78  | 0.284 | 0.277793 | 0.021854 | 161.505 | 171.3843 | 0.06117  |
| 79  | 0.673 | 0.675789 | 0.004144 | 109.126 | 106.0045 | 0.028605 |
| 80  | 1.269 | 1.291716 | 0.0179   | 438.462 | 435.4919 | 0.006774 |
| 81  | 0.757 | 0.752101 | 0.006472 | 198.814 | 182.6736 | 0.081184 |
| 82  | 0.663 | 0.645054 | 0.027068 | 117.952 | 112.1975 | 0.048787 |
| 83  | 0.956 | 0.94917  | 0.007145 | 146.563 | 151.4302 | 0.033209 |
| 84  | 0.321 | 0.30158  | 0.060499 | 105.638 | 95.07143 | 0.100026 |
| 85  | 0.755 | 0.777012 | 0.029155 | 192.634 | 189.0211 | 0.018755 |
| 86  | 1.295 | 1.296039 | 0.000802 | 545.847 | 536.5557 | 0.017022 |
| 87  | 0.97  | 0.95256  | 0.017979 | 512.51  | 515.3209 | 0.005485 |
| 88  | 1.408 | 1.378986 | 0.020607 | 525.855 | 490.6813 | 0.066889 |
| 89  | 1.208 | 1.221864 | 0.011477 | 323.86  | 304.8515 | 0.058694 |
| 90  | 0.569 | 0.564966 | 0.007089 | 134.792 | 126.467  | 0.061762 |
| 91  | 1.01  | 0.979843 | 0.029859 | 443.492 | 439.7564 | 0.008423 |
| 92  | 1     | 1.017621 | 0.017621 | 308.314 | 302.317  | 0.019451 |
| 93  | 0.568 | 0.544431 | 0.041494 | 95.4735 | 99.37251 | 0.040839 |
| 94  | 1.162 | 1.142526 | 0.016759 | 458.112 | 454.9024 | 0.007006 |
| 95  | 1.362 | 1.379912 | 0.013152 | 285.067 | 283.1441 | 0.006745 |
| 96  | 0.339 | 0.364412 | 0.074962 | 141.18  | 150.5925 | 0.06667  |
| 97  | 0.723 | 0.679371 | 0.060345 | 352.924 | 382.8698 | 0.084851 |
| 98  | 0.825 | 0.839891 | 0.018049 | 223.205 | 218.9689 | 0.018979 |
| 99  | 0.738 | 0.719441 | 0.025148 | 274.31  | 264.194  | 0.036878 |
| 100 | 0.507 | 0.520194 | 0.026024 | 63.2509 | 62.86145 | 0.006157 |
| 101 | 0.548 | 0.529367 | 0.034003 | 113.87  | 110.411  | 0.030377 |
| 102 | 0.749 | 0.700811 | 0.064338 | 152.97  | 165.8765 | 0.084373 |
| 103 | 1.606 | 1.672401 | 0.041345 | 913.031 | 875.3751 | 0.041243 |
| 104 | 0.858 | 0.852108 | 0.006867 | 167.391 | 181.4247 | 0.083838 |
| 105 | 1.612 | 1.611893 | 6.63E-05 | 289.477 | 288.2725 | 0.004161 |
| 106 | 0.487 | 0.471906 | 0.030994 | 173.352 | 187.2315 | 0.080065 |
| 107 | 0.635 | 0.625434 | 0.015065 | 379.63  | 375.8858 | 0.009863 |
| 108 | 0.686 | 0.638247 | 0.06961  | 133.015 | 147.1053 | 0.10593  |
| 109 | 0.716 | 0.672972 | 0.060094 | 556.931 | 559.6444 | 0.004872 |
| 110 | 0.78  | 0.756953 | 0.029547 | 270.123 | 289.5966 | 0.072091 |
| 111 | 0.5   | 0.522991 | 0.045982 | 218.292 | 210.6914 | 0.034818 |
| 112 | 0.612 | 0.597734 | 0.02331  | 259.932 | 262.6955 | 0.010632 |
| 113 | 1.012 | 1.012968 | 0.000956 | 310.404 | 291.9817 | 0.059349 |

|     |       |          |          |         |          |          |
|-----|-------|----------|----------|---------|----------|----------|
| 114 | 0.813 | 0.78913  | 0.02936  | 318.769 | 300.0322 | 0.058779 |
| 115 | 0.952 | 0.945237 | 0.007104 | 235.278 | 240.0574 | 0.020314 |
| 116 | 0.609 | 0.587073 | 0.036005 | 112.459 | 116.8069 | 0.038662 |
| 117 | 0.698 | 0.690898 | 0.010175 | 158.345 | 144.7833 | 0.085647 |
| 118 | 1.017 | 0.992783 | 0.023813 | 353.544 | 383.0058 | 0.083333 |
| 119 | 1.409 | 1.464744 | 0.039563 | 308.111 | 337.105  | 0.094102 |
| 120 | 0.287 | 0.286299 | 0.002441 | 61.555  | 60.54248 | 0.016449 |
| 121 | 0.464 | 0.47883  | 0.031961 | 185.656 | 179.8557 | 0.031242 |
| 122 | 0.945 | 0.93176  | 0.01401  | 424.653 | 409.5806 | 0.035493 |
| 123 | 1.029 | 1.033813 | 0.004677 | 368.583 | 375.2997 | 0.018223 |
| 124 | 0.451 | 0.421668 | 0.065037 | 87.1887 | 92.17513 | 0.057191 |
| 125 | 1.277 | 1.235729 | 0.032318 | 404.125 | 412.3827 | 0.020434 |
| 126 | 0.71  | 0.722487 | 0.017587 | 181.604 | 182.4236 | 0.004513 |
| 127 | 0.807 | 0.819986 | 0.016091 | 87.681  | 88.84405 | 0.013265 |
| 128 | 0.931 | 0.923793 | 0.007741 | 441.562 | 448.2144 | 0.015066 |
| 129 | 0.44  | 0.360994 | 0.17956  | 343.177 | 320.1602 | 0.06707  |
| 130 | 0.316 | 0.316935 | 0.00296  | 82.538  | 89.76399 | 0.087547 |
| 131 | 0.719 | 0.743496 | 0.034069 | 338.464 | 318.7615 | 0.058212 |
| 132 | 0.428 | 0.423741 | 0.009952 | 77.7334 | 78.54618 | 0.010456 |
| 133 | 0.336 | 0.335599 | 0.001194 | 159.107 | 166.3184 | 0.045324 |
| 134 | 1.004 | 1.053743 | 0.049545 | 599.451 | 612.535  | 0.021827 |
| 135 | 0.651 | 0.600103 | 0.078182 | 322.079 | 355.4142 | 0.1035   |
| 136 | 0.989 | 1.023651 | 0.035037 | 634.91  | 600.184  | 0.054694 |
| 137 | 0.916 | 0.903024 | 0.014166 | 133.121 | 134.8723 | 0.013156 |
| 138 | 0.765 | 0.754399 | 0.013858 | 217.885 | 221.3864 | 0.01607  |
| 139 | 0.412 | 0.402751 | 0.022448 | 127.565 | 123.1546 | 0.034574 |
| 140 | 1.012 | 1.027016 | 0.014838 | 310.404 | 321.1942 | 0.034762 |
| 141 | 0.352 | 0.351458 | 0.001541 | 145.224 | 143.2888 | 0.013326 |
| 142 | 0.488 | 0.461697 | 0.0539   | 222.128 | 223.1132 | 0.004435 |
| 143 | 0.524 | 0.4916   | 0.061832 | 113.544 | 119.1703 | 0.049552 |
| 144 | 0.279 | 0.260673 | 0.065689 | 124.203 | 114.7369 | 0.076215 |
| 145 | 0.866 | 0.903502 | 0.043305 | 107.508 | 113.5575 | 0.05627  |
| 146 | 0.321 | 0.325788 | 0.014916 | 86.3452 | 88.67542 | 0.026987 |
| 147 | 0.833 | 0.805997 | 0.032416 | 318.115 | 318.0478 | 0.000211 |
| 148 | 0.507 | 0.528893 | 0.043182 | 107.279 | 114.4328 | 0.066684 |
| 149 | 0.381 | 0.351113 | 0.078444 | 127.742 | 116.3293 | 0.089342 |
| 150 | 1.586 | 1.612086 | 0.016447 | 499.249 | 489.5958 | 0.019335 |
| 151 | 0.783 | 0.770052 | 0.016536 | 129.468 | 126.1646 | 0.025515 |
| 152 | 0.767 | 0.708115 | 0.076773 | 210.508 | 217.9664 | 0.03543  |
| 153 | 2.217 | 2.149278 | 0.030547 | 443.064 | 516.9444 | 0.166749 |
| 154 | 0.316 | 0.40572  | 0.283924 | 100.773 | 106.8852 | 0.060653 |
| 155 | 0.538 | 0.512529 | 0.047345 | 203.05  | 209.8965 | 0.033718 |
| 156 | 0.601 | 0.577309 | 0.039419 | 245.685 | 239.3721 | 0.025695 |
| 157 | 0.932 | 0.853252 | 0.084494 | 242.243 | 238.8225 | 0.01412  |
| 158 | 0.383 | 0.363163 | 0.051794 | 97.5466 | 102.807  | 0.053927 |
| 159 | 0.599 | 0.611131 | 0.020252 | 196.462 | 216.1033 | 0.099975 |
| 160 | 0.854 | 0.831292 | 0.02659  | 345.956 | 327.0743 | 0.054578 |
| 161 | 0.462 | 0.453116 | 0.019231 | 173.488 | 171.0608 | 0.013991 |
| 162 | 0.436 | 0.42971  | 0.014426 | 162.509 | 168.1759 | 0.034872 |
| 163 | 1.129 | 1.095758 | 0.029444 | 265.312 | 258.0328 | 0.027436 |
| 164 | 0.382 | 0.368707 | 0.034798 | 50.064  | 52.54807 | 0.049618 |
| 165 | 1.284 | 1.310078 | 0.02031  | 253.156 | 254.8325 | 0.006622 |
| 166 | 0.966 | 0.932538 | 0.034639 | 402.38  | 416.1893 | 0.034319 |
| 167 | 1.176 | 1.217913 | 0.035641 | 605.547 | 591.453  | 0.023275 |
| 168 | 0.34  | 0.342867 | 0.008434 | 56.5033 | 56.6061  | 0.001819 |
| 169 | 0.412 | 0.43216  | 0.048933 | 138.144 | 131.2061 | 0.050222 |
| 170 | 0.733 | 0.682092 | 0.069452 | 424.523 | 462.6449 | 0.089799 |
| 171 | 0.616 | 0.589136 | 0.04361  | 318.669 | 327.0305 | 0.026239 |

|     |       |          |          |         |          |          |
|-----|-------|----------|----------|---------|----------|----------|
| 172 | 1.083 | 1.040718 | 0.039042 | 541.134 | 543.3161 | 0.004033 |
| 173 | 0.984 | 0.931983 | 0.052863 | 446.119 | 448.9272 | 0.006295 |
| 174 | 1.387 | 1.339953 | 0.03392  | 777.288 | 782.3271 | 0.006483 |
| 175 | 0.394 | 0.378943 | 0.038216 | 171.082 | 173.1663 | 0.012183 |
| 176 | 0.848 | 0.87448  | 0.031226 | 311.712 | 311.6346 | 0.000248 |
| 177 | 0.332 | 0.338794 | 0.020463 | 112.529 | 114.9439 | 0.02146  |
| 178 | 2.228 | 2.339775 | 0.050169 | 630.187 | 630.4189 | 0.000368 |
| 179 | 0.7   | 0.71388  | 0.019829 | 96.8939 | 92.02273 | 0.050273 |
| 180 | 2.422 | 2.459667 | 0.015552 | 537.741 | 524.1777 | 0.025223 |
| 181 | 1.172 | 1.192062 | 0.017118 | 527.532 | 507.6482 | 0.037692 |
| 182 | 0.587 | 0.584991 | 0.003423 | 146.814 | 153.8895 | 0.048194 |
| 183 | 0.323 | 0.323812 | 0.002513 | 132.685 | 130.6396 | 0.015415 |
| 184 | 0.541 | 0.563699 | 0.041958 | 88.0598 | 91.69212 | 0.041248 |
| 185 | 0.364 | 0.386188 | 0.060955 | 158.038 | 158.4926 | 0.002876 |
| 186 | 0.947 | 0.942512 | 0.004739 | 231.054 | 259.4365 | 0.122839 |
| 187 | 0.395 | 0.392095 | 0.007356 | 117.507 | 120.3733 | 0.024393 |
| 188 | 0.7   | 0.704817 | 0.006881 | 96.8939 | 107.3624 | 0.108041 |
| 189 | 0.9   | 0.91813  | 0.020145 | 294.188 | 290.6811 | 0.011921 |
| 190 | 0.721 | 0.71909  | 0.002649 | 324.742 | 306.3946 | 0.056498 |
| 191 | 0.37  | 0.375455 | 0.014743 | 120.779 | 118.0592 | 0.022519 |
| 192 | 0.49  | 0.488069 | 0.003941 | 329.108 | 325.3888 | 0.011301 |
| 193 | 0.917 | 0.875273 | 0.045503 | 323.513 | 362.4716 | 0.120423 |
| 194 | 1.175 | 1.258508 | 0.07107  | 665.68  | 664.4942 | 0.001781 |
| 195 | 0.648 | 0.656768 | 0.013531 | 178.86  | 174.9514 | 0.021853 |
| 196 | 0.388 | 0.376783 | 0.028909 | 82.7442 | 87.4276  | 0.056601 |
| 197 | 0.483 | 0.472269 | 0.022217 | 165.895 | 164.1468 | 0.010538 |
| 198 | 0.563 | 0.554967 | 0.014268 | 164.758 | 164.9511 | 0.001172 |
| 199 | 0.547 | 0.555209 | 0.015007 | 214.889 | 204.7491 | 0.047187 |
| 200 | 0.732 | 0.740774 | 0.011986 | 133.561 | 141.5016 | 0.059453 |
| 201 | 1.27  | 1.257184 | 0.010091 | 441.902 | 483.494  | 0.09412  |
| 202 | 0.623 | 0.627802 | 0.007707 | 70.2197 | 70.01908 | 0.002857 |
| 203 | 0.689 | 0.66092  | 0.040755 | 398.774 | 454.2701 | 0.139167 |
| 204 | 1.354 | 1.401325 | 0.034952 | 762.409 | 671.5208 | 0.119212 |
| 205 | 1.824 | 1.816699 | 0.004003 | 696.195 | 682.6971 | 0.019388 |
| 206 | 1.315 | 1.362565 | 0.036171 | 396.623 | 374.5396 | 0.055679 |
| 207 | 0.716 | 0.680681 | 0.049328 | 255.979 | 249.2037 | 0.026468 |
| 208 | 0.675 | 0.678333 | 0.004938 | 227.145 | 204.7477 | 0.098604 |
| 209 | 0.609 | 0.615774 | 0.011123 | 292.998 | 286.5457 | 0.022022 |
| 210 | 1.034 | 1.000981 | 0.031933 | 443.224 | 413.5657 | 0.066915 |
| 211 | 1.08  | 1.092844 | 0.011893 | 213.162 | 207.8467 | 0.024936 |
| 212 | 0.592 | 0.589996 | 0.003385 | 69.58   | 69.3325  | 0.003557 |
| 213 | 0.578 | 0.566192 | 0.02043  | 158.683 | 146.5773 | 0.076289 |
| 214 | 1.096 | 1.108644 | 0.011536 | 480.139 | 486.8732 | 0.014025 |
| 215 | 0.453 | 0.471767 | 0.041429 | 107.311 | 104.9778 | 0.021743 |
| 216 | 1.117 | 1.16016  | 0.038639 | 348.813 | 339.1931 | 0.027579 |
| 217 | 0.852 | 0.853357 | 0.001592 | 145.013 | 135.8397 | 0.063258 |
| 218 | 1.135 | 1.113764 | 0.01871  | 513.755 | 499.4235 | 0.027896 |
| 219 | 0.869 | 0.817103 | 0.059721 | 395.159 | 362.4499 | 0.082774 |
| 220 | 1.011 | 1.090495 | 0.07863  | 246.624 | 242.3983 | 0.017134 |
| 221 | 0.906 | 0.878354 | 0.030514 | 434.941 | 404.3824 | 0.070259 |
| 222 | 1.045 | 0.9647   | 0.076842 | 247.581 | 257.1786 | 0.038765 |
| 223 | 0.376 | 0.373008 | 0.007959 | 90.4016 | 100.0554 | 0.106788 |
| 224 | 1.697 | 1.773463 | 0.045058 | 586.565 | 564.0344 | 0.038411 |
| 225 | 0.607 | 0.61458  | 0.012488 | 237.546 | 234.9076 | 0.011107 |
| 226 | 0.432 | 0.418392 | 0.031499 | 246.982 | 311.4021 | 0.260829 |
| 227 | 0.922 | 0.939217 | 0.018674 | 302.898 | 327.9628 | 0.08275  |
| 228 | 1.952 | 1.9918   | 0.020389 | 950.723 | 947.9894 | 0.002875 |
| 229 | 0.93  | 0.871091 | 0.063343 | 561.655 | 493.637  | 0.121103 |

|     |       |          |          |         |          |          |
|-----|-------|----------|----------|---------|----------|----------|
| 230 | 0.721 | 0.715961 | 0.006989 | 341.292 | 336.3691 | 0.014424 |
| 231 | 0.728 | 0.710431 | 0.024133 | 235.618 | 219.52   | 0.068323 |
| 232 | 0.275 | 0.283949 | 0.032542 | 65.8019 | 73.12288 | 0.111258 |
| 233 | 0.604 | 0.571594 | 0.053652 | 208.957 | 191.9485 | 0.081397 |
| 234 | 1.066 | 1.047871 | 0.017006 | 148.97  | 145.51   | 0.023226 |
| 235 | 0.31  | 0.307457 | 0.008202 | 108.565 | 105.9055 | 0.024497 |
| 236 | 0.822 | 0.771191 | 0.061811 | 530.941 | 588.1975 | 0.10784  |
| 237 | 0.911 | 0.93377  | 0.024994 | 280.705 | 268.3181 | 0.044128 |
| 238 | 0.555 | 0.538098 | 0.030454 | 138.634 | 137.8673 | 0.005531 |
| 239 | 0.688 | 0.704683 | 0.024249 | 288.938 | 311.112  | 0.076743 |
| 240 | 0.409 | 0.414216 | 0.012753 | 109.095 | 113.6272 | 0.041544 |
| 241 | 0.908 | 0.867795 | 0.044278 | 354.881 | 365.5707 | 0.030122 |
| 242 | 1.068 | 1.045814 | 0.020774 | 484.88  | 466.07   | 0.038793 |
| 243 | 2.002 | 2.134664 | 0.066266 | 845.9   | 810.3061 | 0.042078 |
| 244 | 1.587 | 1.551478 | 0.022383 | 713.622 | 711.2258 | 0.003358 |
| 245 | 0.878 | 0.899183 | 0.024127 | 208.305 | 194.9289 | 0.064214 |
| 246 | 0.274 | 0.290593 | 0.06056  | 101.25  | 105.033  | 0.037363 |
| 247 | 0.907 | 0.877075 | 0.032994 | 161.935 | 204.0932 | 0.26034  |
| 248 | 1.257 | 1.25424  | 0.002196 | 297.789 | 252.8915 | 0.15077  |
| 249 | 0.469 | 0.478805 | 0.020905 | 153.452 | 154.9048 | 0.009468 |
| 250 | 0.637 | 0.63522  | 0.002794 | 281.652 | 269.8804 | 0.041795 |
| 251 | 1.626 | 1.615985 | 0.006159 | 826.565 | 823.6522 | 0.003524 |
| 252 | 0.553 | 0.539434 | 0.024531 | 198.285 | 212.857  | 0.07349  |
| 253 | 2.068 | 2.05422  | 0.006663 | 771.649 | 780.9459 | 0.012048 |
| 254 | 0.661 | 0.650052 | 0.016562 | 88.0801 | 101.5842 | 0.153316 |
| 255 | 1.806 | 1.803125 | 0.001592 | 675.456 | 671.6174 | 0.005683 |
| 256 | 1.16  | 1.153792 | 0.005352 | 496.754 | 488.9586 | 0.015693 |
| 257 | 0.502 | 0.505972 | 0.007913 | 101.488 | 113.4635 | 0.117999 |
| 258 | 0.562 | 0.581285 | 0.034315 | 412.303 | 385.7804 | 0.064328 |
| 259 | 0.785 | 0.73345  | 0.065669 | 340.734 | 324.7147 | 0.047014 |
| 260 | 0.758 | 0.727329 | 0.040463 | 394.645 | 447.4992 | 0.133928 |
| 261 | 0.61  | 0.623384 | 0.021941 | 351.184 | 339.3716 | 0.033636 |
| 262 | 1.142 | 1.149233 | 0.006334 | 358.271 | 378.3229 | 0.055969 |
| 263 | 1.06  | 1.075248 | 0.014385 | 347.241 | 344.1339 | 0.008948 |
| 264 | 0.888 | 0.873594 | 0.016222 | 371.33  | 352.259  | 0.051359 |
| 265 | 0.496 | 0.488973 | 0.014168 | 186.123 | 191.3002 | 0.027816 |
| 266 | 0.794 | 0.796462 | 0.003101 | 319.295 | 334.1233 | 0.046441 |
| 267 | 0.348 | 0.319687 | 0.08136  | 127.196 | 111.9376 | 0.119959 |
| 268 | 0.96  | 0.969475 | 0.00987  | 264.7   | 240.1742 | 0.092655 |
| 269 | 0.24  | 0.22678  | 0.055082 | 49.4016 | 49.33638 | 0.00132  |
| 270 | 1.407 | 1.48461  | 0.05516  | 552.675 | 497.9924 | 0.098942 |
| 271 | 0.453 | 0.444297 | 0.019213 | 204.955 | 187.124  | 0.086999 |
| 272 | 2.134 | 2.240088 | 0.049713 | 549.008 | 548.1796 | 0.001509 |
| 273 | 0.394 | 0.40797  | 0.035458 | 106.756 | 148.9021 | 0.394789 |
| 274 | 0.361 | 0.36297  | 0.005458 | 180.406 | 192.2105 | 0.065433 |
| 275 | 0.41  | 0.418413 | 0.020519 | 124.823 | 112.9078 | 0.095457 |
| 276 | 1.715 | 1.741948 | 0.015713 | 686.339 | 728.7927 | 0.061855 |
| 277 | 0.656 | 0.626488 | 0.044988 | 148.666 | 168.1995 | 0.131392 |
| 278 | 0.363 | 0.437996 | 0.2066   | 78.3514 | 83.49652 | 0.065667 |
| 279 | 1.273 | 1.278605 | 0.004403 | 486.922 | 458.0372 | 0.059321 |
| 280 | 0.615 | 0.62109  | 0.009903 | 292.744 | 258.1221 | 0.118267 |
| 281 | 0.355 | 0.348621 | 0.01797  | 60.4205 | 56.88576 | 0.058502 |
| 282 | 1.015 | 1.023179 | 0.008058 | 214.504 | 224.3645 | 0.045969 |
| 283 | 0.475 | 0.468549 | 0.013581 | 165.241 | 157.4185 | 0.04734  |
| 284 | 0.617 | 0.596552 | 0.033142 | 259.502 | 240.3746 | 0.073708 |
| 285 | 1.421 | 1.41831  | 0.001893 | 530.862 | 518.3175 | 0.023631 |
| 286 | 1.344 | 1.319484 | 0.018241 | 286.808 | 276.9933 | 0.034221 |
| 287 | 0.641 | 0.643427 | 0.003786 | 141.593 | 131.4296 | 0.071779 |

|     |       |          |                |
|-----|-------|----------|----------------|
| 288 | 0.343 | 0.329775 | 0.038556       |
| 289 | 0.44  | 0.450358 | 0.02354        |
| 290 | 0.296 | 0.304168 | 0.027596       |
| 291 | 0.489 | 0.490869 | 0.003822       |
| 292 | 0.341 | 0.359395 | 0.053943       |
| 293 | 1.503 | 1.522344 | 0.01287        |
| 294 | 0.49  | 0.514808 | 0.050628       |
| 295 | 0.459 | 0.473373 | 0.031314       |
| 296 | 0.613 | 0.601117 | 0.019386       |
| 297 | 0.571 | 0.584091 | 0.022927       |
| 298 | 0.618 | 0.593262 | 0.040029       |
| 299 | 0.66  | 0.652423 | 0.01148        |
| 300 | 0.358 | 0.402034 | 0.122999       |
| 301 | 1.05  | 1.013944 | 0.034339       |
| 302 | 0.856 | 0.866244 | 0.011968       |
|     |       |          | <b>0.02776</b> |

|         |          |                |
|---------|----------|----------------|
| 92.0634 | 91.47127 | 0.006432       |
| 182.228 | 184.3426 | 0.011604       |
| 87.3965 | 88.03594 | 0.007317       |
| 107.083 | 98.38892 | 0.08119        |
| 87.3249 | 90.59796 | 0.037481       |
| 430.836 | 379.9136 | 0.118195       |
| 60.7396 | 70.06403 | 0.153515       |
| 99.7613 | 101.011  | 0.012527       |
| 96.8439 | 94.4841  | 0.024367       |
| 82.6309 | 79.94245 | 0.032536       |
| 344.444 | 349.6313 | 0.01506        |
| 291.124 | 250.6137 | 0.139151       |
| 91.8724 | 94.10093 | 0.024257       |
| 523.825 | 554.6803 | 0.058904       |
| 148.79  | 141.233  | 0.050789       |
|         |          | <b>0.04769</b> |
