# Supplementary material for: GaN JBS Diode Device Performance Prediction Method Based on Neural Network
Source: MDPI journal article supplement (doi:10.3390/mi14010188), 2023-01-12
Supplement: s1 [file s1]

| Sample data composed of 3018 groups of data |      |              |          |       |         |
|---------------------------------------------|------|--------------|----------|-------|---------|
| Epidop                                      | L    | Impthickness | Impdop   | Ron   | BV      |
| 3.00E+15                                    | 0.2  | 0.15         | 3.00E+17 | 0.723 | 78.094  |
| 3.00E+15                                    | 0.2  | 0.15         | 4.00E+17 | 0.751 | 93.869  |
| 3.00E+15                                    | 0.2  | 0.15         | 5.00E+17 | 0.776 | 111.348 |
| 3.00E+15                                    | 0.2  | 0.15         | 6.00E+17 | 0.796 | 130.679 |
| 3.00E+15                                    | 0.2  | 0.15         | 7.00E+17 | 0.808 | 151.773 |
| 3.00E+15                                    | 0.2  | 0.15         | 8.00E+17 | 0.822 | 174.481 |
| 3.00E+15                                    | 0.2  | 0.15         | 9.00E+17 | 0.824 | 198.540 |
| 3.00E+15                                    | 0.2  | 0.15         | 1.00E+18 | 0.825 | 223.205 |
| 3.00E+15                                    | 0.2  | 0.2          | 3.00E+17 | 0.788 | 93.877  |
| 3.00E+15                                    | 0.2  | 0.2          | 4.00E+17 | 0.826 | 117.867 |
| 3.00E+15                                    | 0.2  | 0.2          | 5.00E+17 | 0.852 | 145.013 |
| 3.00E+15                                    | 0.2  | 0.2          | 6.00E+17 | 0.866 | 175.605 |
| 3.00E+15                                    | 0.2  | 0.2          | 7.00E+17 | 0.878 | 208.305 |
| 3.00E+15                                    | 0.2  | 0.2          | 8.00E+17 | 0.886 | 241.584 |
| 3.00E+15                                    | 0.2  | 0.2          | 9.00E+17 | 0.891 | 274.783 |
| 3.00E+15                                    | 0.2  | 0.2          | 1.00E+18 | 0.897 | 307.976 |
| 3.00E+15                                    | 0.2  | 0.25         | 3.00E+17 | 0.852 | 110.876 |
| 3.00E+15                                    | 0.2  | 0.25         | 4.00E+17 | 0.901 | 144.166 |
| 3.00E+15                                    | 0.2  | 0.25         | 5.00E+17 | 0.928 | 182.411 |
| 3.00E+15                                    | 0.2  | 0.25         | 6.00E+17 | 0.942 | 223.434 |
| 3.00E+15                                    | 0.2  | 0.25         | 7.00E+17 | 0.960 | 264.700 |
| 3.00E+15                                    | 0.2  | 0.25         | 8.00E+17 | 0.971 | 305.956 |
| 3.00E+15                                    | 0.2  | 0.25         | 9.00E+17 | 0.978 | 347.335 |
| 3.00E+15                                    | 0.2  | 0.25         | 1.00E+18 | 0.988 | 388.657 |
| 3.00E+15                                    | 0.2  | 0.3          | 3.00E+17 | 0.920 | 129.042 |
| 3.00E+15                                    | 0.2  | 0.3          | 4.00E+17 | 0.981 | 172.470 |
| 3.00E+15                                    | 0.2  | 0.3          | 5.00E+17 | 1.015 | 220.869 |
| 3.00E+15                                    | 0.2  | 0.3          | 6.00E+17 | 1.030 | 269.655 |
| 3.00E+15                                    | 0.2  | 0.3          | 7.00E+17 | 1.045 | 318.553 |
| 3.00E+15                                    | 0.2  | 0.3          | 8.00E+17 | 1.061 | 367.738 |
| 3.00E+15                                    | 0.2  | 0.3          | 9.00E+17 | 1.073 | 416.484 |
| 3.00E+15                                    | 0.2  | 0.3          | 1.00E+18 | 1.084 | 465.619 |
| 3.00E+15                                    | 0.2  | 0.35         | 3.00E+17 | 0.999 | 147.901 |
| 3.00E+15                                    | 0.2  | 0.35         | 4.00E+17 | 1.069 | 201.582 |
| 3.00E+15                                    | 0.2  | 0.35         | 5.00E+17 | 1.102 | 257.959 |
| 3.00E+15                                    | 0.2  | 0.35         | 6.00E+17 | 1.123 | 314.275 |
| 3.00E+15                                    | 0.2  | 0.35         | 7.00E+17 | 1.142 | 370.712 |
| 3.00E+15                                    | 0.2  | 0.35         | 8.00E+17 | 1.157 | 427.077 |
| 3.00E+15                                    | 0.2  | 0.35         | 9.00E+17 | 1.172 | 483.480 |
| 3.00E+15                                    | 0.2  | 0.35         | 1.00E+18 | 1.186 | 539.793 |
| 3.00E+15                                    | 0.2  | 0.4          | 3.00E+17 | 1.089 | 167.720 |
| 3.00E+15                                    | 0.2  | 0.4          | 4.00E+17 | 1.163 | 230.604 |
| 3.00E+15                                    | 0.2  | 0.4          | 5.00E+17 | 1.199 | 294.079 |
| 3.00E+15                                    | 0.2  | 0.4          | 6.00E+17 | 1.218 | 357.672 |
| 3.00E+15                                    | 0.2  | 0.4          | 7.00E+17 | 1.245 | 421.173 |
| 3.00E+15                                    | 0.2  | 0.4          | 8.00E+17 | 1.256 | 484.685 |
| 3.00E+15                                    | 0.2  | 0.4          | 9.00E+17 | 1.277 | 548.394 |
| 3.00E+15                                    | 0.2  | 0.4          | 1.00E+18 | 1.294 | 611.640 |
| 3.00E+15                                    | 0.25 | 0.15         | 3.00E+17 | 0.750 | 65.258  |
| 3.00E+15                                    | 0.25 | 0.15         | 4.00E+17 | 0.783 | 80.240  |
| 3.00E+15                                    | 0.25 | 0.15         | 5.00E+17 | 0.811 | 97.263  |
| 3.00E+15                                    | 0.25 | 0.15         | 6.00E+17 | 0.845 | 116.227 |
| 3.00E+15                                    | 0.25 | 0.15         | 7.00E+17 | 0.871 | 137.285 |
| 3.00E+15                                    | 0.25 | 0.15         | 8.00E+17 | 0.869 | 160.231 |
| 3.00E+15                                    | 0.25 | 0.15         | 9.00E+17 | 0.874 | 184.899 |
| 3.00E+15                                    | 0.25 | 0.15         | 1.00E+18 | 0.881 | 210.667 |

|          |      |      |          |       |         |
|----------|------|------|----------|-------|---------|
| 3.00E+15 | 0.25 | 0.2  | 3.00E+17 | 0.829 | 81.161  |
| 3.00E+15 | 0.25 | 0.2  | 4.00E+17 | 0.876 | 105.229 |
| 3.00E+15 | 0.25 | 0.2  | 5.00E+17 | 0.916 | 133.121 |
| 3.00E+15 | 0.25 | 0.2  | 6.00E+17 | 0.925 | 164.664 |
| 3.00E+15 | 0.25 | 0.2  | 7.00E+17 | 0.947 | 199.279 |
| 3.00E+15 | 0.25 | 0.2  | 8.00E+17 | 0.954 | 234.897 |
| 3.00E+15 | 0.25 | 0.2  | 9.00E+17 | 0.966 | 270.455 |
| 3.00E+15 | 0.25 | 0.2  | 1.00E+18 | 0.980 | 306.017 |
| 3.00E+15 | 0.25 | 0.25 | 3.00E+17 | 0.913 | 97.929  |
| 3.00E+15 | 0.25 | 0.25 | 4.00E+17 | 0.975 | 131.685 |
| 3.00E+15 | 0.25 | 0.25 | 5.00E+17 | 1.009 | 171.197 |
| 3.00E+15 | 0.25 | 0.25 | 6.00E+17 | 1.015 | 214.504 |
| 3.00E+15 | 0.25 | 0.25 | 7.00E+17 | 1.043 | 257.679 |
| 3.00E+15 | 0.25 | 0.25 | 8.00E+17 | 1.055 | 302.791 |
| 3.00E+15 | 0.25 | 0.25 | 9.00E+17 | 1.066 | 346.716 |
| 3.00E+15 | 0.25 | 0.25 | 1.00E+18 | 1.074 | 390.776 |
| 3.00E+15 | 0.25 | 0.3  | 3.00E+17 | 1.013 | 115.960 |
| 3.00E+15 | 0.25 | 0.3  | 4.00E+17 | 1.066 | 160.504 |
| 3.00E+15 | 0.25 | 0.3  | 5.00E+17 | 1.109 | 211.535 |
| 3.00E+15 | 0.25 | 0.3  | 6.00E+17 | 1.118 | 263.701 |
| 3.00E+15 | 0.25 | 0.3  | 7.00E+17 | 1.133 | 315.865 |
| 3.00E+15 | 0.25 | 0.3  | 8.00E+17 | 1.161 | 368.116 |
| 3.00E+15 | 0.25 | 0.3  | 9.00E+17 | 1.168 | 420.282 |
| 3.00E+15 | 0.25 | 0.3  | 1.00E+18 | 1.177 | 472.382 |
| 3.00E+15 | 0.25 | 0.35 | 3.00E+17 | 1.092 | 135.231 |
| 3.00E+15 | 0.25 | 0.35 | 4.00E+17 | 1.171 | 191.196 |
| 3.00E+15 | 0.25 | 0.35 | 5.00E+17 | 1.203 | 251.243 |
| 3.00E+15 | 0.25 | 0.35 | 6.00E+17 | 1.224 | 311.336 |
| 3.00E+15 | 0.25 | 0.35 | 7.00E+17 | 1.254 | 371.467 |
| 3.00E+15 | 0.25 | 0.35 | 8.00E+17 | 1.270 | 431.216 |
| 3.00E+15 | 0.25 | 0.35 | 9.00E+17 | 1.279 | 491.325 |
| 3.00E+15 | 0.25 | 0.35 | 1.00E+18 | 1.299 | 551.279 |
| 3.00E+15 | 0.25 | 0.4  | 3.00E+17 | 1.204 | 155.882 |
| 3.00E+15 | 0.25 | 0.4  | 4.00E+17 | 1.290 | 222.293 |
| 3.00E+15 | 0.25 | 0.4  | 5.00E+17 | 1.326 | 289.972 |
| 3.00E+15 | 0.25 | 0.4  | 6.00E+17 | 1.346 | 357.850 |
| 3.00E+15 | 0.25 | 0.4  | 7.00E+17 | 1.369 | 425.628 |
| 3.00E+15 | 0.25 | 0.4  | 8.00E+17 | 1.403 | 493.351 |
| 3.00E+15 | 0.25 | 0.4  | 9.00E+17 | 1.421 | 561.039 |
| 3.00E+15 | 0.25 | 0.4  | 1.00E+18 | 1.447 | 628.612 |
| 3.00E+15 | 0.3  | 0.15 | 3.00E+17 | 0.770 | 70.066  |
| 3.00E+15 | 0.3  | 0.15 | 4.00E+17 | 0.807 | 87.681  |
| 3.00E+15 | 0.3  | 0.15 | 5.00E+17 | 0.864 | 107.877 |
| 3.00E+15 | 0.3  | 0.15 | 6.00E+17 | 0.899 | 130.568 |
| 3.00E+15 | 0.3  | 0.15 | 7.00E+17 | 0.913 | 155.729 |
| 3.00E+15 | 0.3  | 0.15 | 8.00E+17 | 0.933 | 183.124 |
| 3.00E+15 | 0.3  | 0.15 | 9.00E+17 | 0.942 | 211.824 |
| 3.00E+15 | 0.3  | 0.15 | 1.00E+18 | 0.955 | 240.758 |
| 3.00E+15 | 0.3  | 0.2  | 3.00E+17 | 0.870 | 88.669  |
| 3.00E+15 | 0.3  | 0.2  | 4.00E+17 | 0.953 | 117.196 |
| 3.00E+15 | 0.3  | 0.2  | 5.00E+17 | 0.987 | 150.394 |
| 3.00E+15 | 0.3  | 0.2  | 6.00E+17 | 1.006 | 187.795 |
| 3.00E+15 | 0.3  | 0.2  | 7.00E+17 | 1.021 | 230.656 |
| 3.00E+15 | 0.3  | 0.2  | 8.00E+17 | 1.038 | 266.832 |
| 3.00E+15 | 0.3  | 0.2  | 9.00E+17 | 1.057 | 306.344 |
| 3.00E+15 | 0.3  | 0.2  | 1.00E+18 | 1.070 | 346.056 |
| 3.00E+15 | 0.3  | 0.25 | 3.00E+17 | 0.985 | 108.647 |
| 3.00E+15 | 0.3  | 0.25 | 4.00E+17 | 1.066 | 148.970 |

|          |      |      |          |       |         |
|----------|------|------|----------|-------|---------|
| 3.00E+15 | 0.3  | 0.25 | 5.00E+17 | 1.096 | 198.981 |
| 3.00E+15 | 0.3  | 0.25 | 6.00E+17 | 1.113 | 244.650 |
| 3.00E+15 | 0.3  | 0.25 | 7.00E+17 | 1.139 | 297.477 |
| 3.00E+15 | 0.3  | 0.25 | 8.00E+17 | 1.158 | 342.773 |
| 3.00E+15 | 0.3  | 0.25 | 9.00E+17 | 1.166 | 391.806 |
| 3.00E+15 | 0.3  | 0.25 | 1.00E+18 | 1.178 | 445.348 |
| 3.00E+15 | 0.3  | 0.3  | 3.00E+17 | 1.100 | 133.092 |
| 3.00E+15 | 0.3  | 0.3  | 4.00E+17 | 1.180 | 186.985 |
| 3.00E+15 | 0.3  | 0.3  | 5.00E+17 | 1.208 | 245.409 |
| 3.00E+15 | 0.3  | 0.3  | 6.00E+17 | 1.233 | 300.109 |
| 3.00E+15 | 0.3  | 0.3  | 7.00E+17 | 1.264 | 362.391 |
| 3.00E+15 | 0.3  | 0.3  | 8.00E+17 | 1.277 | 404.125 |
| 3.00E+15 | 0.3  | 0.3  | 9.00E+17 | 1.289 | 445.322 |
| 3.00E+15 | 0.3  | 0.3  | 1.00E+18 | 1.299 | 537.702 |
| 3.00E+15 | 0.3  | 0.35 | 3.00E+17 | 1.222 | 154.168 |
| 3.00E+15 | 0.3  | 0.35 | 4.00E+17 | 1.309 | 219.770 |
| 3.00E+15 | 0.3  | 0.35 | 5.00E+17 | 1.344 | 286.808 |
| 3.00E+15 | 0.3  | 0.35 | 6.00E+17 | 1.371 | 358.174 |
| 3.00E+15 | 0.3  | 0.35 | 7.00E+17 | 1.393 | 425.612 |
| 3.00E+15 | 0.3  | 0.35 | 8.00E+17 | 1.420 | 492.993 |
| 3.00E+15 | 0.3  | 0.35 | 9.00E+17 | 1.436 | 555.480 |
| 3.00E+15 | 0.3  | 0.35 | 1.00E+18 | 1.462 | 627.795 |
| 3.00E+15 | 0.3  | 0.4  | 3.00E+17 | 1.345 | 182.483 |
| 3.00E+15 | 0.3  | 0.4  | 4.00E+17 | 1.441 | 254.972 |
| 3.00E+15 | 0.3  | 0.4  | 5.00E+17 | 1.486 | 334.832 |
| 3.00E+15 | 0.3  | 0.4  | 6.00E+17 | 1.527 | 411.086 |
| 3.00E+15 | 0.3  | 0.4  | 7.00E+17 | 1.551 | 482.684 |
| 3.00E+15 | 0.3  | 0.4  | 8.00E+17 | 1.583 | 563.505 |
| 3.00E+15 | 0.3  | 0.4  | 9.00E+17 | 1.619 | 639.651 |
| 3.00E+15 | 0.3  | 0.4  | 1.00E+18 | 1.627 | 715.196 |
| 3.00E+15 | 0.35 | 0.15 | 3.00E+17 | 0.796 | 75.992  |
| 3.00E+15 | 0.35 | 0.15 | 4.00E+17 | 0.846 | 96.491  |
| 3.00E+15 | 0.35 | 0.15 | 5.00E+17 | 0.914 | 120.024 |
| 3.00E+15 | 0.35 | 0.15 | 6.00E+17 | 0.956 | 146.563 |
| 3.00E+15 | 0.35 | 0.15 | 7.00E+17 | 0.981 | 175.959 |
| 3.00E+15 | 0.35 | 0.15 | 8.00E+17 | 1.002 | 207.293 |
| 3.00E+15 | 0.35 | 0.15 | 9.00E+17 | 1.021 | 239.047 |
| 3.00E+15 | 0.35 | 0.15 | 1.00E+18 | 1.033 | 270.693 |
| 3.00E+15 | 0.35 | 0.2  | 3.00E+17 | 0.925 | 97.944  |
| 3.00E+15 | 0.35 | 0.2  | 4.00E+17 | 1.024 | 131.333 |
| 3.00E+15 | 0.35 | 0.2  | 5.00E+17 | 1.056 | 170.271 |
| 3.00E+15 | 0.35 | 0.2  | 6.00E+17 | 1.080 | 213.162 |
| 3.00E+15 | 0.35 | 0.2  | 7.00E+17 | 1.107 | 256.624 |
| 3.00E+15 | 0.35 | 0.2  | 8.00E+17 | 1.129 | 300.073 |
| 3.00E+15 | 0.35 | 0.2  | 9.00E+17 | 1.142 | 343.498 |
| 3.00E+15 | 0.35 | 0.2  | 1.00E+18 | 1.154 | 387.069 |
| 3.00E+15 | 0.35 | 0.25 | 3.00E+17 | 1.039 | 121.818 |
| 3.00E+15 | 0.35 | 0.25 | 4.00E+17 | 1.140 | 169.313 |
| 3.00E+15 | 0.35 | 0.25 | 5.00E+17 | 1.180 | 222.709 |
| 3.00E+15 | 0.35 | 0.25 | 6.00E+17 | 1.218 | 276.566 |
| 3.00E+15 | 0.35 | 0.25 | 7.00E+17 | 1.247 | 330.634 |
| 3.00E+15 | 0.35 | 0.25 | 8.00E+17 | 1.266 | 384.685 |
| 3.00E+15 | 0.35 | 0.25 | 9.00E+17 | 1.269 | 438.462 |
| 3.00E+15 | 0.35 | 0.25 | 1.00E+18 | 1.281 | 492.048 |
| 3.00E+15 | 0.35 | 0.3  | 3.00E+17 | 1.188 | 148.051 |
| 3.00E+15 | 0.35 | 0.3  | 4.00E+17 | 1.286 | 210.052 |
| 3.00E+15 | 0.35 | 0.3  | 5.00E+17 | 1.321 | 274.211 |
| 3.00E+15 | 0.35 | 0.3  | 6.00E+17 | 1.358 | 338.421 |

|          |      |      |          |       |         |
|----------|------|------|----------|-------|---------|
| 3.00E+15 | 0.35 | 0.3  | 7.00E+17 | 1.391 | 402.594 |
| 3.00E+15 | 0.35 | 0.3  | 8.00E+17 | 1.402 | 466.774 |
| 3.00E+15 | 0.35 | 0.3  | 9.00E+17 | 1.421 | 530.862 |
| 3.00E+15 | 0.35 | 0.3  | 1.00E+18 | 1.445 | 593.629 |
| 3.00E+15 | 0.35 | 0.35 | 3.00E+17 | 1.334 | 176.360 |
| 3.00E+15 | 0.35 | 0.35 | 4.00E+17 | 1.437 | 250.232 |
| 3.00E+15 | 0.35 | 0.35 | 5.00E+17 | 1.495 | 324.204 |
| 3.00E+15 | 0.35 | 0.35 | 6.00E+17 | 1.528 | 398.267 |
| 3.00E+15 | 0.35 | 0.35 | 7.00E+17 | 1.551 | 472.532 |
| 3.00E+15 | 0.35 | 0.35 | 8.00E+17 | 1.588 | 546.480 |
| 3.00E+15 | 0.35 | 0.35 | 9.00E+17 | 1.620 | 620.531 |
| 3.00E+15 | 0.35 | 0.35 | 1.00E+18 | 1.638 | 694.493 |
| 3.00E+15 | 0.35 | 0.4  | 3.00E+17 | 1.497 | 205.689 |
| 3.00E+15 | 0.35 | 0.4  | 4.00E+17 | 1.612 | 289.477 |
| 3.00E+15 | 0.35 | 0.4  | 5.00E+17 | 1.677 | 373.356 |
| 3.00E+15 | 0.35 | 0.4  | 6.00E+17 | 1.718 | 457.307 |
| 3.00E+15 | 0.35 | 0.4  | 7.00E+17 | 1.758 | 541.155 |
| 3.00E+15 | 0.35 | 0.4  | 8.00E+17 | 1.800 | 625.017 |
| 3.00E+15 | 0.35 | 0.4  | 9.00E+17 | 1.832 | 708.593 |
| 3.00E+15 | 0.35 | 0.4  | 1.00E+18 | 1.843 | 791.839 |
| 3.00E+15 | 0.4  | 0.15 | 3.00E+17 | 0.819 | 80.126  |
| 3.00E+15 | 0.4  | 0.15 | 4.00E+17 | 0.886 | 103.098 |
| 3.00E+15 | 0.4  | 0.15 | 5.00E+17 | 0.972 | 129.651 |
| 3.00E+15 | 0.4  | 0.15 | 6.00E+17 | 1.028 | 159.658 |
| 3.00E+15 | 0.4  | 0.15 | 7.00E+17 | 1.065 | 192.663 |
| 3.00E+15 | 0.4  | 0.15 | 8.00E+17 | 1.089 | 226.829 |
| 3.00E+15 | 0.4  | 0.15 | 9.00E+17 | 1.103 | 260.903 |
| 3.00E+15 | 0.4  | 0.15 | 1.00E+18 | 1.112 | 294.691 |
| 3.00E+15 | 0.4  | 0.2  | 3.00E+17 | 0.989 | 104.776 |
| 3.00E+15 | 0.4  | 0.2  | 4.00E+17 | 1.092 | 142.385 |
| 3.00E+15 | 0.4  | 0.2  | 5.00E+17 | 1.145 | 186.243 |
| 3.00E+15 | 0.4  | 0.2  | 6.00E+17 | 1.183 | 232.929 |
| 3.00E+15 | 0.4  | 0.2  | 7.00E+17 | 1.212 | 279.662 |
| 3.00E+15 | 0.4  | 0.2  | 8.00E+17 | 1.225 | 326.527 |
| 3.00E+15 | 0.4  | 0.2  | 9.00E+17 | 1.246 | 373.351 |
| 3.00E+15 | 0.4  | 0.2  | 1.00E+18 | 1.259 | 420.041 |
| 3.00E+15 | 0.4  | 0.25 | 3.00E+17 | 1.167 | 131.951 |
| 3.00E+15 | 0.4  | 0.25 | 4.00E+17 | 1.254 | 185.632 |
| 3.00E+15 | 0.4  | 0.25 | 5.00E+17 | 1.302 | 243.832 |
| 3.00E+15 | 0.4  | 0.25 | 6.00E+17 | 1.345 | 302.048 |
| 3.00E+15 | 0.4  | 0.25 | 7.00E+17 | 1.365 | 360.152 |
| 3.00E+15 | 0.4  | 0.25 | 8.00E+17 | 1.388 | 418.526 |
| 3.00E+15 | 0.4  | 0.25 | 9.00E+17 | 1.404 | 476.613 |
| 3.00E+15 | 0.4  | 0.25 | 1.00E+18 | 1.417 | 534.859 |
| 3.00E+15 | 0.4  | 0.3  | 3.00E+17 | 1.338 | 162.049 |
| 3.00E+15 | 0.4  | 0.3  | 4.00E+17 | 1.407 | 230.595 |
| 3.00E+15 | 0.4  | 0.3  | 5.00E+17 | 1.485 | 299.675 |
| 3.00E+15 | 0.4  | 0.3  | 6.00E+17 | 1.507 | 369.300 |
| 3.00E+15 | 0.4  | 0.3  | 7.00E+17 | 1.526 | 438.571 |
| 3.00E+15 | 0.4  | 0.3  | 8.00E+17 | 1.557 | 507.861 |
| 3.00E+15 | 0.4  | 0.3  | 9.00E+17 | 1.595 | 577.164 |
| 3.00E+15 | 0.4  | 0.3  | 1.00E+18 | 1.619 | 646.503 |
| 3.00E+15 | 0.4  | 0.35 | 3.00E+17 | 1.493 | 194.319 |
| 3.00E+15 | 0.4  | 0.35 | 4.00E+17 | 1.583 | 274.570 |
| 3.00E+15 | 0.4  | 0.35 | 5.00E+17 | 1.678 | 354.824 |
| 3.00E+15 | 0.4  | 0.35 | 6.00E+17 | 1.697 | 435.021 |
| 3.00E+15 | 0.4  | 0.35 | 7.00E+17 | 1.738 | 515.254 |
| 3.00E+15 | 0.4  | 0.35 | 8.00E+17 | 1.783 | 595.412 |

|          |      |      |          |       |         |
|----------|------|------|----------|-------|---------|
| 3.00E+15 | 0.4  | 0.35 | 9.00E+17 | 1.806 | 675.456 |
| 3.00E+15 | 0.4  | 0.35 | 1.00E+18 | 1.832 | 755.372 |
| 3.00E+15 | 0.4  | 0.4  | 3.00E+17 | 1.674 | 226.881 |
| 3.00E+15 | 0.4  | 0.4  | 4.00E+17 | 1.798 | 317.811 |
| 3.00E+15 | 0.4  | 0.4  | 5.00E+17 | 1.899 | 408.660 |
| 3.00E+15 | 0.4  | 0.4  | 6.00E+17 | 1.934 | 499.562 |
| 3.00E+15 | 0.4  | 0.4  | 7.00E+17 | 1.999 | 590.359 |
| 3.00E+15 | 0.4  | 0.4  | 8.00E+17 | 2.030 | 681.135 |
| 3.00E+15 | 0.4  | 0.4  | 9.00E+17 | 2.068 | 771.649 |
| 3.00E+15 | 0.4  | 0.4  | 1.00E+18 | 2.122 | 861.666 |
| 3.00E+15 | 0.45 | 0.15 | 3.00E+17 | 0.841 | 84.522  |
| 3.00E+15 | 0.45 | 0.15 | 4.00E+17 | 0.925 | 110.166 |
| 3.00E+15 | 0.45 | 0.15 | 5.00E+17 | 1.029 | 139.828 |
| 3.00E+15 | 0.45 | 0.15 | 6.00E+17 | 1.095 | 173.472 |
| 3.00E+15 | 0.45 | 0.15 | 7.00E+17 | 1.147 | 209.707 |
| 3.00E+15 | 0.45 | 0.15 | 8.00E+17 | 1.163 | 246.336 |
| 3.00E+15 | 0.45 | 0.15 | 9.00E+17 | 1.182 | 282.901 |
| 3.00E+15 | 0.45 | 0.15 | 1.00E+18 | 1.195 | 319.598 |
| 3.00E+15 | 0.45 | 0.2  | 3.00E+17 | 1.054 | 112.218 |
| 3.00E+15 | 0.45 | 0.2  | 4.00E+17 | 1.170 | 154.453 |
| 3.00E+15 | 0.45 | 0.2  | 5.00E+17 | 1.240 | 203.048 |
| 3.00E+15 | 0.45 | 0.2  | 6.00E+17 | 1.284 | 253.156 |
| 3.00E+15 | 0.45 | 0.2  | 7.00E+17 | 1.310 | 303.344 |
| 3.00E+15 | 0.45 | 0.2  | 8.00E+17 | 1.334 | 353.475 |
| 3.00E+15 | 0.45 | 0.2  | 9.00E+17 | 1.368 | 403.622 |
| 3.00E+15 | 0.45 | 0.2  | 1.00E+18 | 1.383 | 453.681 |
| 3.00E+15 | 0.45 | 0.25 | 3.00E+17 | 1.263 | 142.896 |
| 3.00E+15 | 0.45 | 0.25 | 4.00E+17 | 1.364 | 202.575 |
| 3.00E+15 | 0.45 | 0.25 | 5.00E+17 | 1.441 | 264.967 |
| 3.00E+15 | 0.45 | 0.25 | 6.00E+17 | 1.466 | 327.427 |
| 3.00E+15 | 0.45 | 0.25 | 7.00E+17 | 1.515 | 389.793 |
| 3.00E+15 | 0.45 | 0.25 | 8.00E+17 | 1.547 | 452.275 |
| 3.00E+15 | 0.45 | 0.25 | 9.00E+17 | 1.569 | 514.596 |
| 3.00E+15 | 0.45 | 0.25 | 1.00E+18 | 1.592 | 576.952 |
| 3.00E+15 | 0.45 | 0.3  | 3.00E+17 | 1.455 | 176.949 |
| 3.00E+15 | 0.45 | 0.3  | 4.00E+17 | 1.562 | 251.108 |
| 3.00E+15 | 0.45 | 0.3  | 5.00E+17 | 1.655 | 325.541 |
| 3.00E+15 | 0.45 | 0.3  | 6.00E+17 | 1.692 | 399.982 |
| 3.00E+15 | 0.45 | 0.3  | 7.00E+17 | 1.729 | 474.234 |
| 3.00E+15 | 0.45 | 0.3  | 8.00E+17 | 1.773 | 548.583 |
| 3.00E+15 | 0.45 | 0.3  | 9.00E+17 | 1.812 | 623.021 |
| 3.00E+15 | 0.45 | 0.3  | 1.00E+18 | 1.833 | 697.344 |
| 3.00E+15 | 0.45 | 0.35 | 3.00E+17 | 1.664 | 212.492 |
| 3.00E+15 | 0.45 | 0.35 | 4.00E+17 | 1.797 | 298.609 |
| 3.00E+15 | 0.45 | 0.35 | 5.00E+17 | 1.909 | 384.707 |
| 3.00E+15 | 0.45 | 0.35 | 6.00E+17 | 1.948 | 470.755 |
| 3.00E+15 | 0.45 | 0.35 | 7.00E+17 | 2.012 | 527.283 |
| 3.00E+15 | 0.45 | 0.35 | 8.00E+17 | 2.055 | 642.916 |
| 3.00E+15 | 0.45 | 0.35 | 9.00E+17 | 2.094 | 728.836 |
| 3.00E+15 | 0.45 | 0.35 | 1.00E+18 | 2.129 | 814.579 |
| 3.00E+15 | 0.45 | 0.4  | 3.00E+17 | 1.900 | 247.562 |
| 3.00E+15 | 0.45 | 0.4  | 4.00E+17 | 2.075 | 345.298 |
| 3.00E+15 | 0.45 | 0.4  | 5.00E+17 | 2.217 | 443.064 |
| 3.00E+15 | 0.45 | 0.4  | 6.00E+17 | 2.252 | 540.655 |
| 3.00E+15 | 0.45 | 0.4  | 7.00E+17 | 2.334 | 638.239 |
| 3.00E+15 | 0.45 | 0.4  | 8.00E+17 | 2.397 | 735.878 |
| 3.00E+15 | 0.45 | 0.4  | 9.00E+17 | 2.458 | 833.177 |
| 3.00E+15 | 0.45 | 0.4  | 1.00E+18 | 2.523 | 929.550 |

|          |     |      |          |       |         |
|----------|-----|------|----------|-------|---------|
| 3.00E+15 | 0.5 | 0.15 | 3.00E+17 | 0.866 | 187.510 |
| 3.00E+15 | 0.5 | 0.15 | 4.00E+17 | 0.957 | 225.432 |
| 3.00E+15 | 0.5 | 0.15 | 5.00E+17 | 1.087 | 250.644 |
| 3.00E+15 | 0.5 | 0.15 | 6.00E+17 | 1.174 | 268.855 |
| 3.00E+15 | 0.5 | 0.15 | 7.00E+17 | 1.239 | 364.250 |
| 3.00E+15 | 0.5 | 0.15 | 8.00E+17 | 1.261 | 407.956 |
| 3.00E+15 | 0.5 | 0.15 | 9.00E+17 | 1.293 | 420.863 |
| 3.00E+15 | 0.5 | 0.15 | 1.00E+18 | 1.312 | 495.827 |
| 3.00E+15 | 0.5 | 0.2  | 3.00E+17 | 1.109 | 238.043 |
| 3.00E+15 | 0.5 | 0.2  | 4.00E+17 | 1.257 | 297.789 |
| 3.00E+15 | 0.5 | 0.2  | 5.00E+17 | 1.369 | 357.959 |
| 3.00E+15 | 0.5 | 0.2  | 6.00E+17 | 1.407 | 417.121 |
| 3.00E+15 | 0.5 | 0.2  | 7.00E+17 | 1.453 | 477.739 |
| 3.00E+15 | 0.5 | 0.2  | 8.00E+17 | 1.479 | 537.170 |
| 3.00E+15 | 0.5 | 0.2  | 9.00E+17 | 1.505 | 597.186 |
| 3.00E+15 | 0.5 | 0.2  | 1.00E+18 | 1.524 | 657.226 |
| 3.00E+15 | 0.5 | 0.25 | 3.00E+17 | 1.362 | 285.067 |
| 3.00E+15 | 0.5 | 0.25 | 4.00E+17 | 1.493 | 360.253 |
| 3.00E+15 | 0.5 | 0.25 | 5.00E+17 | 1.612 | 435.454 |
| 3.00E+15 | 0.5 | 0.25 | 6.00E+17 | 1.653 | 511.416 |
| 3.00E+15 | 0.5 | 0.25 | 7.00E+17 | 1.697 | 586.565 |
| 3.00E+15 | 0.5 | 0.25 | 8.00E+17 | 1.727 | 662.222 |
| 3.00E+15 | 0.5 | 0.25 | 9.00E+17 | 1.766 | 737.264 |
| 3.00E+15 | 0.5 | 0.25 | 1.00E+18 | 1.799 | 811.957 |
| 3.00E+15 | 0.5 | 0.3  | 3.00E+17 | 1.605 | 308.308 |
| 3.00E+15 | 0.5 | 0.3  | 4.00E+17 | 1.742 | 420.627 |
| 3.00E+15 | 0.5 | 0.3  | 5.00E+17 | 1.896 | 511.526 |
| 3.00E+15 | 0.5 | 0.3  | 6.00E+17 | 1.923 | 601.975 |
| 3.00E+15 | 0.5 | 0.3  | 7.00E+17 | 1.978 | 534.049 |
| 3.00E+15 | 0.5 | 0.3  | 8.00E+17 | 2.039 | 782.572 |
| 3.00E+15 | 0.5 | 0.3  | 9.00E+17 | 2.087 | 871.778 |
| 3.00E+15 | 0.5 | 0.3  | 1.00E+18 | 2.117 | 959.612 |
| 3.00E+15 | 0.5 | 0.35 | 3.00E+17 | 1.878 | 374.727 |
| 3.00E+15 | 0.5 | 0.35 | 4.00E+17 | 2.053 | 479.815 |
| 3.00E+15 | 0.5 | 0.35 | 5.00E+17 | 2.249 | 585.136 |
| 3.00E+15 | 0.5 | 0.35 | 6.00E+17 | 2.269 | 690.445 |
| 3.00E+15 | 0.5 | 0.35 | 7.00E+17 | 2.356 | 794.921 |
| 3.00E+15 | 0.5 | 0.4  | 3.00E+17 | 2.195 | 418.292 |
| 3.00E+15 | 0.5 | 0.4  | 4.00E+17 | 2.422 | 537.741 |
| 3.00E+15 | 0.5 | 0.4  | 5.00E+17 | 2.666 | 657.195 |
| 3.00E+15 | 0.5 | 0.4  | 6.00E+17 | 2.708 | 776.619 |
| 3.00E+15 | 0.5 | 0.4  | 7.00E+17 | 2.792 | 894.610 |
| 3.00E+15 | 0.6 | 0.15 | 3.00E+17 | 0.919 | 199.380 |
| 3.00E+15 | 0.6 | 0.15 | 4.00E+17 | 1.011 | 246.624 |
| 3.00E+15 | 0.6 | 0.15 | 5.00E+17 | 1.221 | 293.680 |
| 3.00E+15 | 0.6 | 0.15 | 6.00E+17 | 1.376 | 336.399 |
| 3.00E+15 | 0.6 | 0.15 | 7.00E+17 | 1.476 | 370.067 |
| 3.00E+15 | 0.6 | 0.15 | 8.00E+17 | 1.544 | 390.304 |
| 3.00E+15 | 0.6 | 0.15 | 9.00E+17 | 1.570 | 408.676 |
| 3.00E+15 | 0.6 | 0.15 | 1.00E+18 | 1.601 | 426.697 |
| 3.00E+15 | 0.6 | 0.2  | 3.00E+17 | 1.263 | 252.455 |
| 3.00E+15 | 0.6 | 0.2  | 4.00E+17 | 1.489 | 316.829 |
| 3.00E+15 | 0.6 | 0.2  | 5.00E+17 | 1.672 | 381.252 |
| 3.00E+15 | 0.6 | 0.2  | 6.00E+17 | 1.766 | 446.240 |
| 3.00E+15 | 0.6 | 0.2  | 7.00E+17 | 1.817 | 459.681 |
| 3.00E+15 | 0.6 | 0.2  | 8.00E+17 | 1.872 | 480.117 |
| 3.00E+15 | 0.6 | 0.2  | 9.00E+17 | 1.915 | 506.748 |
| 3.00E+15 | 0.6 | 0.2  | 1.00E+18 | 1.959 | 530.208 |

|          |     |      |          |       |         |
|----------|-----|------|----------|-------|---------|
| 3.00E+15 | 0.6 | 0.25 | 3.00E+17 | 1.679 | 303.976 |
| 3.00E+15 | 0.6 | 0.25 | 4.00E+17 | 1.895 | 385.190 |
| 3.00E+15 | 0.6 | 0.25 | 5.00E+17 | 2.113 | 467.030 |
| 3.00E+15 | 0.6 | 0.25 | 6.00E+17 | 2.134 | 549.008 |
| 3.00E+15 | 0.6 | 0.25 | 7.00E+17 | 2.228 | 630.187 |
| 3.00E+15 | 0.6 | 0.25 | 8.00E+17 | 2.298 | 711.966 |
| 3.00E+15 | 0.6 | 0.3  | 3.00E+17 | 2.072 | 354.690 |
| 3.00E+15 | 0.6 | 0.3  | 4.00E+17 | 2.343 | 444.536 |
| 3.00E+15 | 0.6 | 0.3  | 5.00E+17 | 2.595 | 550.674 |
| 3.00E+15 | 0.6 | 0.3  | 6.00E+17 | 2.697 | 648.603 |
| 3.00E+15 | 0.6 | 0.3  | 7.00E+17 | 2.813 | 746.983 |
| 3.00E+15 | 0.6 | 0.3  | 8.00E+17 | 2.918 | 844.623 |
| 3.00E+15 | 0.6 | 0.35 | 3.00E+17 | 2.553 | 403.007 |
| 3.00E+15 | 0.6 | 0.35 | 4.00E+17 | 2.904 | 518.030 |
| 3.00E+15 | 0.6 | 0.35 | 5.00E+17 | 3.306 | 599.039 |
| 3.00E+15 | 0.6 | 0.35 | 6.00E+17 | 3.428 | 746.434 |
| 3.00E+15 | 0.6 | 0.35 | 7.00E+17 | 3.554 | 860.172 |
| 3.00E+15 | 0.6 | 0.35 | 8.00E+17 | 3.670 | 972.689 |
| 3.00E+15 | 0.6 | 0.4  | 3.00E+17 | 3.150 | 451.424 |
| 3.00E+15 | 0.6 | 0.4  | 4.00E+17 | 3.665 | 581.712 |
| 5.00E+15 | 0.2 | 0.15 | 3.00E+17 | 0.445 | 63.032  |
| 5.00E+15 | 0.2 | 0.15 | 4.00E+17 | 0.457 | 73.613  |
| 5.00E+15 | 0.2 | 0.15 | 5.00E+17 | 0.469 | 84.628  |
| 5.00E+15 | 0.2 | 0.15 | 6.00E+17 | 0.478 | 96.283  |
| 5.00E+15 | 0.2 | 0.15 | 7.00E+17 | 0.485 | 109.063 |
| 5.00E+15 | 0.2 | 0.15 | 8.00E+17 | 0.490 | 122.927 |
| 5.00E+15 | 0.2 | 0.15 | 9.00E+17 | 0.493 | 137.907 |
| 5.00E+15 | 0.2 | 0.15 | 1.00E+18 | 0.498 | 154.091 |
| 5.00E+15 | 0.2 | 0.2  | 3.00E+17 | 0.480 | 73.506  |
| 5.00E+15 | 0.2 | 0.2  | 4.00E+17 | 0.493 | 88.427  |
| 5.00E+15 | 0.2 | 0.2  | 5.00E+17 | 0.505 | 104.852 |
| 5.00E+15 | 0.2 | 0.2  | 6.00E+17 | 0.512 | 123.104 |
| 5.00E+15 | 0.2 | 0.2  | 7.00E+17 | 0.517 | 142.775 |
| 5.00E+15 | 0.2 | 0.2  | 8.00E+17 | 0.521 | 161.783 |
| 5.00E+15 | 0.2 | 0.2  | 9.00E+17 | 0.525 | 191.296 |
| 5.00E+15 | 0.2 | 0.2  | 1.00E+18 | 0.528 | 217.400 |
| 5.00E+15 | 0.2 | 0.25 | 3.00E+17 | 0.508 | 84.080  |
| 5.00E+15 | 0.2 | 0.25 | 4.00E+17 | 0.522 | 104.093 |
| 5.00E+15 | 0.2 | 0.25 | 5.00E+17 | 0.535 | 127.347 |
| 5.00E+15 | 0.2 | 0.25 | 6.00E+17 | 0.544 | 153.829 |
| 5.00E+15 | 0.2 | 0.25 | 7.00E+17 | 0.548 | 183.157 |
| 5.00E+15 | 0.2 | 0.25 | 8.00E+17 | 0.556 | 215.859 |
| 5.00E+15 | 0.2 | 0.25 | 9.00E+17 | 0.559 | 251.315 |
| 5.00E+15 | 0.2 | 0.25 | 1.00E+18 | 0.563 | 287.259 |
| 5.00E+15 | 0.2 | 0.3  | 3.00E+17 | 0.535 | 94.675  |
| 5.00E+15 | 0.2 | 0.3  | 4.00E+17 | 0.556 | 121.016 |
| 5.00E+15 | 0.2 | 0.3  | 5.00E+17 | 0.576 | 151.830 |
| 5.00E+15 | 0.2 | 0.3  | 6.00E+17 | 0.582 | 187.124 |
| 5.00E+15 | 0.2 | 0.3  | 7.00E+17 | 0.589 | 226.439 |
| 5.00E+15 | 0.2 | 0.3  | 8.00E+17 | 0.598 | 269.922 |
| 5.00E+15 | 0.2 | 0.3  | 9.00E+17 | 0.604 | 314.415 |
| 5.00E+15 | 0.2 | 0.3  | 1.00E+18 | 0.608 | 365.844 |
| 5.00E+15 | 0.2 | 0.35 | 3.00E+17 | 0.564 | 105.728 |
| 5.00E+15 | 0.2 | 0.35 | 4.00E+17 | 0.591 | 138.743 |
| 5.00E+15 | 0.2 | 0.35 | 5.00E+17 | 0.613 | 177.616 |
| 5.00E+15 | 0.2 | 0.35 | 6.00E+17 | 0.626 | 205.440 |
| 5.00E+15 | 0.2 | 0.35 | 7.00E+17 | 0.635 | 272.512 |
| 5.00E+15 | 0.2 | 0.35 | 8.00E+17 | 0.642 | 327.458 |

|          |      |      |          |       |         |
|----------|------|------|----------|-------|---------|
| 5.00E+15 | 0.2  | 0.35 | 9.00E+17 | 0.650 | 383.517 |
| 5.00E+15 | 0.2  | 0.35 | 1.00E+18 | 0.655 | 439.612 |
| 5.00E+15 | 0.2  | 0.4  | 3.00E+17 | 0.599 | 117.472 |
| 5.00E+15 | 0.2  | 0.4  | 4.00E+17 | 0.639 | 157.767 |
| 5.00E+15 | 0.2  | 0.4  | 5.00E+17 | 0.659 | 205.666 |
| 5.00E+15 | 0.2  | 0.4  | 6.00E+17 | 0.669 | 258.366 |
| 5.00E+15 | 0.2  | 0.4  | 7.00E+17 | 0.681 | 321.865 |
| 5.00E+15 | 0.2  | 0.4  | 8.00E+17 | 0.688 | 385.078 |
| 5.00E+15 | 0.2  | 0.4  | 9.00E+17 | 0.695 | 448.370 |
| 5.00E+15 | 0.2  | 0.4  | 1.00E+18 | 0.705 | 511.836 |
| 5.00E+15 | 0.25 | 0.15 | 3.00E+17 | 0.458 | 53.554  |
| 5.00E+15 | 0.25 | 0.15 | 4.00E+17 | 0.474 | 64.090  |
| 5.00E+15 | 0.25 | 0.15 | 5.00E+17 | 0.489 | 75.076  |
| 5.00E+15 | 0.25 | 0.15 | 6.00E+17 | 0.500 | 86.647  |
| 5.00E+15 | 0.25 | 0.15 | 7.00E+17 | 0.509 | 99.266  |
| 5.00E+15 | 0.25 | 0.15 | 8.00E+17 | 0.513 | 113.100 |
| 5.00E+15 | 0.25 | 0.15 | 9.00E+17 | 0.518 | 128.324 |
| 5.00E+15 | 0.25 | 0.15 | 1.00E+18 | 0.523 | 144.648 |
| 5.00E+15 | 0.25 | 0.2  | 3.00E+17 | 0.493 | 64.639  |
| 5.00E+15 | 0.25 | 0.2  | 4.00E+17 | 0.519 | 79.869  |
| 5.00E+15 | 0.25 | 0.2  | 5.00E+17 | 0.535 | 96.588  |
| 5.00E+15 | 0.25 | 0.2  | 6.00E+17 | 0.551 | 115.679 |
| 5.00E+15 | 0.25 | 0.2  | 7.00E+17 | 0.552 | 137.087 |
| 5.00E+15 | 0.25 | 0.2  | 8.00E+17 | 0.557 | 160.865 |
| 5.00E+15 | 0.25 | 0.2  | 9.00E+17 | 0.563 | 186.927 |
| 5.00E+15 | 0.25 | 0.2  | 1.00E+18 | 0.566 | 215.145 |
| 5.00E+15 | 0.25 | 0.25 | 3.00E+17 | 0.541 | 75.159  |
| 5.00E+15 | 0.25 | 0.25 | 4.00E+17 | 0.568 | 95.474  |
| 5.00E+15 | 0.25 | 0.25 | 5.00E+17 | 0.582 | 119.308 |
| 5.00E+15 | 0.25 | 0.25 | 6.00E+17 | 0.587 | 146.814 |
| 5.00E+15 | 0.25 | 0.25 | 7.00E+17 | 0.596 | 177.732 |
| 5.00E+15 | 0.25 | 0.25 | 8.00E+17 | 0.608 | 212.227 |
| 5.00E+15 | 0.25 | 0.25 | 9.00E+17 | 0.615 | 226.627 |
| 5.00E+15 | 0.25 | 0.25 | 1.00E+18 | 0.623 | 247.421 |
| 5.00E+15 | 0.25 | 0.3  | 3.00E+17 | 0.579 | 85.725  |
| 5.00E+15 | 0.25 | 0.3  | 4.00E+17 | 0.609 | 112.459 |
| 5.00E+15 | 0.25 | 0.3  | 5.00E+17 | 0.630 | 144.405 |
| 5.00E+15 | 0.25 | 0.3  | 6.00E+17 | 0.633 | 181.245 |
| 5.00E+15 | 0.25 | 0.3  | 7.00E+17 | 0.652 | 222.983 |
| 5.00E+15 | 0.25 | 0.3  | 8.00E+17 | 0.651 | 269.528 |
| 5.00E+15 | 0.25 | 0.3  | 9.00E+17 | 0.664 | 320.317 |
| 5.00E+15 | 0.25 | 0.3  | 1.00E+18 | 0.667 | 372.432 |
| 5.00E+15 | 0.25 | 0.35 | 3.00E+17 | 0.613 | 96.844  |
| 5.00E+15 | 0.25 | 0.35 | 4.00E+17 | 0.657 | 130.871 |
| 5.00E+15 | 0.25 | 0.35 | 5.00E+17 | 0.675 | 171.640 |
| 5.00E+15 | 0.25 | 0.35 | 6.00E+17 | 0.686 | 218.994 |
| 5.00E+15 | 0.25 | 0.35 | 7.00E+17 | 0.701 | 272.763 |
| 5.00E+15 | 0.25 | 0.35 | 8.00E+17 | 0.710 | 331.708 |
| 5.00E+15 | 0.25 | 0.35 | 9.00E+17 | 0.721 | 391.681 |
| 5.00E+15 | 0.25 | 0.35 | 1.00E+18 | 0.728 | 451.718 |
| 5.00E+15 | 0.25 | 0.4  | 3.00E+17 | 0.657 | 108.874 |
| 5.00E+15 | 0.25 | 0.4  | 4.00E+17 | 0.709 | 150.927 |
| 5.00E+15 | 0.25 | 0.4  | 5.00E+17 | 0.723 | 201.351 |
| 5.00E+15 | 0.25 | 0.4  | 6.00E+17 | 0.745 | 260.095 |
| 5.00E+15 | 0.25 | 0.4  | 7.00E+17 | 0.760 | 326.020 |
| 5.00E+15 | 0.25 | 0.4  | 8.00E+17 | 0.770 | 378.293 |
| 5.00E+15 | 0.25 | 0.4  | 9.00E+17 | 0.783 | 461.321 |
| 5.00E+15 | 0.25 | 0.4  | 1.00E+18 | 0.789 | 528.884 |



|          |      |      |          |       |         |
|----------|------|------|----------|-------|---------|
| 5.00E+15 | 0.3  | 0.15 | 3.00E+17 | 0.472 | 56.818  |
| 5.00E+15 | 0.3  | 0.15 | 4.00E+17 | 0.493 | 68.678  |
| 5.00E+15 | 0.3  | 0.15 | 5.00E+17 | 0.513 | 81.192  |
| 5.00E+15 | 0.3  | 0.15 | 6.00E+17 | 0.528 | 94.786  |
| 5.00E+15 | 0.3  | 0.15 | 7.00E+17 | 0.539 | 109.893 |
| 5.00E+15 | 0.3  | 0.15 | 8.00E+17 | 0.548 | 126.764 |
| 5.00E+15 | 0.3  | 0.15 | 9.00E+17 | 0.556 | 144.987 |
| 5.00E+15 | 0.3  | 0.15 | 1.00E+18 | 0.563 | 164.758 |
| 5.00E+15 | 0.3  | 0.2  | 3.00E+17 | 0.521 | 69.245  |
| 5.00E+15 | 0.3  | 0.2  | 4.00E+17 | 0.556 | 86.582  |
| 5.00E+15 | 0.3  | 0.2  | 5.00E+17 | 0.578 | 106.436 |
| 5.00E+15 | 0.3  | 0.2  | 6.00E+17 | 0.582 | 129.413 |
| 5.00E+15 | 0.3  | 0.2  | 7.00E+17 | 0.592 | 155.264 |
| 5.00E+15 | 0.3  | 0.2  | 8.00E+17 | 0.606 | 183.826 |
| 5.00E+15 | 0.3  | 0.2  | 9.00E+17 | 0.616 | 215.157 |
| 5.00E+15 | 0.3  | 0.2  | 1.00E+18 | 0.617 | 249.317 |
| 5.00E+15 | 0.3  | 0.25 | 3.00E+17 | 0.571 | 82.631  |
| 5.00E+15 | 0.3  | 0.25 | 4.00E+17 | 0.618 | 107.025 |
| 5.00E+15 | 0.3  | 0.25 | 5.00E+17 | 0.630 | 134.036 |
| 5.00E+15 | 0.3  | 0.25 | 6.00E+17 | 0.642 | 169.749 |
| 5.00E+15 | 0.3  | 0.25 | 7.00E+17 | 0.656 | 204.656 |
| 5.00E+15 | 0.3  | 0.25 | 8.00E+17 | 0.670 | 250.007 |
| 5.00E+15 | 0.3  | 0.25 | 9.00E+17 | 0.673 | 292.209 |
| 5.00E+15 | 0.3  | 0.25 | 1.00E+18 | 0.679 | 340.709 |
| 5.00E+15 | 0.3  | 0.3  | 3.00E+17 | 0.621 | 94.079  |
| 5.00E+15 | 0.3  | 0.3  | 4.00E+17 | 0.673 | 126.346 |
| 5.00E+15 | 0.3  | 0.3  | 5.00E+17 | 0.691 | 167.563 |
| 5.00E+15 | 0.3  | 0.3  | 6.00E+17 | 0.707 | 209.635 |
| 5.00E+15 | 0.3  | 0.3  | 7.00E+17 | 0.725 | 264.292 |
| 5.00E+15 | 0.3  | 0.3  | 8.00E+17 | 0.731 | 316.806 |
| 5.00E+15 | 0.3  | 0.3  | 9.00E+17 | 0.737 | 379.499 |
| 5.00E+15 | 0.3  | 0.3  | 1.00E+18 | 0.748 | 433.028 |
| 5.00E+15 | 0.3  | 0.35 | 3.00E+17 | 0.677 | 107.805 |
| 5.00E+15 | 0.3  | 0.35 | 4.00E+17 | 0.736 | 149.199 |
| 5.00E+15 | 0.3  | 0.35 | 5.00E+17 | 0.757 | 198.814 |
| 5.00E+15 | 0.3  | 0.35 | 6.00E+17 | 0.774 | 256.632 |
| 5.00E+15 | 0.3  | 0.35 | 7.00E+17 | 0.792 | 326.011 |
| 5.00E+15 | 0.3  | 0.35 | 8.00E+17 | 0.801 | 388.596 |
| 5.00E+15 | 0.3  | 0.35 | 9.00E+17 | 0.813 | 460.751 |
| 5.00E+15 | 0.3  | 0.35 | 1.00E+18 | 0.823 | 527.976 |
| 5.00E+15 | 0.3  | 0.4  | 3.00E+17 | 0.740 | 122.740 |
| 5.00E+15 | 0.3  | 0.4  | 4.00E+17 | 0.805 | 176.656 |
| 5.00E+15 | 0.3  | 0.4  | 5.00E+17 | 0.826 | 239.303 |
| 5.00E+15 | 0.3  | 0.4  | 6.00E+17 | 0.848 | 311.712 |
| 5.00E+15 | 0.3  | 0.4  | 7.00E+17 | 0.866 | 383.137 |
| 5.00E+15 | 0.3  | 0.4  | 8.00E+17 | 0.880 | 463.926 |
| 5.00E+15 | 0.3  | 0.4  | 9.00E+17 | 0.896 | 534.580 |
| 5.00E+15 | 0.3  | 0.4  | 1.00E+18 | 0.908 | 615.786 |
| 5.00E+15 | 0.35 | 0.15 | 3.00E+17 | 0.490 | 60.740  |
| 5.00E+15 | 0.35 | 0.15 | 4.00E+17 | 0.515 | 73.914  |
| 5.00E+15 | 0.35 | 0.15 | 5.00E+17 | 0.541 | 88.060  |
| 5.00E+15 | 0.35 | 0.15 | 6.00E+17 | 0.564 | 103.878 |
| 5.00E+15 | 0.35 | 0.15 | 7.00E+17 | 0.579 | 121.911 |
| 5.00E+15 | 0.35 | 0.15 | 8.00E+17 | 0.591 | 141.553 |
| 5.00E+15 | 0.35 | 0.15 | 9.00E+17 | 0.599 | 163.140 |
| 5.00E+15 | 0.35 | 0.15 | 1.00E+18 | 0.607 | 186.581 |
| 5.00E+15 | 0.35 | 0.2  | 3.00E+17 | 0.548 | 74.689  |
| 5.00E+15 | 0.35 | 0.2  | 4.00E+17 | 0.601 | 94.672  |

|          |      |      |          |       |         |
|----------|------|------|----------|-------|---------|
| 5.00E+15 | 0.35 | 0.2  | 5.00E+17 | 0.624 | 118.212 |
| 5.00E+15 | 0.35 | 0.2  | 6.00E+17 | 0.631 | 145.330 |
| 5.00E+15 | 0.35 | 0.2  | 7.00E+17 | 0.650 | 175.822 |
| 5.00E+15 | 0.35 | 0.2  | 8.00E+17 | 0.658 | 209.753 |
| 5.00E+15 | 0.35 | 0.2  | 9.00E+17 | 0.666 | 247.042 |
| 5.00E+15 | 0.35 | 0.2  | 1.00E+18 | 0.665 | 287.491 |
| 5.00E+15 | 0.35 | 0.25 | 3.00E+17 | 0.614 | 88.771  |
| 5.00E+15 | 0.35 | 0.25 | 4.00E+17 | 0.670 | 117.380 |
| 5.00E+15 | 0.35 | 0.25 | 5.00E+17 | 0.684 | 151.571 |
| 5.00E+15 | 0.35 | 0.25 | 6.00E+17 | 0.703 | 190.847 |
| 5.00E+15 | 0.35 | 0.25 | 7.00E+17 | 0.728 | 235.618 |
| 5.00E+15 | 0.35 | 0.25 | 8.00E+17 | 0.735 | 285.344 |
| 5.00E+15 | 0.35 | 0.25 | 9.00E+17 | 0.747 | 338.688 |
| 5.00E+15 | 0.35 | 0.25 | 1.00E+18 | 0.752 | 392.490 |
| 5.00E+15 | 0.35 | 0.3  | 3.00E+17 | 0.686 | 104.087 |
| 5.00E+15 | 0.35 | 0.3  | 4.00E+17 | 0.746 | 142.688 |
| 5.00E+15 | 0.35 | 0.3  | 5.00E+17 | 0.763 | 188.780 |
| 5.00E+15 | 0.35 | 0.3  | 6.00E+17 | 0.785 | 242.560 |
| 5.00E+15 | 0.35 | 0.3  | 7.00E+17 | 0.801 | 303.162 |
| 5.00E+15 | 0.35 | 0.3  | 8.00E+17 | 0.815 | 367.152 |
| 5.00E+15 | 0.35 | 0.3  | 9.00E+17 | 0.817 | 431.280 |
| 5.00E+15 | 0.35 | 0.3  | 1.00E+18 | 0.827 | 495.388 |
| 5.00E+15 | 0.35 | 0.35 | 3.00E+17 | 0.766 | 120.981 |
| 5.00E+15 | 0.35 | 0.35 | 4.00E+17 | 0.823 | 170.426 |
| 5.00E+15 | 0.35 | 0.35 | 5.00E+17 | 0.851 | 230.054 |
| 5.00E+15 | 0.35 | 0.35 | 6.00E+17 | 0.880 | 299.346 |
| 5.00E+15 | 0.35 | 0.35 | 7.00E+17 | 0.887 | 373.263 |
| 5.00E+15 | 0.35 | 0.35 | 8.00E+17 | 0.904 | 447.152 |
| 5.00E+15 | 0.35 | 0.35 | 9.00E+17 | 0.920 | 521.035 |
| 5.00E+15 | 0.35 | 0.35 | 1.00E+18 | 0.931 | 594.977 |
| 5.00E+15 | 0.35 | 0.4  | 3.00E+17 | 0.840 | 139.198 |
| 5.00E+15 | 0.35 | 0.4  | 4.00E+17 | 0.912 | 200.677 |
| 5.00E+15 | 0.35 | 0.4  | 5.00E+17 | 0.938 | 275.115 |
| 5.00E+15 | 0.35 | 0.4  | 6.00E+17 | 0.966 | 358.240 |
| 5.00E+15 | 0.35 | 0.4  | 7.00E+17 | 0.979 | 441.982 |
| 5.00E+15 | 0.35 | 0.4  | 8.00E+17 | 0.998 | 525.654 |
| 5.00E+15 | 0.35 | 0.4  | 9.00E+17 | 1.021 | 609.305 |
| 5.00E+15 | 0.35 | 0.4  | 1.00E+18 | 1.032 | 690.417 |
| 5.00E+15 | 0.4  | 0.15 | 3.00E+17 | 0.507 | 63.251  |
| 5.00E+15 | 0.4  | 0.15 | 4.00E+17 | 0.537 | 77.537  |
| 5.00E+15 | 0.4  | 0.15 | 5.00E+17 | 0.577 | 93.406  |
| 5.00E+15 | 0.4  | 0.15 | 6.00E+17 | 0.608 | 111.484 |
| 5.00E+15 | 0.4  | 0.15 | 7.00E+17 | 0.628 | 131.746 |
| 5.00E+15 | 0.4  | 0.15 | 8.00E+17 | 0.644 | 154.340 |
| 5.00E+15 | 0.4  | 0.15 | 9.00E+17 | 0.648 | 178.860 |
| 5.00E+15 | 0.4  | 0.15 | 1.00E+18 | 0.659 | 205.590 |
| 5.00E+15 | 0.4  | 0.2  | 3.00E+17 | 0.584 | 78.415  |
| 5.00E+15 | 0.4  | 0.2  | 4.00E+17 | 0.651 | 100.782 |
| 5.00E+15 | 0.4  | 0.2  | 5.00E+17 | 0.676 | 127.599 |
| 5.00E+15 | 0.4  | 0.2  | 6.00E+17 | 0.698 | 158.345 |
| 5.00E+15 | 0.4  | 0.2  | 7.00E+17 | 0.716 | 193.123 |
| 5.00E+15 | 0.4  | 0.2  | 8.00E+17 | 0.728 | 231.765 |
| 5.00E+15 | 0.4  | 0.2  | 9.00E+17 | 0.738 | 274.310 |
| 5.00E+15 | 0.4  | 0.2  | 1.00E+18 | 0.740 | 320.072 |
| 5.00E+15 | 0.4  | 0.25 | 3.00E+17 | 0.682 | 94.392  |
| 5.00E+15 | 0.4  | 0.25 | 4.00E+17 | 0.740 | 126.972 |
| 5.00E+15 | 0.4  | 0.25 | 5.00E+17 | 0.764 | 165.930 |
| 5.00E+15 | 0.4  | 0.25 | 6.00E+17 | 0.781 | 211.074 |

|          |      |      |          |       |         |
|----------|------|------|----------|-------|---------|
| 5.00E+15 | 0.4  | 0.25 | 7.00E+17 | 0.803 | 262.183 |
| 5.00E+15 | 0.4  | 0.25 | 8.00E+17 | 0.813 | 318.769 |
| 5.00E+15 | 0.4  | 0.25 | 9.00E+17 | 0.826 | 376.889 |
| 5.00E+15 | 0.4  | 0.25 | 1.00E+18 | 0.833 | 434.985 |
| 5.00E+15 | 0.4  | 0.3  | 3.00E+17 | 0.771 | 112.314 |
| 5.00E+15 | 0.4  | 0.3  | 4.00E+17 | 0.831 | 156.301 |
| 5.00E+15 | 0.4  | 0.3  | 5.00E+17 | 0.858 | 209.277 |
| 5.00E+15 | 0.4  | 0.3  | 6.00E+17 | 0.888 | 270.917 |
| 5.00E+15 | 0.4  | 0.3  | 7.00E+17 | 0.902 | 339.284 |
| 5.00E+15 | 0.4  | 0.3  | 8.00E+17 | 0.913 | 346.261 |
| 5.00E+15 | 0.4  | 0.3  | 9.00E+17 | 0.928 | 382.496 |
| 5.00E+15 | 0.4  | 0.3  | 1.00E+18 | 0.938 | 547.011 |
| 5.00E+15 | 0.4  | 0.35 | 3.00E+17 | 0.859 | 131.781 |
| 5.00E+15 | 0.4  | 0.35 | 4.00E+17 | 0.918 | 188.693 |
| 5.00E+15 | 0.4  | 0.35 | 5.00E+17 | 0.955 | 257.356 |
| 5.00E+15 | 0.4  | 0.35 | 6.00E+17 | 0.982 | 335.929 |
| 5.00E+15 | 0.4  | 0.35 | 7.00E+17 | 0.998 | 416.059 |
| 5.00E+15 | 0.4  | 0.35 | 8.00E+17 | 1.017 | 496.201 |
| 5.00E+15 | 0.4  | 0.35 | 9.00E+17 | 1.036 | 576.220 |
| 5.00E+15 | 0.4  | 0.35 | 1.00E+18 | 1.049 | 656.190 |
| 5.00E+15 | 0.4  | 0.4  | 3.00E+17 | 0.951 | 153.125 |
| 5.00E+15 | 0.4  | 0.4  | 4.00E+17 | 1.022 | 224.199 |
| 5.00E+15 | 0.4  | 0.4  | 5.00E+17 | 1.063 | 309.887 |
| 5.00E+15 | 0.4  | 0.4  | 6.00E+17 | 1.091 | 400.674 |
| 5.00E+15 | 0.4  | 0.4  | 7.00E+17 | 1.120 | 491.484 |
| 5.00E+15 | 0.4  | 0.4  | 8.00E+17 | 1.144 | 582.330 |
| 5.00E+15 | 0.4  | 0.4  | 9.00E+17 | 1.161 | 672.900 |
| 5.00E+15 | 0.4  | 0.4  | 1.00E+18 | 1.182 | 762.845 |
| 5.00E+15 | 0.45 | 0.15 | 3.00E+17 | 0.527 | 65.758  |
| 5.00E+15 | 0.45 | 0.15 | 4.00E+17 | 0.563 | 81.291  |
| 5.00E+15 | 0.45 | 0.15 | 5.00E+17 | 0.617 | 98.984  |
| 5.00E+15 | 0.45 | 0.15 | 6.00E+17 | 0.657 | 119.491 |
| 5.00E+15 | 0.45 | 0.15 | 7.00E+17 | 0.685 | 142.305 |
| 5.00E+15 | 0.45 | 0.15 | 8.00E+17 | 0.698 | 167.661 |
| 5.00E+15 | 0.45 | 0.15 | 9.00E+17 | 0.710 | 195.392 |
| 5.00E+15 | 0.45 | 0.15 | 1.00E+18 | 0.718 | 225.506 |
| 5.00E+15 | 0.45 | 0.2  | 3.00E+17 | 0.627 | 82.474  |
| 5.00E+15 | 0.45 | 0.2  | 4.00E+17 | 0.698 | 107.678 |
| 5.00E+15 | 0.45 | 0.2  | 5.00E+17 | 0.735 | 137.767 |
| 5.00E+15 | 0.45 | 0.2  | 6.00E+17 | 0.759 | 172.620 |
| 5.00E+15 | 0.45 | 0.2  | 7.00E+17 | 0.779 | 211.919 |
| 5.00E+15 | 0.45 | 0.2  | 8.00E+17 | 0.794 | 255.798 |
| 5.00E+15 | 0.45 | 0.2  | 9.00E+17 | 0.815 | 303.786 |
| 5.00E+15 | 0.45 | 0.2  | 1.00E+18 | 0.823 | 353.781 |
| 5.00E+15 | 0.45 | 0.25 | 3.00E+17 | 0.747 | 100.485 |
| 5.00E+15 | 0.45 | 0.25 | 4.00E+17 | 0.808 | 137.279 |
| 5.00E+15 | 0.45 | 0.25 | 5.00E+17 | 0.848 | 181.408 |
| 5.00E+15 | 0.45 | 0.25 | 6.00E+17 | 0.871 | 232.629 |
| 5.00E+15 | 0.45 | 0.25 | 7.00E+17 | 0.895 | 290.647 |
| 5.00E+15 | 0.45 | 0.25 | 8.00E+17 | 0.915 | 352.621 |
| 5.00E+15 | 0.45 | 0.25 | 9.00E+17 | 0.920 | 414.767 |
| 5.00E+15 | 0.45 | 0.25 | 1.00E+18 | 0.938 | 477.218 |
| 5.00E+15 | 0.45 | 0.3  | 3.00E+17 | 0.848 | 120.947 |
| 5.00E+15 | 0.45 | 0.3  | 4.00E+17 | 0.913 | 170.869 |
| 5.00E+15 | 0.45 | 0.3  | 5.00E+17 | 0.947 | 231.054 |
| 5.00E+15 | 0.45 | 0.3  | 6.00E+17 | 0.975 | 300.811 |
| 5.00E+15 | 0.45 | 0.3  | 7.00E+17 | 1.010 | 375.113 |
| 5.00E+15 | 0.45 | 0.3  | 8.00E+17 | 1.032 | 449.487 |

|          |      |      |          |       |          |
|----------|------|------|----------|-------|----------|
| 5.00E+15 | 0.45 | 0.3  | 9.00E+17 | 1.050 | 523.825  |
| 5.00E+15 | 0.45 | 0.3  | 1.00E+18 | 1.067 | 596.840  |
| 5.00E+15 | 0.45 | 0.35 | 3.00E+17 | 0.958 | 143.347  |
| 5.00E+15 | 0.45 | 0.35 | 4.00E+17 | 1.038 | 207.919  |
| 5.00E+15 | 0.45 | 0.35 | 5.00E+17 | 1.092 | 286.253  |
| 5.00E+15 | 0.45 | 0.35 | 6.00E+17 | 1.120 | 371.850  |
| 5.00E+15 | 0.45 | 0.35 | 7.00E+17 | 1.144 | 457.891  |
| 5.00E+15 | 0.45 | 0.35 | 8.00E+17 | 1.174 | 543.932  |
| 5.00E+15 | 0.45 | 0.35 | 9.00E+17 | 1.200 | 629.860  |
| 5.00E+15 | 0.45 | 0.35 | 1.00E+18 | 1.217 | 715.575  |
| 5.00E+15 | 0.45 | 0.4  | 3.00E+17 | 1.076 | 167.714  |
| 5.00E+15 | 0.45 | 0.4  | 4.00E+17 | 1.172 | 248.765  |
| 5.00E+15 | 0.45 | 0.4  | 5.00E+17 | 1.239 | 344.358  |
| 5.00E+15 | 0.45 | 0.4  | 6.00E+17 | 1.270 | 441.902  |
| 5.00E+15 | 0.45 | 0.4  | 7.00E+17 | 1.304 | 535.484  |
| 5.00E+15 | 0.45 | 0.4  | 8.00E+17 | 1.346 | 637.054  |
| 5.00E+15 | 0.45 | 0.4  | 9.00E+17 | 1.370 | 734.285  |
| 5.00E+15 | 0.45 | 0.4  | 1.00E+18 | 1.395 | 830.724  |
| 5.00E+15 | 0.5  | 0.15 | 3.00E+17 | 0.547 | 129.890  |
| 5.00E+15 | 0.5  | 0.15 | 4.00E+17 | 0.590 | 158.517  |
| 5.00E+15 | 0.5  | 0.15 | 5.00E+17 | 0.658 | 170.221  |
| 5.00E+15 | 0.5  | 0.15 | 6.00E+17 | 0.710 | 181.604  |
| 5.00E+15 | 0.5  | 0.15 | 7.00E+17 | 0.746 | 194.900  |
| 5.00E+15 | 0.5  | 0.15 | 8.00E+17 | 0.764 | 208.139  |
| 5.00E+15 | 0.5  | 0.15 | 9.00E+17 | 0.776 | 224.442  |
| 5.00E+15 | 0.5  | 0.15 | 1.00E+18 | 0.790 | 236.387  |
| 5.00E+15 | 0.5  | 0.2  | 3.00E+17 | 0.669 | 162.195  |
| 5.00E+15 | 0.5  | 0.2  | 4.00E+17 | 0.756 | 209.067  |
| 5.00E+15 | 0.5  | 0.2  | 5.00E+17 | 0.815 | 260.872  |
| 5.00E+15 | 0.5  | 0.2  | 6.00E+17 | 0.845 | 318.410  |
| 5.00E+15 | 0.5  | 0.2  | 7.00E+17 | 0.871 | 376.054  |
| 5.00E+15 | 0.5  | 0.2  | 8.00E+17 | 0.886 | 438.130  |
| 5.00E+15 | 0.5  | 0.2  | 9.00E+17 | 0.897 | 497.743  |
| 5.00E+15 | 0.5  | 0.2  | 1.00E+18 | 0.910 | 557.771  |
| 5.00E+15 | 0.5  | 0.25 | 3.00E+17 | 0.794 | 197.357  |
| 5.00E+15 | 0.5  | 0.25 | 4.00E+17 | 0.900 | 261.544  |
| 5.00E+15 | 0.5  | 0.25 | 5.00E+17 | 0.940 | 334.944  |
| 5.00E+15 | 0.5  | 0.25 | 6.00E+17 | 0.981 | 410.228  |
| 5.00E+15 | 0.5  | 0.25 | 7.00E+17 | 1.003 | 487.633  |
| 5.00E+15 | 0.5  | 0.25 | 8.00E+17 | 1.027 | 560.931  |
| 5.00E+15 | 0.5  | 0.25 | 9.00E+17 | 1.040 | 638.461  |
| 5.00E+15 | 0.5  | 0.25 | 1.00E+18 | 1.062 | 712.853  |
| 5.00E+15 | 0.5  | 0.3  | 3.00E+17 | 0.952 | 235.278  |
| 5.00E+15 | 0.5  | 0.3  | 4.00E+17 | 1.033 | 322.938  |
| 5.00E+15 | 0.5  | 0.3  | 5.00E+17 | 1.092 | 304.658  |
| 5.00E+15 | 0.5  | 0.3  | 6.00E+17 | 1.126 | 503.457  |
| 5.00E+15 | 0.5  | 0.3  | 7.00E+17 | 1.161 | 593.844  |
| 5.00E+15 | 0.5  | 0.3  | 8.00E+17 | 1.175 | 684.128  |
| 5.00E+15 | 0.5  | 0.3  | 9.00E+17 | 1.219 | 773.394  |
| 5.00E+15 | 0.5  | 0.3  | 1.00E+18 | 1.233 | 861.228  |
| 5.00E+15 | 0.5  | 0.35 | 3.00E+17 | 1.092 | 275.927  |
| 5.00E+15 | 0.5  | 0.35 | 4.00E+17 | 1.181 | 379.944  |
| 5.00E+15 | 0.5  | 0.35 | 5.00E+17 | 1.273 | 486.922  |
| 5.00E+15 | 0.5  | 0.35 | 6.00E+17 | 1.300 | 589.928  |
| 5.00E+15 | 0.5  | 0.35 | 7.00E+17 | 1.333 | 696.934  |
| 5.00E+15 | 0.5  | 0.35 | 8.00E+17 | 1.373 | 800.541  |
| 5.00E+15 | 0.5  | 0.35 | 9.00E+17 | 1.401 | 902.373  |
| 5.00E+15 | 0.5  | 0.35 | 1.00E+18 | 1.429 | 1001.000 |

|          |     |      |          |       |          |
|----------|-----|------|----------|-------|----------|
| 5.00E+15 | 0.5 | 0.4  | 3.00E+17 | 1.238 | 318.879  |
| 5.00E+15 | 0.5 | 0.4  | 4.00E+17 | 1.351 | 427.758  |
| 5.00E+15 | 0.5 | 0.4  | 5.00E+17 | 1.477 | 557.321  |
| 5.00E+15 | 0.5 | 0.4  | 6.00E+17 | 1.502 | 678.896  |
| 5.00E+15 | 0.5 | 0.4  | 7.00E+17 | 1.551 | 797.024  |
| 5.00E+15 | 0.5 | 0.4  | 8.00E+17 | 1.606 | 913.031  |
| 5.00E+15 | 0.5 | 0.4  | 9.00E+17 | 1.629 | 1025.440 |
| 5.00E+15 | 0.5 | 0.4  | 1.00E+18 | 1.667 | 1131.870 |
| 5.00E+15 | 0.6 | 0.15 | 3.00E+17 | 0.591 | 136.917  |
| 5.00E+15 | 0.6 | 0.15 | 4.00E+17 | 0.646 | 167.845  |
| 5.00E+15 | 0.6 | 0.15 | 5.00E+17 | 0.750 | 203.410  |
| 5.00E+15 | 0.6 | 0.15 | 6.00E+17 | 0.833 | 245.321  |
| 5.00E+15 | 0.6 | 0.15 | 7.00E+17 | 0.896 | 287.248  |
| 5.00E+15 | 0.6 | 0.15 | 8.00E+17 | 0.933 | 336.102  |
| 5.00E+15 | 0.6 | 0.2  | 3.00E+17 | 0.763 | 171.839  |
| 5.00E+15 | 0.6 | 0.2  | 4.00E+17 | 0.905 | 222.625  |
| 5.00E+15 | 0.6 | 0.2  | 5.00E+17 | 1.014 | 281.161  |
| 5.00E+15 | 0.6 | 0.2  | 6.00E+17 | 1.060 | 347.241  |
| 5.00E+15 | 0.6 | 0.2  | 7.00E+17 | 1.095 | 409.508  |
| 5.00E+15 | 0.6 | 0.2  | 8.00E+17 | 1.129 | 476.233  |
| 5.00E+15 | 0.6 | 0.2  | 9.00E+17 | 1.150 | 540.840  |
| 5.00E+15 | 0.6 | 0.2  | 1.00E+18 | 1.176 | 605.547  |
| 5.00E+15 | 0.6 | 0.25 | 3.00E+17 | 1.008 | 212.295  |
| 5.00E+15 | 0.6 | 0.25 | 4.00E+17 | 1.129 | 285.555  |
| 5.00E+15 | 0.6 | 0.25 | 5.00E+17 | 1.242 | 366.585  |
| 5.00E+15 | 0.6 | 0.25 | 6.00E+17 | 1.275 | 450.191  |
| 5.00E+15 | 0.6 | 0.25 | 7.00E+17 | 1.309 | 531.524  |
| 5.00E+15 | 0.6 | 0.25 | 8.00E+17 | 1.364 | 613.284  |
| 5.00E+15 | 0.6 | 0.25 | 9.00E+17 | 1.403 | 694.654  |
| 5.00E+15 | 0.6 | 0.25 | 1.00E+18 | 1.437 | 775.312  |
| 5.00E+15 | 0.6 | 0.3  | 3.00E+17 | 1.218 | 258.489  |
| 5.00E+15 | 0.6 | 0.3  | 4.00E+17 | 1.351 | 352.459  |
| 5.00E+15 | 0.6 | 0.3  | 5.00E+17 | 1.491 | 452.563  |
| 5.00E+15 | 0.6 | 0.3  | 6.00E+17 | 1.532 | 550.478  |
| 5.00E+15 | 0.6 | 0.3  | 7.00E+17 | 1.597 | 503.521  |
| 5.00E+15 | 0.6 | 0.3  | 8.00E+17 | 1.646 | 746.440  |
| 5.00E+15 | 0.6 | 0.3  | 9.00E+17 | 1.693 | 843.016  |
| 5.00E+15 | 0.6 | 0.3  | 1.00E+18 | 1.738 | 937.728  |
| 5.00E+15 | 0.6 | 0.35 | 3.00E+17 | 1.454 | 303.850  |
| 5.00E+15 | 0.6 | 0.35 | 4.00E+17 | 1.619 | 420.125  |
| 5.00E+15 | 0.6 | 0.35 | 5.00E+17 | 1.845 | 533.920  |
| 5.00E+15 | 0.6 | 0.35 | 6.00E+17 | 1.850 | 648.647  |
| 5.00E+15 | 0.6 | 0.35 | 7.00E+17 | 1.931 | 762.548  |
| 5.00E+15 | 0.6 | 0.35 | 1.00E+18 | 2.091 | 1090.890 |
| 5.00E+15 | 0.6 | 0.4  | 3.00E+17 | 1.732 | 354.445  |
| 5.00E+15 | 0.6 | 0.4  | 4.00E+17 | 1.938 | 484.421  |
| 5.00E+15 | 0.6 | 0.4  | 5.00E+17 | 2.283 | 614.733  |
| 5.00E+15 | 0.6 | 0.4  | 6.00E+17 | 2.248 | 744.869  |
| 5.00E+15 | 0.6 | 0.4  | 7.00E+17 | 2.356 | 873.333  |
| 5.00E+15 | 0.6 | 0.4  | 8.00E+17 | 2.433 | 999.292  |
| 5.00E+15 | 0.6 | 0.4  | 9.00E+17 | 2.518 | 1119.930 |
| 7.00E+15 | 0.2 | 0.15 | 3.00E+17 | 0.320 | 55.491   |
| 7.00E+15 | 0.2 | 0.15 | 4.00E+17 | 0.327 | 64.762   |
| 7.00E+15 | 0.2 | 0.15 | 5.00E+17 | 0.336 | 74.470   |
| 7.00E+15 | 0.2 | 0.15 | 6.00E+17 | 0.341 | 84.589   |
| 7.00E+15 | 0.2 | 0.15 | 7.00E+17 | 0.347 | 95.039   |
| 7.00E+15 | 0.2 | 0.15 | 8.00E+17 | 0.348 | 105.820  |
| 7.00E+15 | 0.2 | 0.15 | 9.00E+17 | 0.352 | 116.868  |

|          |      |      |          |       |         |
|----------|------|------|----------|-------|---------|
| 7.00E+15 | 0.2  | 0.15 | 1.00E+18 | 0.353 | 128.582 |
| 7.00E+15 | 0.2  | 0.2  | 3.00E+17 | 0.337 | 64.779  |
| 7.00E+15 | 0.2  | 0.2  | 4.00E+17 | 0.351 | 77.891  |
| 7.00E+15 | 0.2  | 0.2  | 5.00E+17 | 0.360 | 91.659  |
| 7.00E+15 | 0.2  | 0.2  | 6.00E+17 | 0.361 | 106.035 |
| 7.00E+15 | 0.2  | 0.2  | 7.00E+17 | 0.366 | 121.026 |
| 7.00E+15 | 0.2  | 0.2  | 8.00E+17 | 0.368 | 130.162 |
| 7.00E+15 | 0.2  | 0.2  | 9.00E+17 | 0.370 | 142.683 |
| 7.00E+15 | 0.2  | 0.2  | 1.00E+18 | 0.372 | 150.040 |
| 7.00E+15 | 0.2  | 0.25 | 3.00E+17 | 0.359 | 73.996  |
| 7.00E+15 | 0.2  | 0.25 | 4.00E+17 | 0.369 | 90.955  |
| 7.00E+15 | 0.2  | 0.25 | 5.00E+17 | 0.374 | 108.779 |
| 7.00E+15 | 0.2  | 0.25 | 6.00E+17 | 0.381 | 127.742 |
| 7.00E+15 | 0.2  | 0.25 | 7.00E+17 | 0.383 | 147.574 |
| 7.00E+15 | 0.2  | 0.25 | 8.00E+17 | 0.387 | 172.258 |
| 7.00E+15 | 0.2  | 0.25 | 9.00E+17 | 0.391 | 197.711 |
| 7.00E+15 | 0.2  | 0.25 | 1.00E+18 | 0.391 | 223.990 |
| 7.00E+15 | 0.2  | 0.3  | 3.00E+17 | 0.380 | 83.111  |
| 7.00E+15 | 0.2  | 0.3  | 4.00E+17 | 0.385 | 103.815 |
| 7.00E+15 | 0.2  | 0.3  | 5.00E+17 | 0.394 | 125.961 |
| 7.00E+15 | 0.2  | 0.3  | 6.00E+17 | 0.398 | 151.131 |
| 7.00E+15 | 0.2  | 0.3  | 7.00E+17 | 0.406 | 179.611 |
| 7.00E+15 | 0.2  | 0.3  | 8.00E+17 | 0.408 | 210.908 |
| 7.00E+15 | 0.2  | 0.3  | 9.00E+17 | 0.411 | 243.643 |
| 7.00E+15 | 0.2  | 0.3  | 1.00E+18 | 0.413 | 282.782 |
| 7.00E+15 | 0.2  | 0.35 | 3.00E+17 | 0.394 | 91.961  |
| 7.00E+15 | 0.2  | 0.35 | 4.00E+17 | 0.404 | 116.395 |
| 7.00E+15 | 0.2  | 0.35 | 5.00E+17 | 0.413 | 144.110 |
| 7.00E+15 | 0.2  | 0.35 | 6.00E+17 | 0.420 | 174.814 |
| 7.00E+15 | 0.2  | 0.35 | 7.00E+17 | 0.425 | 210.915 |
| 7.00E+15 | 0.2  | 0.35 | 8.00E+17 | 0.430 | 200.908 |
| 7.00E+15 | 0.2  | 0.35 | 9.00E+17 | 0.434 | 295.092 |
| 7.00E+15 | 0.2  | 0.35 | 1.00E+18 | 0.440 | 343.177 |
| 7.00E+15 | 0.2  | 0.4  | 3.00E+17 | 0.411 | 100.606 |
| 7.00E+15 | 0.2  | 0.4  | 4.00E+17 | 0.425 | 129.585 |
| 7.00E+15 | 0.2  | 0.4  | 5.00E+17 | 0.437 | 163.746 |
| 7.00E+15 | 0.2  | 0.4  | 6.00E+17 | 0.445 | 203.084 |
| 7.00E+15 | 0.2  | 0.4  | 7.00E+17 | 0.456 | 247.838 |
| 7.00E+15 | 0.2  | 0.4  | 8.00E+17 | 0.459 | 297.732 |
| 7.00E+15 | 0.2  | 0.4  | 9.00E+17 | 0.460 | 350.882 |
| 7.00E+15 | 0.2  | 0.4  | 1.00E+18 | 0.466 | 410.587 |
| 7.00E+15 | 0.25 | 0.15 | 3.00E+17 | 0.328 | 47.271  |
| 7.00E+15 | 0.25 | 0.15 | 4.00E+17 | 0.340 | 56.503  |
| 7.00E+15 | 0.25 | 0.15 | 5.00E+17 | 0.349 | 66.138  |
| 7.00E+15 | 0.25 | 0.15 | 6.00E+17 | 0.357 | 76.319  |
| 7.00E+15 | 0.25 | 0.15 | 7.00E+17 | 0.362 | 86.879  |
| 7.00E+15 | 0.25 | 0.15 | 8.00E+17 | 0.365 | 97.759  |
| 7.00E+15 | 0.25 | 0.15 | 9.00E+17 | 0.368 | 109.041 |
| 7.00E+15 | 0.25 | 0.15 | 1.00E+18 | 0.370 | 120.779 |
| 7.00E+15 | 0.25 | 0.2  | 3.00E+17 | 0.356 | 57.002  |
| 7.00E+15 | 0.25 | 0.2  | 4.00E+17 | 0.367 | 70.356  |
| 7.00E+15 | 0.25 | 0.2  | 5.00E+17 | 0.376 | 84.616  |
| 7.00E+15 | 0.25 | 0.2  | 6.00E+17 | 0.382 | 99.559  |
| 7.00E+15 | 0.25 | 0.2  | 7.00E+17 | 0.392 | 115.141 |
| 7.00E+15 | 0.25 | 0.2  | 8.00E+17 | 0.390 | 132.139 |
| 7.00E+15 | 0.25 | 0.2  | 9.00E+17 | 0.391 | 150.590 |
| 7.00E+15 | 0.25 | 0.2  | 1.00E+18 | 0.394 | 171.082 |
| 7.00E+15 | 0.25 | 0.3  | 3.00E+17 | 0.401 | 75.449  |

|          |      |      |          |       |         |
|----------|------|------|----------|-------|---------|
| 7.00E+15 | 0.25 | 0.3  | 4.00E+17 | 0.414 | 96.627  |
| 7.00E+15 | 0.25 | 0.3  | 5.00E+17 | 0.426 | 119.649 |
| 7.00E+15 | 0.25 | 0.3  | 6.00E+17 | 0.439 | 145.801 |
| 7.00E+15 | 0.25 | 0.3  | 7.00E+17 | 0.440 | 175.954 |
| 7.00E+15 | 0.25 | 0.3  | 8.00E+17 | 0.447 | 209.555 |
| 7.00E+15 | 0.25 | 0.3  | 9.00E+17 | 0.449 | 246.578 |
| 7.00E+15 | 0.25 | 0.3  | 1.00E+18 | 0.452 | 287.205 |
| 7.00E+15 | 0.25 | 0.35 | 3.00E+17 | 0.422 | 84.470  |
| 7.00E+15 | 0.25 | 0.35 | 4.00E+17 | 0.445 | 109.637 |
| 7.00E+15 | 0.25 | 0.35 | 5.00E+17 | 0.456 | 138.523 |
| 7.00E+15 | 0.25 | 0.35 | 6.00E+17 | 0.467 | 172.553 |
| 7.00E+15 | 0.25 | 0.35 | 7.00E+17 | 0.475 | 211.290 |
| 7.00E+15 | 0.25 | 0.35 | 8.00E+17 | 0.475 | 254.662 |
| 7.00E+15 | 0.25 | 0.35 | 9.00E+17 | 0.482 | 302.605 |
| 7.00E+15 | 0.25 | 0.35 | 1.00E+18 | 0.486 | 355.221 |
| 7.00E+15 | 0.25 | 0.4  | 3.00E+17 | 0.445 | 93.457  |
| 7.00E+15 | 0.25 | 0.4  | 4.00E+17 | 0.473 | 123.478 |
| 7.00E+15 | 0.25 | 0.4  | 5.00E+17 | 0.486 | 159.372 |
| 7.00E+15 | 0.25 | 0.4  | 6.00E+17 | 0.496 | 201.616 |
| 7.00E+15 | 0.25 | 0.4  | 7.00E+17 | 0.504 | 249.849 |
| 7.00E+15 | 0.25 | 0.4  | 8.00E+17 | 0.512 | 304.011 |
| 7.00E+15 | 0.25 | 0.4  | 9.00E+17 | 0.518 | 363.962 |
| 7.00E+15 | 0.25 | 0.4  | 1.00E+18 | 0.526 | 429.281 |
| 7.00E+15 | 0.3  | 0.15 | 3.00E+17 | 0.339 | 50.059  |
| 7.00E+15 | 0.3  | 0.15 | 4.00E+17 | 0.355 | 60.421  |
| 7.00E+15 | 0.3  | 0.15 | 5.00E+17 | 0.366 | 71.417  |
| 7.00E+15 | 0.3  | 0.15 | 6.00E+17 | 0.377 | 82.961  |
| 7.00E+15 | 0.3  | 0.15 | 7.00E+17 | 0.385 | 94.894  |
| 7.00E+15 | 0.3  | 0.15 | 8.00E+17 | 0.388 | 107.360 |
| 7.00E+15 | 0.3  | 0.15 | 9.00E+17 | 0.390 | 120.459 |
| 7.00E+15 | 0.3  | 0.15 | 1.00E+18 | 0.392 | 134.606 |
| 7.00E+15 | 0.3  | 0.2  | 3.00E+17 | 0.373 | 60.926  |
| 7.00E+15 | 0.3  | 0.2  | 4.00E+17 | 0.388 | 76.143  |
| 7.00E+15 | 0.3  | 0.2  | 5.00E+17 | 0.402 | 92.161  |
| 7.00E+15 | 0.3  | 0.2  | 6.00E+17 | 0.409 | 109.095 |
| 7.00E+15 | 0.3  | 0.2  | 7.00E+17 | 0.412 | 127.565 |
| 7.00E+15 | 0.3  | 0.2  | 8.00E+17 | 0.417 | 147.816 |
| 7.00E+15 | 0.3  | 0.2  | 9.00E+17 | 0.420 | 170.553 |
| 7.00E+15 | 0.3  | 0.2  | 1.00E+18 | 0.422 | 195.050 |
| 7.00E+15 | 0.3  | 0.25 | 3.00E+17 | 0.400 | 72.721  |
| 7.00E+15 | 0.3  | 0.25 | 4.00E+17 | 0.421 | 92.491  |
| 7.00E+15 | 0.3  | 0.25 | 5.00E+17 | 0.436 | 112.127 |
| 7.00E+15 | 0.3  | 0.25 | 6.00E+17 | 0.446 | 135.686 |
| 7.00E+15 | 0.3  | 0.25 | 7.00E+17 | 0.451 | 162.570 |
| 7.00E+15 | 0.3  | 0.25 | 8.00E+17 | 0.452 | 195.206 |
| 7.00E+15 | 0.3  | 0.25 | 9.00E+17 | 0.460 | 225.709 |
| 7.00E+15 | 0.3  | 0.25 | 1.00E+18 | 0.464 | 261.952 |
| 7.00E+15 | 0.3  | 0.3  | 3.00E+17 | 0.429 | 83.414  |
| 7.00E+15 | 0.3  | 0.3  | 4.00E+17 | 0.462 | 107.810 |
| 7.00E+15 | 0.3  | 0.3  | 5.00E+17 | 0.471 | 135.631 |
| 7.00E+15 | 0.3  | 0.3  | 6.00E+17 | 0.483 | 165.895 |
| 7.00E+15 | 0.3  | 0.3  | 7.00E+17 | 0.489 | 205.390 |
| 7.00E+15 | 0.3  | 0.3  | 8.00E+17 | 0.496 | 243.349 |
| 7.00E+15 | 0.3  | 0.3  | 9.00E+17 | 0.498 | 292.486 |
| 7.00E+15 | 0.3  | 0.3  | 1.00E+18 | 0.507 | 338.392 |
| 7.00E+15 | 0.3  | 0.35 | 3.00E+17 | 0.458 | 93.948  |
| 7.00E+15 | 0.3  | 0.35 | 4.00E+17 | 0.493 | 123.899 |
| 7.00E+15 | 0.3  | 0.35 | 5.00E+17 | 0.508 | 159.779 |

|          |      |      |          |       |         |
|----------|------|------|----------|-------|---------|
| 7.00E+15 | 0.3  | 0.35 | 6.00E+17 | 0.523 | 201.951 |
| 7.00E+15 | 0.3  | 0.35 | 7.00E+17 | 0.529 | 246.574 |
| 7.00E+15 | 0.3  | 0.35 | 8.00E+17 | 0.535 | 303.816 |
| 7.00E+15 | 0.3  | 0.35 | 9.00E+17 | 0.545 | 358.896 |
| 7.00E+15 | 0.3  | 0.35 | 1.00E+18 | 0.552 | 425.444 |
| 7.00E+15 | 0.3  | 0.4  | 3.00E+17 | 0.489 | 104.568 |
| 7.00E+15 | 0.3  | 0.4  | 4.00E+17 | 0.535 | 139.162 |
| 7.00E+15 | 0.3  | 0.4  | 5.00E+17 | 0.550 | 183.397 |
| 7.00E+15 | 0.3  | 0.4  | 6.00E+17 | 0.562 | 235.419 |
| 7.00E+15 | 0.3  | 0.4  | 7.00E+17 | 0.572 | 298.793 |
| 7.00E+15 | 0.3  | 0.4  | 8.00E+17 | 0.579 | 361.707 |
| 7.00E+15 | 0.3  | 0.4  | 9.00E+17 | 0.591 | 440.591 |
| 7.00E+15 | 0.3  | 0.4  | 1.00E+18 | 0.596 | 510.656 |
| 7.00E+15 | 0.35 | 0.15 | 3.00E+17 | 0.353 | 53.448  |
| 7.00E+15 | 0.35 | 0.15 | 4.00E+17 | 0.370 | 64.910  |
| 7.00E+15 | 0.35 | 0.15 | 5.00E+17 | 0.384 | 77.212  |
| 7.00E+15 | 0.35 | 0.15 | 6.00E+17 | 0.400 | 89.973  |
| 7.00E+15 | 0.35 | 0.15 | 7.00E+17 | 0.407 | 103.376 |
| 7.00E+15 | 0.35 | 0.15 | 8.00E+17 | 0.411 | 117.490 |
| 7.00E+15 | 0.35 | 0.15 | 9.00E+17 | 0.416 | 132.865 |
| 7.00E+15 | 0.35 | 0.15 | 1.00E+18 | 0.418 | 149.538 |
| 7.00E+15 | 0.35 | 0.2  | 3.00E+17 | 0.393 | 65.646  |
| 7.00E+15 | 0.35 | 0.2  | 4.00E+17 | 0.417 | 82.604  |
| 7.00E+15 | 0.35 | 0.2  | 5.00E+17 | 0.433 | 100.597 |
| 7.00E+15 | 0.35 | 0.2  | 6.00E+17 | 0.446 | 119.906 |
| 7.00E+15 | 0.35 | 0.2  | 7.00E+17 | 0.451 | 141.631 |
| 7.00E+15 | 0.35 | 0.2  | 8.00E+17 | 0.458 | 166.122 |
| 7.00E+15 | 0.35 | 0.2  | 9.00E+17 | 0.460 | 192.879 |
| 7.00E+15 | 0.35 | 0.2  | 1.00E+18 | 0.464 | 222.131 |
| 7.00E+15 | 0.35 | 0.25 | 3.00E+17 | 0.428 | 77.733  |
| 7.00E+15 | 0.35 | 0.25 | 4.00E+17 | 0.459 | 99.761  |
| 7.00E+15 | 0.35 | 0.25 | 5.00E+17 | 0.478 | 124.090 |
| 7.00E+15 | 0.35 | 0.25 | 6.00E+17 | 0.487 | 152.243 |
| 7.00E+15 | 0.35 | 0.25 | 7.00E+17 | 0.497 | 184.319 |
| 7.00E+15 | 0.35 | 0.25 | 8.00E+17 | 0.500 | 218.292 |
| 7.00E+15 | 0.35 | 0.25 | 9.00E+17 | 0.518 | 242.776 |
| 7.00E+15 | 0.35 | 0.25 | 1.00E+18 | 0.521 | 303.296 |
| 7.00E+15 | 0.35 | 0.3  | 3.00E+17 | 0.472 | 89.722  |
| 7.00E+15 | 0.35 | 0.3  | 4.00E+17 | 0.506 | 117.467 |
| 7.00E+15 | 0.35 | 0.3  | 5.00E+17 | 0.529 | 150.333 |
| 7.00E+15 | 0.35 | 0.3  | 6.00E+17 | 0.536 | 188.733 |
| 7.00E+15 | 0.35 | 0.3  | 7.00E+17 | 0.550 | 232.785 |
| 7.00E+15 | 0.35 | 0.3  | 8.00E+17 | 0.558 | 282.197 |
| 7.00E+15 | 0.35 | 0.3  | 9.00E+17 | 0.565 | 336.801 |
| 7.00E+15 | 0.35 | 0.3  | 1.00E+18 | 0.572 | 396.571 |
| 7.00E+15 | 0.35 | 0.35 | 3.00E+17 | 0.520 | 101.737 |
| 7.00E+15 | 0.35 | 0.35 | 4.00E+17 | 0.549 | 136.679 |
| 7.00E+15 | 0.35 | 0.35 | 5.00E+17 | 0.578 | 179.465 |
| 7.00E+15 | 0.35 | 0.35 | 6.00E+17 | 0.586 | 229.517 |
| 7.00E+15 | 0.35 | 0.35 | 7.00E+17 | 0.600 | 286.828 |
| 7.00E+15 | 0.35 | 0.35 | 8.00E+17 | 0.610 | 351.184 |
| 7.00E+15 | 0.35 | 0.35 | 9.00E+17 | 0.621 | 422.068 |
| 7.00E+15 | 0.35 | 0.35 | 1.00E+18 | 0.628 | 495.887 |
| 7.00E+15 | 0.35 | 0.4  | 3.00E+17 | 0.558 | 114.342 |
| 7.00E+15 | 0.35 | 0.4  | 4.00E+17 | 0.603 | 158.117 |
| 7.00E+15 | 0.35 | 0.4  | 5.00E+17 | 0.626 | 211.332 |
| 7.00E+15 | 0.35 | 0.4  | 6.00E+17 | 0.643 | 274.249 |
| 7.00E+15 | 0.35 | 0.4  | 7.00E+17 | 0.656 | 346.192 |



|          |      |      |          |       |         |
|----------|------|------|----------|-------|---------|
| 7.00E+15 | 0.35 | 0.4  | 8.00E+17 | 0.672 | 426.623 |
| 7.00E+15 | 0.35 | 0.4  | 9.00E+17 | 0.681 | 510.146 |
| 7.00E+15 | 0.35 | 0.4  | 1.00E+18 | 0.687 | 593.442 |
| 7.00E+15 | 0.4  | 0.15 | 3.00E+17 | 0.368 | 55.536  |
| 7.00E+15 | 0.4  | 0.15 | 4.00E+17 | 0.391 | 68.031  |
| 7.00E+15 | 0.4  | 0.15 | 5.00E+17 | 0.410 | 81.318  |
| 7.00E+15 | 0.4  | 0.15 | 6.00E+17 | 0.431 | 95.260  |
| 7.00E+15 | 0.4  | 0.15 | 7.00E+17 | 0.440 | 109.887 |
| 7.00E+15 | 0.4  | 0.15 | 8.00E+17 | 0.447 | 125.998 |
| 7.00E+15 | 0.4  | 0.15 | 9.00E+17 | 0.454 | 143.469 |
| 7.00E+15 | 0.4  | 0.15 | 1.00E+18 | 0.455 | 162.394 |
| 7.00E+15 | 0.4  | 0.2  | 3.00E+17 | 0.417 | 68.806  |
| 7.00E+15 | 0.4  | 0.2  | 4.00E+17 | 0.451 | 87.189  |
| 7.00E+15 | 0.4  | 0.2  | 5.00E+17 | 0.473 | 106.744 |
| 7.00E+15 | 0.4  | 0.2  | 6.00E+17 | 0.494 | 128.732 |
| 7.00E+15 | 0.4  | 0.2  | 7.00E+17 | 0.498 | 153.624 |
| 7.00E+15 | 0.4  | 0.2  | 8.00E+17 | 0.503 | 181.410 |
| 7.00E+15 | 0.4  | 0.2  | 9.00E+17 | 0.509 | 212.130 |
| 7.00E+15 | 0.4  | 0.2  | 1.00E+18 | 0.501 | 245.685 |
| 7.00E+15 | 0.4  | 0.25 | 3.00E+17 | 0.472 | 82.039  |
| 7.00E+15 | 0.4  | 0.25 | 4.00E+17 | 0.511 | 106.080 |
| 7.00E+15 | 0.4  | 0.25 | 5.00E+17 | 0.528 | 133.766 |
| 7.00E+15 | 0.4  | 0.25 | 6.00E+17 | 0.546 | 166.278 |
| 7.00E+15 | 0.4  | 0.25 | 7.00E+17 | 0.556 | 203.169 |
| 7.00E+15 | 0.4  | 0.25 | 8.00E+17 | 0.561 | 244.378 |
| 7.00E+15 | 0.4  | 0.25 | 9.00E+17 | 0.575 | 289.937 |
| 7.00E+15 | 0.4  | 0.25 | 1.00E+18 | 0.586 | 339.712 |
| 7.00E+15 | 0.4  | 0.3  | 3.00E+17 | 0.529 | 95.389  |
| 7.00E+15 | 0.4  | 0.3  | 4.00E+17 | 0.570 | 126.724 |
| 7.00E+15 | 0.4  | 0.3  | 5.00E+17 | 0.590 | 164.674 |
| 7.00E+15 | 0.4  | 0.3  | 6.00E+17 | 0.604 | 208.957 |
| 7.00E+15 | 0.4  | 0.3  | 7.00E+17 | 0.617 | 259.502 |
| 7.00E+15 | 0.4  | 0.3  | 8.00E+17 | 0.631 | 316.474 |
| 7.00E+15 | 0.4  | 0.3  | 9.00E+17 | 0.635 | 379.630 |
| 7.00E+15 | 0.4  | 0.3  | 1.00E+18 | 0.652 | 447.718 |
| 7.00E+15 | 0.4  | 0.35 | 3.00E+17 | 0.577 | 108.957 |
| 7.00E+15 | 0.4  | 0.35 | 4.00E+17 | 0.628 | 149.392 |
| 7.00E+15 | 0.4  | 0.35 | 5.00E+17 | 0.652 | 198.839 |
| 7.00E+15 | 0.4  | 0.35 | 6.00E+17 | 0.670 | 256.574 |
| 7.00E+15 | 0.4  | 0.35 | 7.00E+17 | 0.685 | 323.006 |
| 7.00E+15 | 0.4  | 0.35 | 8.00E+17 | 0.699 | 397.626 |
| 7.00E+15 | 0.4  | 0.35 | 9.00E+17 | 0.711 | 477.157 |
| 7.00E+15 | 0.4  | 0.35 | 1.00E+18 | 0.716 | 556.931 |
| 7.00E+15 | 0.4  | 0.4  | 3.00E+17 | 0.641 | 123.766 |
| 7.00E+15 | 0.4  | 0.4  | 4.00E+17 | 0.695 | 174.433 |
| 7.00E+15 | 0.4  | 0.4  | 5.00E+17 | 0.712 | 236.440 |
| 7.00E+15 | 0.4  | 0.4  | 6.00E+17 | 0.739 | 309.392 |
| 7.00E+15 | 0.4  | 0.4  | 7.00E+17 | 0.745 | 393.270 |
| 7.00E+15 | 0.4  | 0.4  | 8.00E+17 | 0.772 | 483.384 |
| 7.00E+15 | 0.4  | 0.4  | 9.00E+17 | 0.782 | 573.971 |
| 7.00E+15 | 0.4  | 0.4  | 1.00E+18 | 0.794 | 663.944 |
| 7.00E+15 | 0.45 | 0.15 | 3.00E+17 | 0.384 | 57.613  |
| 7.00E+15 | 0.45 | 0.15 | 4.00E+17 | 0.410 | 71.139  |
| 7.00E+15 | 0.45 | 0.15 | 5.00E+17 | 0.442 | 85.424  |
| 7.00E+15 | 0.45 | 0.15 | 6.00E+17 | 0.469 | 100.560 |
| 7.00E+15 | 0.45 | 0.15 | 7.00E+17 | 0.482 | 116.862 |
| 7.00E+15 | 0.45 | 0.15 | 8.00E+17 | 0.488 | 134.849 |
| 7.00E+15 | 0.45 | 0.15 | 9.00E+17 | 0.495 | 154.866 |

|          |      |      |          |       |         |
|----------|------|------|----------|-------|---------|
| 7.00E+15 | 0.45 | 0.15 | 1.00E+18 | 0.504 | 176.597 |
| 7.00E+15 | 0.45 | 0.2  | 3.00E+17 | 0.445 | 72.067  |
| 7.00E+15 | 0.45 | 0.2  | 4.00E+17 | 0.490 | 91.853  |
| 7.00E+15 | 0.45 | 0.2  | 5.00E+17 | 0.524 | 113.544 |
| 7.00E+15 | 0.45 | 0.2  | 6.00E+17 | 0.535 | 138.234 |
| 7.00E+15 | 0.45 | 0.2  | 7.00E+17 | 0.543 | 166.664 |
| 7.00E+15 | 0.45 | 0.2  | 8.00E+17 | 0.553 | 198.285 |
| 7.00E+15 | 0.45 | 0.2  | 9.00E+17 | 0.567 | 233.034 |
| 7.00E+15 | 0.45 | 0.2  | 1.00E+18 | 0.578 | 271.153 |
| 7.00E+15 | 0.45 | 0.25 | 3.00E+17 | 0.518 | 86.456  |
| 7.00E+15 | 0.45 | 0.25 | 4.00E+17 | 0.567 | 113.010 |
| 7.00E+15 | 0.45 | 0.25 | 5.00E+17 | 0.586 | 144.300 |
| 7.00E+15 | 0.45 | 0.25 | 6.00E+17 | 0.613 | 181.087 |
| 7.00E+15 | 0.45 | 0.25 | 7.00E+17 | 0.626 | 223.034 |
| 7.00E+15 | 0.45 | 0.25 | 8.00E+17 | 0.633 | 270.071 |
| 7.00E+15 | 0.45 | 0.25 | 9.00E+17 | 0.651 | 322.079 |
| 7.00E+15 | 0.45 | 0.25 | 1.00E+18 | 0.663 | 379.074 |
| 7.00E+15 | 0.45 | 0.3  | 3.00E+17 | 0.580 | 101.090 |
| 7.00E+15 | 0.45 | 0.3  | 4.00E+17 | 0.628 | 136.391 |
| 7.00E+15 | 0.45 | 0.3  | 5.00E+17 | 0.673 | 179.605 |
| 7.00E+15 | 0.45 | 0.3  | 6.00E+17 | 0.686 | 230.215 |
| 7.00E+15 | 0.45 | 0.3  | 8.00E+17 | 0.723 | 352.924 |
| 7.00E+15 | 0.45 | 0.3  | 9.00E+17 | 0.733 | 424.523 |
| 7.00E+15 | 0.45 | 0.3  | 1.00E+18 | 0.742 | 498.786 |
| 7.00E+15 | 0.45 | 0.35 | 3.00E+17 | 0.659 | 116.626 |
| 7.00E+15 | 0.45 | 0.35 | 4.00E+17 | 0.722 | 162.774 |
| 7.00E+15 | 0.45 | 0.35 | 5.00E+17 | 0.736 | 218.976 |
| 7.00E+15 | 0.45 | 0.35 | 6.00E+17 | 0.773 | 285.125 |
| 7.00E+15 | 0.45 | 0.35 | 7.00E+17 | 0.791 | 360.929 |
| 7.00E+15 | 0.45 | 0.35 | 8.00E+17 | 0.810 | 445.037 |
| 7.00E+15 | 0.45 | 0.35 | 9.00E+17 | 0.822 | 530.941 |
| 7.00E+15 | 0.45 | 0.35 | 1.00E+18 | 0.838 | 616.602 |
| 7.00E+15 | 0.45 | 0.4  | 3.00E+17 | 0.732 | 133.561 |
| 7.00E+15 | 0.45 | 0.4  | 4.00E+17 | 0.795 | 191.668 |
| 7.00E+15 | 0.45 | 0.4  | 5.00E+17 | 0.840 | 262.116 |
| 7.00E+15 | 0.45 | 0.4  | 6.00E+17 | 0.853 | 346.053 |
| 7.00E+15 | 0.45 | 0.4  | 7.00E+17 | 0.879 | 440.982 |
| 7.00E+15 | 0.45 | 0.4  | 8.00E+17 | 0.902 | 538.468 |
| 7.00E+15 | 0.45 | 0.4  | 9.00E+17 | 0.927 | 536.737 |
| 7.00E+15 | 0.45 | 0.4  | 1.00E+18 | 0.938 | 577.246 |
| 7.00E+15 | 0.5  | 0.15 | 3.00E+17 | 0.402 | 108.990 |
| 7.00E+15 | 0.5  | 0.15 | 4.00E+17 | 0.431 | 129.706 |
| 7.00E+15 | 0.5  | 0.15 | 5.00E+17 | 0.472 | 153.880 |
| 7.00E+15 | 0.5  | 0.15 | 6.00E+17 | 0.506 | 178.386 |
| 7.00E+15 | 0.5  | 0.15 | 7.00E+17 | 0.529 | 151.462 |
| 7.00E+15 | 0.5  | 0.15 | 8.00E+17 | 0.537 | 160.868 |
| 7.00E+15 | 0.5  | 0.15 | 9.00E+17 | 0.547 | 173.019 |
| 7.00E+15 | 0.5  | 0.15 | 1.00E+18 | 0.556 | 183.175 |
| 7.00E+15 | 0.5  | 0.2  | 3.00E+17 | 0.479 | 132.400 |
| 7.00E+15 | 0.5  | 0.2  | 4.00E+17 | 0.537 | 166.250 |
| 7.00E+15 | 0.5  | 0.2  | 5.00E+17 | 0.579 | 203.599 |
| 7.00E+15 | 0.5  | 0.2  | 6.00E+17 | 0.601 | 245.685 |
| 7.00E+15 | 0.5  | 0.2  | 7.00E+17 | 0.615 | 292.744 |
| 7.00E+15 | 0.5  | 0.2  | 8.00E+17 | 0.627 | 343.904 |
| 7.00E+15 | 0.5  | 0.2  | 9.00E+17 | 0.642 | 399.687 |
| 7.00E+15 | 0.5  | 0.2  | 1.00E+18 | 0.654 | 458.726 |
| 7.00E+15 | 0.5  | 0.25 | 3.00E+17 | 0.578 | 158.683 |
| 7.00E+15 | 0.5  | 0.25 | 4.00E+17 | 0.634 | 206.069 |

|          |     |      |          |       |          |
|----------|-----|------|----------|-------|----------|
| 7.00E+15 | 0.5 | 0.25 | 5.00E+17 | 0.666 | 259.182  |
| 7.00E+15 | 0.5 | 0.25 | 6.00E+17 | 0.691 | 316.194  |
| 7.00E+15 | 0.5 | 0.25 | 7.00E+17 | 0.699 | 390.294  |
| 7.00E+15 | 0.5 | 0.25 | 8.00E+17 | 0.721 | 464.301  |
| 7.00E+15 | 0.5 | 0.25 | 9.00E+17 | 0.734 | 539.415  |
| 7.00E+15 | 0.5 | 0.25 | 1.00E+18 | 0.752 | 614.133  |
| 7.00E+15 | 0.5 | 0.3  | 3.00E+17 | 0.674 | 186.314  |
| 7.00E+15 | 0.5 | 0.3  | 4.00E+17 | 0.721 | 249.067  |
| 7.00E+15 | 0.5 | 0.3  | 5.00E+17 | 0.765 | 322.274  |
| 7.00E+15 | 0.5 | 0.3  | 6.00E+17 | 0.772 | 405.847  |
| 7.00E+15 | 0.5 | 0.3  | 9.00E+17 | 0.852 | 674.835  |
| 7.00E+15 | 0.5 | 0.3  | 1.00E+18 | 0.862 | 763.040  |
| 7.00E+15 | 0.5 | 0.35 | 3.00E+17 | 0.758 | 215.738  |
| 7.00E+15 | 0.5 | 0.35 | 4.00E+17 | 0.825 | 295.612  |
| 7.00E+15 | 0.5 | 0.35 | 5.00E+17 | 0.872 | 323.876  |
| 7.00E+15 | 0.5 | 0.35 | 6.00E+17 | 0.887 | 493.982  |
| 7.00E+15 | 0.5 | 0.35 | 7.00E+17 | 0.929 | 598.725  |
| 7.00E+15 | 0.5 | 0.35 | 8.00E+17 | 0.951 | 702.628  |
| 7.00E+15 | 0.5 | 0.35 | 9.00E+17 | 0.974 | 804.511  |
| 7.00E+15 | 0.5 | 0.35 | 1.00E+18 | 0.984 | 903.144  |
| 7.00E+15 | 0.5 | 0.4  | 3.00E+17 | 0.855 | 247.298  |
| 7.00E+15 | 0.5 | 0.4  | 4.00E+17 | 0.937 | 346.596  |
| 7.00E+15 | 0.5 | 0.4  | 5.00E+17 | 0.983 | 462.145  |
| 7.00E+15 | 0.5 | 0.4  | 7.00E+17 | 1.048 | 699.343  |
| 7.00E+15 | 0.5 | 0.4  | 8.00E+17 | 1.074 | 815.681  |
| 7.00E+15 | 0.5 | 0.4  | 9.00E+17 | 1.105 | 928.291  |
| 7.00E+15 | 0.5 | 0.4  | 1.00E+18 | 1.134 | 1035.480 |
| 7.00E+15 | 0.6 | 0.15 | 3.00E+17 | 0.442 | 113.417  |
| 7.00E+15 | 0.6 | 0.15 | 4.00E+17 | 0.483 | 135.216  |
| 7.00E+15 | 0.6 | 0.15 | 5.00E+17 | 0.546 | 156.245  |
| 7.00E+15 | 0.6 | 0.15 | 6.00E+17 | 0.606 | 191.453  |
| 7.00E+15 | 0.6 | 0.15 | 7.00E+17 | 0.640 | 223.346  |
| 7.00E+15 | 0.6 | 0.15 | 8.00E+17 | 0.670 | 258.361  |
| 7.00E+15 | 0.6 | 0.15 | 9.00E+17 | 0.687 | 295.876  |
| 7.00E+15 | 0.6 | 0.15 | 1.00E+18 | 0.700 | 336.493  |
| 7.00E+15 | 0.6 | 0.2  | 3.00E+17 | 0.555 | 138.634  |
| 7.00E+15 | 0.6 | 0.2  | 4.00E+17 | 0.650 | 175.368  |
| 7.00E+15 | 0.6 | 0.2  | 5.00E+17 | 0.722 | 218.992  |
| 7.00E+15 | 0.6 | 0.2  | 6.00E+17 | 0.762 | 266.884  |
| 7.00E+15 | 0.6 | 0.2  | 7.00E+17 | 0.785 | 320.228  |
| 7.00E+15 | 0.6 | 0.2  | 8.00E+17 | 0.811 | 378.983  |
| 7.00E+15 | 0.6 | 0.2  | 9.00E+17 | 0.828 | 441.810  |
| 7.00E+15 | 0.6 | 0.2  | 1.00E+18 | 0.846 | 504.262  |
| 7.00E+15 | 0.6 | 0.25 | 3.00E+17 | 0.708 | 169.095  |
| 7.00E+15 | 0.6 | 0.25 | 4.00E+17 | 0.806 | 222.243  |
| 7.00E+15 | 0.6 | 0.25 | 5.00E+17 | 0.874 | 284.156  |
| 7.00E+15 | 0.6 | 0.25 | 6.00E+17 | 0.908 | 354.881  |
| 7.00E+15 | 0.6 | 0.25 | 7.00E+17 | 0.932 | 433.474  |
| 7.00E+15 | 0.6 | 0.25 | 8.00E+17 | 0.970 | 512.510  |
| 7.00E+15 | 0.6 | 0.25 | 9.00E+17 | 0.985 | 595.969  |
| 7.00E+15 | 0.6 | 0.25 | 1.00E+18 | 1.023 | 676.677  |
| 7.00E+15 | 0.6 | 0.3  | 3.00E+17 | 0.866 | 201.337  |
| 7.00E+15 | 0.6 | 0.3  | 4.00E+17 | 0.964 | 273.122  |
| 7.00E+15 | 0.6 | 0.3  | 5.00E+17 | 1.045 | 247.581  |
| 7.00E+15 | 0.6 | 0.3  | 6.00E+17 | 1.075 | 452.786  |
| 7.00E+15 | 0.6 | 0.3  | 7.00E+17 | 1.115 | 548.515  |
| 7.00E+15 | 0.6 | 0.3  | 8.00E+17 | 1.160 | 648.567  |
| 7.00E+15 | 0.6 | 0.3  | 9.00E+17 | 1.192 | 744.974  |

|          |     |      |          |       |          |
|----------|-----|------|----------|-------|----------|
| 7.00E+15 | 0.6 | 0.35 | 3.00E+17 | 1.018 | 235.497  |
| 7.00E+15 | 0.6 | 0.35 | 4.00E+17 | 1.138 | 328.066  |
| 7.00E+15 | 0.6 | 0.35 | 5.00E+17 | 1.268 | 437.028  |
| 7.00E+15 | 0.6 | 0.35 | 6.00E+17 | 1.276 | 548.509  |
| 7.00E+15 | 0.6 | 0.35 | 7.00E+17 | 1.341 | 664.805  |
| 7.00E+15 | 0.6 | 0.35 | 8.00E+17 | 1.387 | 777.288  |
| 7.00E+15 | 0.6 | 0.35 | 9.00E+17 | 1.410 | 887.690  |
| 7.00E+15 | 0.6 | 0.35 | 1.00E+18 | 1.448 | 993.941  |
| 7.00E+15 | 0.6 | 0.4  | 3.00E+17 | 1.202 | 273.043  |
| 7.00E+15 | 0.6 | 0.4  | 4.00E+17 | 1.331 | 388.210  |
| 7.00E+15 | 0.6 | 0.4  | 5.00E+17 | 1.486 | 515.320  |
| 7.00E+15 | 0.6 | 0.4  | 6.00E+17 | 1.528 | 647.521  |
| 7.00E+15 | 0.6 | 0.4  | 7.00E+17 | 1.588 | 776.196  |
| 7.00E+15 | 0.6 | 0.4  | 8.00E+17 | 1.641 | 902.299  |
| 7.00E+15 | 0.6 | 0.4  | 9.00E+17 | 1.694 | 1023.360 |
| 7.00E+15 | 0.6 | 0.4  | 1.00E+18 | 1.744 | 1136.900 |
| 4.00E+15 | 0.2 | 0.15 | 3.00E+17 | 0.547 | 68.486   |
| 4.00E+15 | 0.2 | 0.15 | 4.00E+17 | 0.571 | 80.273   |
| 4.00E+15 | 0.2 | 0.15 | 5.00E+17 | 0.584 | 93.327   |
| 4.00E+15 | 0.2 | 0.15 | 6.00E+17 | 0.599 | 108.019  |
| 4.00E+15 | 0.2 | 0.15 | 7.00E+17 | 0.609 | 123.968  |
| 4.00E+15 | 0.2 | 0.15 | 8.00E+17 | 0.614 | 141.218  |
| 4.00E+15 | 0.2 | 0.15 | 9.00E+17 | 0.617 | 159.951  |
| 4.00E+15 | 0.2 | 0.15 | 1.00E+18 | 0.620 | 179.838  |
| 4.00E+15 | 0.2 | 0.2  | 3.00E+17 | 0.596 | 80.203   |
| 4.00E+15 | 0.2 | 0.2  | 4.00E+17 | 0.615 | 98.240   |
| 4.00E+15 | 0.2 | 0.2  | 5.00E+17 | 0.636 | 118.716  |
| 4.00E+15 | 0.2 | 0.2  | 6.00E+17 | 0.641 | 141.593  |
| 4.00E+15 | 0.2 | 0.2  | 7.00E+17 | 0.651 | 167.545  |
| 4.00E+15 | 0.2 | 0.2  | 8.00E+17 | 0.659 | 195.480  |
| 4.00E+15 | 0.2 | 0.2  | 9.00E+17 | 0.667 | 225.722  |
| 4.00E+15 | 0.2 | 0.2  | 1.00E+18 | 0.666 | 258.044  |
| 4.00E+15 | 0.2 | 0.25 | 3.00E+17 | 0.637 | 92.850   |
| 4.00E+15 | 0.2 | 0.25 | 4.00E+17 | 0.663 | 117.952  |
| 4.00E+15 | 0.2 | 0.25 | 5.00E+17 | 0.681 | 147.008  |
| 4.00E+15 | 0.2 | 0.25 | 6.00E+17 | 0.693 | 179.881  |
| 4.00E+15 | 0.2 | 0.25 | 7.00E+17 | 0.702 | 216.327  |
| 4.00E+15 | 0.2 | 0.25 | 8.00E+17 | 0.709 | 256.036  |
| 4.00E+15 | 0.2 | 0.25 | 9.00E+17 | 0.716 | 297.271  |
| 4.00E+15 | 0.2 | 0.25 | 1.00E+18 | 0.719 | 338.464  |
| 4.00E+15 | 0.2 | 0.3  | 3.00E+17 | 0.678 | 106.369  |
| 4.00E+15 | 0.2 | 0.3  | 4.00E+17 | 0.714 | 139.248  |
| 4.00E+15 | 0.2 | 0.3  | 5.00E+17 | 0.737 | 177.532  |
| 4.00E+15 | 0.2 | 0.3  | 6.00E+17 | 0.747 | 221.040  |
| 4.00E+15 | 0.2 | 0.3  | 7.00E+17 | 0.763 | 268.933  |
| 4.00E+15 | 0.2 | 0.3  | 8.00E+17 | 0.769 | 317.649  |
| 4.00E+15 | 0.2 | 0.3  | 9.00E+17 | 0.777 | 366.592  |
| 4.00E+15 | 0.2 | 0.3  | 1.00E+18 | 0.784 | 415.397  |
| 4.00E+15 | 0.2 | 0.35 | 3.00E+17 | 0.722 | 120.509  |
| 4.00E+15 | 0.2 | 0.35 | 4.00E+17 | 0.769 | 161.695  |
| 4.00E+15 | 0.2 | 0.35 | 5.00E+17 | 0.794 | 209.940  |
| 4.00E+15 | 0.2 | 0.35 | 6.00E+17 | 0.806 | 264.377  |
| 4.00E+15 | 0.2 | 0.35 | 7.00E+17 | 0.822 | 320.760  |
| 4.00E+15 | 0.2 | 0.35 | 8.00E+17 | 0.835 | 376.930  |
| 4.00E+15 | 0.2 | 0.35 | 9.00E+17 | 0.845 | 433.133  |
| 4.00E+15 | 0.2 | 0.35 | 1.00E+18 | 0.853 | 489.405  |
| 4.00E+15 | 0.2 | 0.4  | 3.00E+17 | 0.774 | 135.276  |
| 4.00E+15 | 0.2 | 0.4  | 4.00E+17 | 0.830 | 185.479  |

|          |      |      |          |       |         |
|----------|------|------|----------|-------|---------|
| 4.00E+15 | 0.2  | 0.4  | 5.00E+17 | 0.858 | 244.569 |
| 4.00E+15 | 0.2  | 0.4  | 6.00E+17 | 0.875 | 307.875 |
| 4.00E+15 | 0.2  | 0.4  | 7.00E+17 | 0.888 | 371.330 |
| 4.00E+15 | 0.2  | 0.4  | 8.00E+17 | 0.906 | 434.941 |
| 4.00E+15 | 0.2  | 0.4  | 9.00E+17 | 0.915 | 498.300 |
| 4.00E+15 | 0.2  | 0.4  | 1.00E+18 | 0.930 | 561.655 |
| 4.00E+15 | 0.25 | 0.15 | 3.00E+17 | 0.568 | 58.116  |
| 4.00E+15 | 0.25 | 0.15 | 4.00E+17 | 0.592 | 69.580  |
| 4.00E+15 | 0.25 | 0.15 | 5.00E+17 | 0.610 | 82.239  |
| 4.00E+15 | 0.25 | 0.15 | 6.00E+17 | 0.626 | 96.558  |
| 4.00E+15 | 0.25 | 0.15 | 7.00E+17 | 0.641 | 112.377 |
| 4.00E+15 | 0.25 | 0.15 | 8.00E+17 | 0.647 | 129.772 |
| 4.00E+15 | 0.25 | 0.15 | 9.00E+17 | 0.656 | 148.666 |
| 4.00E+15 | 0.25 | 0.15 | 1.00E+18 | 0.661 | 168.973 |
| 4.00E+15 | 0.25 | 0.2  | 3.00E+17 | 0.623 | 70.220  |
| 4.00E+15 | 0.25 | 0.2  | 4.00E+17 | 0.661 | 88.080  |
| 4.00E+15 | 0.25 | 0.2  | 5.00E+17 | 0.673 | 109.126 |
| 4.00E+15 | 0.25 | 0.2  | 6.00E+17 | 0.686 | 133.015 |
| 4.00E+15 | 0.25 | 0.2  | 7.00E+17 | 0.702 | 159.723 |
| 4.00E+15 | 0.25 | 0.2  | 8.00E+17 | 0.713 | 189.178 |
| 4.00E+15 | 0.25 | 0.2  | 9.00E+17 | 0.717 | 221.396 |
| 4.00E+15 | 0.25 | 0.2  | 1.00E+18 | 0.716 | 255.979 |
| 4.00E+15 | 0.25 | 0.25 | 3.00E+17 | 0.681 | 82.508  |
| 4.00E+15 | 0.25 | 0.25 | 4.00E+17 | 0.719 | 107.910 |
| 4.00E+15 | 0.25 | 0.25 | 5.00E+17 | 0.735 | 137.720 |
| 4.00E+15 | 0.25 | 0.25 | 6.00E+17 | 0.754 | 171.962 |
| 4.00E+15 | 0.25 | 0.25 | 7.00E+17 | 0.767 | 210.508 |
| 4.00E+15 | 0.25 | 0.25 | 8.00E+17 | 0.780 | 243.141 |
| 4.00E+15 | 0.25 | 0.25 | 9.00E+17 | 0.780 | 270.123 |
| 4.00E+15 | 0.25 | 0.25 | 1.00E+18 | 0.785 | 340.734 |
| 4.00E+15 | 0.25 | 0.3  | 3.00E+17 | 0.734 | 95.914  |
| 4.00E+15 | 0.25 | 0.3  | 4.00E+17 | 0.783 | 129.468 |
| 4.00E+15 | 0.25 | 0.3  | 5.00E+17 | 0.801 | 169.253 |
| 4.00E+15 | 0.25 | 0.3  | 6.00E+17 | 0.818 | 215.036 |
| 4.00E+15 | 0.25 | 0.3  | 7.00E+17 | 0.839 | 265.953 |
| 4.00E+15 | 0.25 | 0.3  | 8.00E+17 | 0.833 | 318.115 |
| 4.00E+15 | 0.25 | 0.3  | 9.00E+17 | 0.852 | 370.246 |
| 4.00E+15 | 0.25 | 0.3  | 1.00E+18 | 0.854 | 422.421 |
| 4.00E+15 | 0.25 | 0.35 | 3.00E+17 | 0.793 | 110.153 |
| 4.00E+15 | 0.25 | 0.35 | 4.00E+17 | 0.843 | 152.761 |
| 4.00E+15 | 0.25 | 0.35 | 5.00E+17 | 0.871 | 203.592 |
| 4.00E+15 | 0.25 | 0.35 | 6.00E+17 | 0.889 | 261.465 |
| 4.00E+15 | 0.25 | 0.35 | 7.00E+17 | 0.906 | 321.498 |
| 4.00E+15 | 0.25 | 0.35 | 8.00E+17 | 0.923 | 381.600 |
| 4.00E+15 | 0.25 | 0.35 | 9.00E+17 | 0.931 | 441.562 |
| 4.00E+15 | 0.25 | 0.35 | 1.00E+18 | 0.944 | 501.530 |
| 4.00E+15 | 0.25 | 0.4  | 3.00E+17 | 0.854 | 125.556 |
| 4.00E+15 | 0.25 | 0.4  | 4.00E+17 | 0.920 | 177.881 |
| 4.00E+15 | 0.25 | 0.4  | 5.00E+17 | 0.941 | 240.513 |
| 4.00E+15 | 0.25 | 0.4  | 6.00E+17 | 0.974 | 307.722 |
| 4.00E+15 | 0.25 | 0.4  | 7.00E+17 | 0.993 | 375.826 |
| 4.00E+15 | 0.25 | 0.4  | 8.00E+17 | 1.010 | 443.492 |
| 4.00E+15 | 0.25 | 0.4  | 9.00E+17 | 1.023 | 511.153 |
| 4.00E+15 | 0.25 | 0.4  | 1.00E+18 | 1.027 | 578.747 |
| 4.00E+15 | 0.3  | 0.15 | 3.00E+17 | 0.587 | 61.767  |
| 4.00E+15 | 0.3  | 0.15 | 4.00E+17 | 0.615 | 74.928  |
| 4.00E+15 | 0.3  | 0.15 | 5.00E+17 | 0.644 | 89.962  |
| 4.00E+15 | 0.3  | 0.15 | 6.00E+17 | 0.669 | 107.098 |

|          |      |      |          |       |         |
|----------|------|------|----------|-------|---------|
| 4.00E+15 | 0.3  | 0.15 | 7.00E+17 | 0.686 | 126.157 |
| 4.00E+15 | 0.3  | 0.15 | 8.00E+17 | 0.691 | 146.992 |
| 4.00E+15 | 0.3  | 0.15 | 9.00E+17 | 0.699 | 169.716 |
| 4.00E+15 | 0.3  | 0.15 | 1.00E+18 | 0.703 | 194.329 |
| 4.00E+15 | 0.3  | 0.2  | 3.00E+17 | 0.651 | 75.590  |
| 4.00E+15 | 0.3  | 0.2  | 4.00E+17 | 0.700 | 96.894  |
| 4.00E+15 | 0.3  | 0.2  | 5.00E+17 | 0.720 | 121.980 |
| 4.00E+15 | 0.3  | 0.2  | 6.00E+17 | 0.749 | 152.970 |
| 4.00E+15 | 0.3  | 0.2  | 7.00E+17 | 0.758 | 182.464 |
| 4.00E+15 | 0.3  | 0.2  | 8.00E+17 | 0.765 | 217.885 |
| 4.00E+15 | 0.3  | 0.2  | 9.00E+17 | 0.772 | 256.333 |
| 4.00E+15 | 0.3  | 0.2  | 1.00E+18 | 0.782 | 299.785 |
| 4.00E+15 | 0.3  | 0.25 | 3.00E+17 | 0.725 | 90.377  |
| 4.00E+15 | 0.3  | 0.25 | 4.00E+17 | 0.780 | 120.775 |
| 4.00E+15 | 0.3  | 0.25 | 5.00E+17 | 0.805 | 156.481 |
| 4.00E+15 | 0.3  | 0.25 | 6.00E+17 | 0.825 | 197.726 |
| 4.00E+15 | 0.3  | 0.25 | 7.00E+17 | 0.836 | 247.610 |
| 4.00E+15 | 0.3  | 0.25 | 8.00E+17 | 0.846 | 292.697 |
| 4.00E+15 | 0.3  | 0.25 | 9.00E+17 | 0.854 | 345.956 |
| 4.00E+15 | 0.3  | 0.25 | 1.00E+18 | 0.869 | 395.159 |
| 4.00E+15 | 0.3  | 0.3  | 3.00E+17 | 0.801 | 108.612 |
| 4.00E+15 | 0.3  | 0.3  | 4.00E+17 | 0.862 | 149.681 |
| 4.00E+15 | 0.3  | 0.3  | 5.00E+17 | 0.887 | 198.301 |
| 4.00E+15 | 0.3  | 0.3  | 6.00E+17 | 0.910 | 250.269 |
| 4.00E+15 | 0.3  | 0.3  | 7.00E+17 | 0.925 | 312.508 |
| 4.00E+15 | 0.3  | 0.3  | 8.00E+17 | 0.936 | 366.611 |
| 4.00E+15 | 0.3  | 0.3  | 9.00E+17 | 0.945 | 424.653 |
| 4.00E+15 | 0.3  | 0.3  | 1.00E+18 | 0.960 | 487.765 |
| 4.00E+15 | 0.3  | 0.35 | 3.00E+17 | 0.883 | 124.260 |
| 4.00E+15 | 0.3  | 0.35 | 4.00E+17 | 0.951 | 175.761 |
| 4.00E+15 | 0.3  | 0.35 | 5.00E+17 | 0.978 | 237.417 |
| 4.00E+15 | 0.3  | 0.35 | 6.00E+17 | 1.000 | 308.314 |
| 4.00E+15 | 0.3  | 0.35 | 7.00E+17 | 1.018 | 371.318 |
| 4.00E+15 | 0.3  | 0.35 | 8.00E+17 | 1.034 | 443.224 |
| 4.00E+15 | 0.3  | 0.35 | 9.00E+17 | 1.048 | 505.634 |
| 4.00E+15 | 0.3  | 0.35 | 1.00E+18 | 1.058 | 577.933 |
| 4.00E+15 | 0.3  | 0.4  | 3.00E+17 | 0.968 | 143.117 |
| 4.00E+15 | 0.3  | 0.4  | 4.00E+17 | 1.047 | 210.221 |
| 4.00E+15 | 0.3  | 0.4  | 5.00E+17 | 1.079 | 285.215 |
| 4.00E+15 | 0.3  | 0.4  | 6.00E+17 | 1.101 | 361.419 |
| 4.00E+15 | 0.3  | 0.4  | 7.00E+17 | 1.120 | 432.861 |
| 4.00E+15 | 0.3  | 0.4  | 8.00E+17 | 1.135 | 513.755 |
| 4.00E+15 | 0.3  | 0.4  | 9.00E+17 | 1.160 | 584.491 |
| 4.00E+15 | 0.3  | 0.4  | 1.00E+18 | 1.175 | 665.680 |
| 4.00E+15 | 0.35 | 0.15 | 3.00E+17 | 0.605 | 66.053  |
| 4.00E+15 | 0.35 | 0.15 | 4.00E+17 | 0.640 | 81.233  |
| 4.00E+15 | 0.35 | 0.15 | 5.00E+17 | 0.681 | 98.960  |
| 4.00E+15 | 0.35 | 0.15 | 6.00E+17 | 0.719 | 119.005 |
| 4.00E+15 | 0.35 | 0.15 | 7.00E+17 | 0.735 | 141.241 |
| 4.00E+15 | 0.35 | 0.15 | 8.00E+17 | 0.746 | 165.872 |
| 4.00E+15 | 0.35 | 0.15 | 9.00E+17 | 0.755 | 192.634 |
| 4.00E+15 | 0.35 | 0.15 | 1.00E+18 | 0.760 | 221.492 |
| 4.00E+15 | 0.35 | 0.2  | 3.00E+17 | 0.688 | 82.245  |
| 4.00E+15 | 0.35 | 0.2  | 4.00E+17 | 0.758 | 107.343 |
| 4.00E+15 | 0.35 | 0.2  | 5.00E+17 | 0.780 | 136.787 |
| 4.00E+15 | 0.35 | 0.2  | 6.00E+17 | 0.807 | 170.545 |
| 4.00E+15 | 0.35 | 0.2  | 7.00E+17 | 0.821 | 208.432 |
| 4.00E+15 | 0.35 | 0.2  | 8.00E+17 | 0.832 | 250.101 |

|          |      |      |          |       |         |
|----------|------|------|----------|-------|---------|
| 4.00E+15 | 0.35 | 0.2  | 9.00E+17 | 0.843 | 293.480 |
| 4.00E+15 | 0.35 | 0.2  | 1.00E+18 | 0.852 | 336.929 |
| 4.00E+15 | 0.35 | 0.25 | 3.00E+17 | 0.797 | 100.111 |
| 4.00E+15 | 0.35 | 0.25 | 4.00E+17 | 0.844 | 135.921 |
| 4.00E+15 | 0.35 | 0.25 | 5.00E+17 | 0.876 | 178.389 |
| 4.00E+15 | 0.35 | 0.25 | 6.00E+17 | 0.898 | 227.334 |
| 4.00E+15 | 0.35 | 0.25 | 7.00E+17 | 0.911 | 280.705 |
| 4.00E+15 | 0.35 | 0.25 | 8.00E+17 | 0.925 | 334.558 |
| 4.00E+15 | 0.35 | 0.25 | 9.00E+17 | 0.946 | 388.468 |
| 4.00E+15 | 0.35 | 0.25 | 1.00E+18 | 0.959 | 442.493 |
| 4.00E+15 | 0.35 | 0.3  | 3.00E+17 | 0.881 | 119.698 |
| 4.00E+15 | 0.35 | 0.3  | 4.00E+17 | 0.949 | 167.711 |
| 4.00E+15 | 0.35 | 0.3  | 5.00E+17 | 0.983 | 225.074 |
| 4.00E+15 | 0.35 | 0.3  | 6.00E+17 | 0.987 | 288.658 |
| 4.00E+15 | 0.35 | 0.3  | 7.00E+17 | 1.009 | 352.755 |
| 4.00E+15 | 0.35 | 0.3  | 8.00E+17 | 1.038 | 416.919 |
| 4.00E+15 | 0.35 | 0.3  | 9.00E+17 | 1.052 | 480.992 |
| 4.00E+15 | 0.35 | 0.3  | 1.00E+18 | 1.065 | 545.188 |
| 4.00E+15 | 0.35 | 0.35 | 3.00E+17 | 0.983 | 140.877 |
| 4.00E+15 | 0.35 | 0.35 | 4.00E+17 | 1.053 | 202.554 |
| 4.00E+15 | 0.35 | 0.35 | 5.00E+17 | 1.094 | 274.796 |
| 4.00E+15 | 0.35 | 0.35 | 6.00E+17 | 1.117 | 348.813 |
| 4.00E+15 | 0.35 | 0.35 | 7.00E+17 | 1.134 | 422.635 |
| 4.00E+15 | 0.35 | 0.35 | 8.00E+17 | 1.160 | 496.754 |
| 4.00E+15 | 0.35 | 0.35 | 9.00E+17 | 1.174 | 570.865 |
| 4.00E+15 | 0.35 | 0.35 | 1.00E+18 | 1.188 | 644.751 |
| 4.00E+15 | 0.35 | 0.4  | 3.00E+17 | 1.090 | 163.849 |
| 4.00E+15 | 0.35 | 0.4  | 4.00E+17 | 1.150 | 240.174 |
| 4.00E+15 | 0.35 | 0.4  | 5.00E+17 | 1.208 | 323.860 |
| 4.00E+15 | 0.35 | 0.4  | 6.00E+17 | 1.239 | 407.737 |
| 4.00E+15 | 0.35 | 0.4  | 7.00E+17 | 1.272 | 491.533 |
| 4.00E+15 | 0.35 | 0.4  | 8.00E+17 | 1.294 | 575.263 |
| 4.00E+15 | 0.35 | 0.4  | 9.00E+17 | 1.320 | 658.979 |
| 4.00E+15 | 0.35 | 0.4  | 1.00E+18 | 1.342 | 742.260 |
| 4.00E+15 | 0.4  | 0.15 | 3.00E+17 | 0.626 | 68.933  |
| 4.00E+15 | 0.4  | 0.15 | 4.00E+17 | 0.669 | 85.929  |
| 4.00E+15 | 0.4  | 0.15 | 5.00E+17 | 0.728 | 105.926 |
| 4.00E+15 | 0.4  | 0.15 | 6.00E+17 | 0.769 | 128.617 |
| 4.00E+15 | 0.4  | 0.15 | 7.00E+17 | 0.790 | 153.951 |
| 4.00E+15 | 0.4  | 0.15 | 8.00E+17 | 0.801 | 181.835 |
| 4.00E+15 | 0.4  | 0.15 | 9.00E+17 | 0.808 | 212.392 |
| 4.00E+15 | 0.4  | 0.15 | 1.00E+18 | 0.825 | 244.788 |
| 4.00E+15 | 0.4  | 0.2  | 3.00E+17 | 0.734 | 87.164  |
| 4.00E+15 | 0.4  | 0.2  | 4.00E+17 | 0.816 | 115.484 |
| 4.00E+15 | 0.4  | 0.2  | 5.00E+17 | 0.856 | 148.790 |
| 4.00E+15 | 0.4  | 0.2  | 6.00E+17 | 0.878 | 187.095 |
| 4.00E+15 | 0.4  | 0.2  | 7.00E+17 | 0.901 | 230.238 |
| 4.00E+15 | 0.4  | 0.2  | 8.00E+17 | 0.913 | 276.575 |
| 4.00E+15 | 0.4  | 0.2  | 9.00E+17 | 0.925 | 323.272 |
| 4.00E+15 | 0.4  | 0.2  | 1.00E+18 | 0.943 | 369.961 |
| 4.00E+15 | 0.4  | 0.25 | 3.00E+17 | 0.866 | 107.508 |
| 4.00E+15 | 0.4  | 0.25 | 4.00E+17 | 0.937 | 148.275 |
| 4.00E+15 | 0.4  | 0.25 | 5.00E+17 | 0.970 | 196.804 |
| 4.00E+15 | 0.4  | 0.25 | 6.00E+17 | 0.989 | 252.222 |
| 4.00E+15 | 0.4  | 0.25 | 7.00E+17 | 1.012 | 310.404 |
| 4.00E+15 | 0.4  | 0.25 | 8.00E+17 | 1.029 | 368.583 |
| 4.00E+15 | 0.4  | 0.25 | 9.00E+17 | 1.050 | 426.761 |
| 4.00E+15 | 0.4  | 0.25 | 1.00E+18 | 1.068 | 484.880 |

|          |      |      |          |       |         |
|----------|------|------|----------|-------|---------|
| 4.00E+15 | 0.4  | 0.3  | 3.00E+17 | 0.986 | 130.024 |
| 4.00E+15 | 0.4  | 0.3  | 4.00E+17 | 1.051 | 184.993 |
| 4.00E+15 | 0.4  | 0.3  | 5.00E+17 | 1.092 | 250.322 |
| 4.00E+15 | 0.4  | 0.3  | 6.00E+17 | 1.116 | 319.621 |
| 4.00E+15 | 0.4  | 0.3  | 7.00E+17 | 1.142 | 358.271 |
| 4.00E+15 | 0.4  | 0.3  | 8.00E+17 | 1.162 | 458.112 |
| 4.00E+15 | 0.4  | 0.3  | 9.00E+17 | 1.172 | 527.532 |
| 4.00E+15 | 0.4  | 0.3  | 1.00E+18 | 1.189 | 596.727 |
| 4.00E+15 | 0.4  | 0.35 | 3.00E+17 | 1.095 | 154.750 |
| 4.00E+15 | 0.4  | 0.35 | 4.00E+17 | 1.172 | 225.528 |
| 4.00E+15 | 0.4  | 0.35 | 5.00E+17 | 1.215 | 305.252 |
| 4.00E+15 | 0.4  | 0.35 | 6.00E+17 | 1.242 | 385.423 |
| 4.00E+15 | 0.4  | 0.35 | 7.00E+17 | 1.275 | 465.648 |
| 4.00E+15 | 0.4  | 0.35 | 8.00E+17 | 1.295 | 545.847 |
| 4.00E+15 | 0.4  | 0.35 | 9.00E+17 | 1.321 | 625.906 |
| 4.00E+15 | 0.4  | 0.35 | 1.00E+18 | 1.336 | 705.753 |
| 4.00E+15 | 0.4  | 0.4  | 3.00E+17 | 1.226 | 181.572 |
| 4.00E+15 | 0.4  | 0.4  | 4.00E+17 | 1.314 | 268.426 |
| 4.00E+15 | 0.4  | 0.4  | 5.00E+17 | 1.366 | 359.196 |
| 4.00E+15 | 0.4  | 0.4  | 6.00E+17 | 1.408 | 450.143 |
| 4.00E+15 | 0.4  | 0.4  | 7.00E+17 | 1.438 | 540.943 |
| 4.00E+15 | 0.4  | 0.4  | 8.00E+17 | 1.472 | 631.851 |
| 4.00E+15 | 0.4  | 0.4  | 9.00E+17 | 1.496 | 722.111 |
| 4.00E+15 | 0.4  | 0.4  | 1.00E+18 | 1.530 | 812.114 |
| 4.00E+15 | 0.45 | 0.15 | 3.00E+17 | 0.649 | 71.983  |
| 4.00E+15 | 0.45 | 0.15 | 4.00E+17 | 0.700 | 91.105  |
| 4.00E+15 | 0.45 | 0.15 | 5.00E+17 | 0.775 | 113.386 |
| 4.00E+15 | 0.45 | 0.15 | 6.00E+17 | 0.825 | 138.859 |
| 4.00E+15 | 0.45 | 0.15 | 7.00E+17 | 0.858 | 167.391 |
| 4.00E+15 | 0.45 | 0.15 | 8.00E+17 | 0.870 | 198.919 |
| 4.00E+15 | 0.45 | 0.15 | 9.00E+17 | 0.880 | 233.305 |
| 4.00E+15 | 0.45 | 0.15 | 1.00E+18 | 0.895 | 269.550 |
| 4.00E+15 | 0.45 | 0.2  | 3.00E+17 | 0.783 | 92.596  |
| 4.00E+15 | 0.45 | 0.2  | 4.00E+17 | 0.880 | 124.341 |
| 4.00E+15 | 0.45 | 0.2  | 5.00E+17 | 0.907 | 161.935 |
| 4.00E+15 | 0.45 | 0.2  | 6.00E+17 | 0.956 | 205.125 |
| 4.00E+15 | 0.45 | 0.2  | 7.00E+17 | 0.971 | 253.435 |
| 4.00E+15 | 0.45 | 0.2  | 8.00E+17 | 0.995 | 303.524 |
| 4.00E+15 | 0.45 | 0.2  | 9.00E+17 | 1.017 | 353.544 |
| 4.00E+15 | 0.45 | 0.2  | 1.00E+18 | 1.034 | 403.745 |
| 4.00E+15 | 0.45 | 0.25 | 3.00E+17 | 0.926 | 115.547 |
| 4.00E+15 | 0.45 | 0.25 | 4.00E+17 | 1.023 | 161.471 |
| 4.00E+15 | 0.45 | 0.25 | 5.00E+17 | 1.057 | 216.197 |
| 4.00E+15 | 0.45 | 0.25 | 6.00E+17 | 1.099 | 277.727 |
| 4.00E+15 | 0.45 | 0.25 | 7.00E+17 | 1.107 | 339.992 |
| 4.00E+15 | 0.45 | 0.25 | 8.00E+17 | 1.145 | 402.347 |
| 4.00E+15 | 0.45 | 0.25 | 9.00E+17 | 1.167 | 464.719 |
| 4.00E+15 | 0.45 | 0.25 | 1.00E+18 | 1.185 | 527.057 |
| 4.00E+15 | 0.45 | 0.3  | 3.00E+17 | 1.068 | 141.192 |
| 4.00E+15 | 0.45 | 0.3  | 4.00E+17 | 1.165 | 203.343 |
| 4.00E+15 | 0.45 | 0.3  | 5.00E+17 | 1.206 | 276.013 |
| 4.00E+15 | 0.45 | 0.3  | 6.00E+17 | 1.240 | 350.398 |
| 4.00E+15 | 0.45 | 0.3  | 7.00E+17 | 1.291 | 424.667 |
| 4.00E+15 | 0.45 | 0.3  | 8.00E+17 | 1.314 | 499.015 |
| 4.00E+15 | 0.45 | 0.3  | 9.00E+17 | 1.331 | 573.394 |
| 4.00E+15 | 0.45 | 0.3  | 1.00E+18 | 1.345 | 647.570 |
| 4.00E+15 | 0.45 | 0.35 | 3.00E+17 | 1.215 | 169.268 |
| 4.00E+15 | 0.45 | 0.35 | 4.00E+17 | 1.322 | 249.236 |



|          |      |      |          |       |          |
|----------|------|------|----------|-------|----------|
| 4.00E+15 | 0.45 | 0.35 | 5.00E+17 | 1.393 | 335.258  |
| 4.00E+15 | 0.45 | 0.35 | 6.00E+17 | 1.427 | 421.325  |
| 4.00E+15 | 0.45 | 0.35 | 7.00E+17 | 1.474 | 507.446  |
| 4.00E+15 | 0.45 | 0.35 | 8.00E+17 | 1.501 | 593.421  |
| 4.00E+15 | 0.45 | 0.35 | 9.00E+17 | 1.523 | 568.886  |
| 4.00E+15 | 0.45 | 0.35 | 1.00E+18 | 1.558 | 765.080  |
| 4.00E+15 | 0.45 | 0.4  | 3.00E+17 | 1.383 | 200.031  |
| 4.00E+15 | 0.45 | 0.4  | 4.00E+17 | 1.511 | 295.996  |
| 4.00E+15 | 0.45 | 0.4  | 5.00E+17 | 1.602 | 393.670  |
| 4.00E+15 | 0.45 | 0.4  | 6.00E+17 | 1.650 | 491.226  |
| 4.00E+15 | 0.45 | 0.4  | 7.00E+17 | 1.684 | 588.903  |
| 4.00E+15 | 0.45 | 0.4  | 8.00E+17 | 1.715 | 686.339  |
| 4.00E+15 | 0.45 | 0.4  | 9.00E+17 | 1.776 | 783.745  |
| 4.00E+15 | 0.45 | 0.4  | 1.00E+18 | 1.814 | 878.669  |
| 4.00E+15 | 0.5  | 0.15 | 3.00E+17 | 0.670 | 150.519  |
| 4.00E+15 | 0.5  | 0.15 | 4.00E+17 | 0.728 | 180.825  |
| 4.00E+15 | 0.5  | 0.15 | 5.00E+17 | 0.825 | 200.088  |
| 4.00E+15 | 0.5  | 0.15 | 6.00E+17 | 0.885 | 219.830  |
| 4.00E+15 | 0.5  | 0.15 | 7.00E+17 | 0.928 | 232.942  |
| 4.00E+15 | 0.5  | 0.15 | 8.00E+17 | 0.947 | 249.588  |
| 4.00E+15 | 0.5  | 0.15 | 9.00E+17 | 0.966 | 402.380  |
| 4.00E+15 | 0.5  | 0.15 | 1.00E+18 | 0.984 | 446.119  |
| 4.00E+15 | 0.5  | 0.2  | 3.00E+17 | 0.826 | 190.383  |
| 4.00E+15 | 0.5  | 0.2  | 4.00E+17 | 0.947 | 246.374  |
| 4.00E+15 | 0.5  | 0.2  | 5.00E+17 | 1.025 | 305.903  |
| 4.00E+15 | 0.5  | 0.2  | 6.00E+17 | 1.050 | 367.977  |
| 4.00E+15 | 0.5  | 0.2  | 7.00E+17 | 1.084 | 427.655  |
| 4.00E+15 | 0.5  | 0.2  | 8.00E+17 | 1.104 | 487.716  |
| 4.00E+15 | 0.5  | 0.2  | 9.00E+17 | 1.128 | 547.439  |
| 4.00E+15 | 0.5  | 0.2  | 1.00E+18 | 1.150 | 607.415  |
| 4.00E+15 | 0.5  | 0.25 | 3.00E+17 | 1.009 | 236.246  |
| 4.00E+15 | 0.5  | 0.25 | 4.00E+17 | 1.128 | 308.914  |
| 4.00E+15 | 0.5  | 0.25 | 5.00E+17 | 1.185 | 386.394  |
| 4.00E+15 | 0.5  | 0.25 | 6.00E+17 | 1.223 | 461.528  |
| 4.00E+15 | 0.5  | 0.25 | 7.00E+17 | 1.263 | 537.128  |
| 4.00E+15 | 0.5  | 0.25 | 8.00E+17 | 1.299 | 611.997  |
| 4.00E+15 | 0.5  | 0.25 | 9.00E+17 | 1.322 | 687.745  |
| 4.00E+15 | 0.5  | 0.25 | 1.00E+18 | 1.354 | 762.409  |
| 4.00E+15 | 0.5  | 0.3  | 3.00E+17 | 1.205 | 279.639  |
| 4.00E+15 | 0.5  | 0.3  | 4.00E+17 | 1.300 | 307.467  |
| 4.00E+15 | 0.5  | 0.3  | 5.00E+17 | 1.385 | 462.531  |
| 4.00E+15 | 0.5  | 0.3  | 6.00E+17 | 1.407 | 552.675  |
| 4.00E+15 | 0.5  | 0.3  | 7.00E+17 | 1.470 | 643.275  |
| 4.00E+15 | 0.5  | 0.3  | 8.00E+17 | 1.504 | 733.219  |
| 4.00E+15 | 0.5  | 0.35 | 3.00E+17 | 1.372 | 323.862  |
| 4.00E+15 | 0.5  | 0.35 | 4.00E+17 | 1.503 | 430.836  |
| 4.00E+15 | 0.5  | 0.35 | 5.00E+17 | 1.613 | 536.210  |
| 4.00E+15 | 0.5  | 0.35 | 6.00E+17 | 1.658 | 641.040  |
| 4.00E+15 | 0.5  | 0.35 | 7.00E+17 | 1.710 | 746.073  |
| 4.00E+15 | 0.5  | 0.35 | 8.00E+17 | 1.741 | 849.622  |
| 4.00E+15 | 0.5  | 0.35 | 9.00E+17 | 1.778 | 951.377  |
| 4.00E+15 | 0.5  | 0.4  | 3.00E+17 | 1.593 | 369.671  |
| 4.00E+15 | 0.5  | 0.4  | 4.00E+17 | 1.744 | 488.852  |
| 4.00E+15 | 0.5  | 0.4  | 5.00E+17 | 1.910 | 608.359  |
| 4.00E+15 | 0.5  | 0.4  | 6.00E+17 | 1.942 | 727.699  |
| 4.00E+15 | 0.5  | 0.4  | 7.00E+17 | 2.002 | 845.900  |
| 4.00E+15 | 0.5  | 0.4  | 8.00E+17 | 2.047 | 961.737  |
| 4.00E+15 | 0.5  | 0.4  | 9.00E+17 | 2.104 | 1074.390 |

|          |     |      |          |       |          |
|----------|-----|------|----------|-------|----------|
| 4.00E+15 | 0.5 | 0.4  | 1.00E+18 | 2.171 | 1178.570 |
| 4.00E+15 | 0.6 | 0.15 | 3.00E+17 | 0.717 | 159.669  |
| 4.00E+15 | 0.6 | 0.15 | 4.00E+17 | 0.784 | 197.747  |
| 4.00E+15 | 0.6 | 0.15 | 5.00E+17 | 0.932 | 242.243  |
| 4.00E+15 | 0.6 | 0.15 | 6.00E+17 | 1.035 | 289.226  |
| 4.00E+15 | 0.6 | 0.15 | 7.00E+17 | 1.106 | 317.337  |
| 4.00E+15 | 0.6 | 0.15 | 8.00E+17 | 1.157 | 339.628  |
| 4.00E+15 | 0.6 | 0.15 | 9.00E+17 | 1.184 | 357.172  |
| 4.00E+15 | 0.6 | 0.15 | 1.00E+18 | 1.213 | 372.624  |
| 4.00E+15 | 0.6 | 0.2  | 3.00E+17 | 0.949 | 203.220  |
| 4.00E+15 | 0.6 | 0.2  | 4.00E+17 | 1.129 | 265.312  |
| 4.00E+15 | 0.6 | 0.2  | 5.00E+17 | 1.263 | 332.161  |
| 4.00E+15 | 0.6 | 0.2  | 6.00E+17 | 1.315 | 396.623  |
| 4.00E+15 | 0.6 | 0.2  | 7.00E+17 | 1.359 | 461.493  |
| 4.00E+15 | 0.6 | 0.2  | 8.00E+17 | 1.408 | 525.855  |
| 4.00E+15 | 0.6 | 0.2  | 9.00E+17 | 1.452 | 590.593  |
| 4.00E+15 | 0.6 | 0.25 | 3.00E+17 | 1.249 | 252.651  |
| 4.00E+15 | 0.6 | 0.25 | 4.00E+17 | 1.420 | 336.473  |
| 4.00E+15 | 0.6 | 0.25 | 5.00E+17 | 1.563 | 417.657  |
| 4.00E+15 | 0.6 | 0.25 | 6.00E+17 | 1.586 | 499.249  |
| 4.00E+15 | 0.6 | 0.25 | 7.00E+17 | 1.658 | 580.857  |
| 4.00E+15 | 0.6 | 0.25 | 8.00E+17 | 1.727 | 662.479  |
| 4.00E+15 | 0.6 | 0.25 | 9.00E+17 | 1.765 | 743.940  |
| 4.00E+15 | 0.6 | 0.25 | 1.00E+18 | 1.801 | 824.596  |
| 4.00E+15 | 0.6 | 0.3  | 3.00E+17 | 1.534 | 303.272  |
| 4.00E+15 | 0.6 | 0.3  | 4.00E+17 | 1.717 | 403.384  |
| 4.00E+15 | 0.6 | 0.3  | 5.00E+17 | 1.878 | 501.664  |
| 4.00E+15 | 0.6 | 0.3  | 7.00E+17 | 2.036 | 697.916  |
| 4.00E+15 | 0.6 | 0.3  | 8.00E+17 | 2.099 | 795.282  |
| 4.00E+15 | 0.6 | 0.3  | 9.00E+17 | 2.144 | 892.508  |
| 4.00E+15 | 0.6 | 0.3  | 1.00E+18 | 2.180 | 986.931  |
| 4.00E+15 | 0.6 | 0.35 | 3.00E+17 | 1.845 | 354.686  |
| 4.00E+15 | 0.6 | 0.35 | 4.00E+17 | 2.075 | 468.652  |
| 4.00E+15 | 0.6 | 0.35 | 5.00E+17 | 2.372 | 582.929  |
| 4.00E+15 | 0.6 | 0.35 | 6.00E+17 | 2.401 | 697.271  |
| 4.00E+15 | 0.6 | 0.35 | 7.00E+17 | 2.494 | 673.538  |
| 4.00E+15 | 0.6 | 0.35 | 8.00E+17 | 2.570 | 924.294  |
| 4.00E+15 | 0.6 | 0.35 | 9.00E+17 | 2.660 | 1033.760 |
| 4.00E+15 | 0.6 | 0.35 | 1.00E+18 | 2.753 | 1139.480 |
| 4.00E+15 | 0.6 | 0.4  | 3.00E+17 | 2.225 | 402.986  |
| 4.00E+15 | 0.6 | 0.4  | 4.00E+17 | 2.531 | 533.182  |
| 4.00E+15 | 0.6 | 0.4  | 5.00E+17 | 2.925 | 663.342  |
| 4.00E+15 | 0.6 | 0.4  | 6.00E+17 | 2.981 | 793.437  |
| 4.00E+15 | 0.6 | 0.4  | 7.00E+17 | 3.110 | 922.080  |
| 4.00E+15 | 0.6 | 0.4  | 9.00E+17 | 3.391 | 1168.330 |
| 4.00E+15 | 0.6 | 0.4  | 1.00E+18 | 3.499 | 1277.210 |
| 6.00E+15 | 0.2 | 0.15 | 3.00E+17 | 0.372 | 58.805   |
| 6.00E+15 | 0.2 | 0.15 | 4.00E+17 | 0.384 | 68.694   |
| 6.00E+15 | 0.2 | 0.15 | 5.00E+17 | 0.392 | 79.032   |
| 6.00E+15 | 0.2 | 0.15 | 6.00E+17 | 0.397 | 89.682   |
| 6.00E+15 | 0.2 | 0.15 | 7.00E+17 | 0.405 | 100.754  |
| 6.00E+15 | 0.2 | 0.15 | 8.00E+17 | 0.407 | 112.329  |
| 6.00E+15 | 0.2 | 0.15 | 9.00E+17 | 0.410 | 124.823  |
| 6.00E+15 | 0.2 | 0.15 | 1.00E+18 | 0.412 | 138.144  |
| 6.00E+15 | 0.2 | 0.2  | 3.00E+17 | 0.397 | 68.718   |
| 6.00E+15 | 0.2 | 0.2  | 4.00E+17 | 0.409 | 82.567   |
| 6.00E+15 | 0.2 | 0.2  | 5.00E+17 | 0.419 | 97.160   |
| 6.00E+15 | 0.2 | 0.2  | 6.00E+17 | 0.426 | 112.689  |

|          |      |      |          |       |         |
|----------|------|------|----------|-------|---------|
| 6.00E+15 | 0.2  | 0.2  | 7.00E+17 | 0.428 | 128.421 |
| 6.00E+15 | 0.2  | 0.2  | 8.00E+17 | 0.432 | 142.267 |
| 6.00E+15 | 0.2  | 0.2  | 9.00E+17 | 0.433 | 156.373 |
| 6.00E+15 | 0.2  | 0.2  | 1.00E+18 | 0.435 | 167.863 |
| 6.00E+15 | 0.2  | 0.25 | 3.00E+17 | 0.418 | 78.518  |
| 6.00E+15 | 0.2  | 0.25 | 4.00E+17 | 0.433 | 96.389  |
| 6.00E+15 | 0.2  | 0.25 | 5.00E+17 | 0.442 | 115.818 |
| 6.00E+15 | 0.2  | 0.25 | 6.00E+17 | 0.447 | 137.707 |
| 6.00E+15 | 0.2  | 0.25 | 7.00E+17 | 0.451 | 162.338 |
| 6.00E+15 | 0.2  | 0.25 | 8.00E+17 | 0.457 | 188.203 |
| 6.00E+15 | 0.2  | 0.25 | 9.00E+17 | 0.459 | 219.475 |
| 6.00E+15 | 0.2  | 0.25 | 1.00E+18 | 0.462 | 249.711 |
| 6.00E+15 | 0.2  | 0.3  | 3.00E+17 | 0.444 | 88.111  |
| 6.00E+15 | 0.2  | 0.3  | 4.00E+17 | 0.455 | 110.345 |
| 6.00E+15 | 0.2  | 0.3  | 5.00E+17 | 0.466 | 135.856 |
| 6.00E+15 | 0.2  | 0.3  | 6.00E+17 | 0.475 | 165.241 |
| 6.00E+15 | 0.2  | 0.3  | 7.00E+17 | 0.480 | 198.369 |
| 6.00E+15 | 0.2  | 0.3  | 8.00E+17 | 0.484 | 233.037 |
| 6.00E+15 | 0.2  | 0.3  | 9.00E+17 | 0.490 | 272.926 |
| 6.00E+15 | 0.2  | 0.3  | 1.00E+18 | 0.493 | 316.336 |
| 6.00E+15 | 0.2  | 0.35 | 3.00E+17 | 0.466 | 97.560  |
| 6.00E+15 | 0.2  | 0.35 | 4.00E+17 | 0.482 | 125.090 |
| 6.00E+15 | 0.2  | 0.35 | 5.00E+17 | 0.497 | 157.370 |
| 6.00E+15 | 0.2  | 0.35 | 6.00E+17 | 0.503 | 194.833 |
| 6.00E+15 | 0.2  | 0.35 | 7.00E+17 | 0.513 | 198.896 |
| 6.00E+15 | 0.2  | 0.35 | 8.00E+17 | 0.517 | 283.421 |
| 6.00E+15 | 0.2  | 0.35 | 9.00E+17 | 0.523 | 332.633 |
| 6.00E+15 | 0.2  | 0.35 | 1.00E+18 | 0.525 | 387.733 |
| 6.00E+15 | 0.2  | 0.4  | 3.00E+17 | 0.489 | 107.083 |
| 6.00E+15 | 0.2  | 0.4  | 4.00E+17 | 0.513 | 140.534 |
| 6.00E+15 | 0.2  | 0.4  | 5.00E+17 | 0.524 | 180.599 |
| 6.00E+15 | 0.2  | 0.4  | 6.00E+17 | 0.537 | 226.346 |
| 6.00E+15 | 0.2  | 0.4  | 7.00E+17 | 0.546 | 278.338 |
| 6.00E+15 | 0.2  | 0.4  | 8.00E+17 | 0.549 | 336.282 |
| 6.00E+15 | 0.2  | 0.4  | 9.00E+17 | 0.555 | 396.577 |
| 6.00E+15 | 0.2  | 0.4  | 1.00E+18 | 0.563 | 461.955 |
| 6.00E+15 | 0.25 | 0.15 | 3.00E+17 | 0.382 | 50.064  |
| 6.00E+15 | 0.25 | 0.15 | 4.00E+17 | 0.397 | 59.826  |
| 6.00E+15 | 0.25 | 0.15 | 5.00E+17 | 0.407 | 70.160  |
| 6.00E+15 | 0.25 | 0.15 | 6.00E+17 | 0.416 | 80.897  |
| 6.00E+15 | 0.25 | 0.15 | 7.00E+17 | 0.422 | 92.075  |
| 6.00E+15 | 0.25 | 0.15 | 8.00E+17 | 0.428 | 103.701 |
| 6.00E+15 | 0.25 | 0.15 | 9.00E+17 | 0.430 | 116.296 |
| 6.00E+15 | 0.25 | 0.15 | 1.00E+18 | 0.434 | 129.815 |
| 6.00E+15 | 0.25 | 0.2  | 3.00E+17 | 0.416 | 60.350  |
| 6.00E+15 | 0.25 | 0.2  | 4.00E+17 | 0.430 | 74.646  |
| 6.00E+15 | 0.25 | 0.2  | 5.00E+17 | 0.447 | 89.696  |
| 6.00E+15 | 0.25 | 0.2  | 6.00E+17 | 0.453 | 105.667 |
| 6.00E+15 | 0.25 | 0.2  | 7.00E+17 | 0.453 | 123.436 |
| 6.00E+15 | 0.25 | 0.2  | 8.00E+17 | 0.457 | 143.327 |
| 6.00E+15 | 0.25 | 0.2  | 9.00E+17 | 0.460 | 165.047 |
| 6.00E+15 | 0.25 | 0.2  | 1.00E+18 | 0.465 | 188.794 |
| 6.00E+15 | 0.25 | 0.25 | 3.00E+17 | 0.447 | 70.234  |
| 6.00E+15 | 0.25 | 0.25 | 4.00E+17 | 0.467 | 88.601  |
| 6.00E+15 | 0.25 | 0.25 | 5.00E+17 | 0.476 | 108.545 |
| 6.00E+15 | 0.25 | 0.25 | 6.00E+17 | 0.486 | 131.273 |
| 6.00E+15 | 0.25 | 0.25 | 7.00E+17 | 0.488 | 157.218 |
| 6.00E+15 | 0.25 | 0.25 | 8.00E+17 | 0.496 | 186.123 |

|          |      |      |          |       |         |
|----------|------|------|----------|-------|---------|
| 6.00E+15 | 0.25 | 0.25 | 9.00E+17 | 0.503 | 217.876 |
| 6.00E+15 | 0.25 | 0.25 | 1.00E+18 | 0.506 | 252.559 |
| 6.00E+15 | 0.25 | 0.3  | 3.00E+17 | 0.473 | 79.934  |
| 6.00E+15 | 0.25 | 0.3  | 4.00E+17 | 0.492 | 102.705 |
| 6.00E+15 | 0.25 | 0.3  | 5.00E+17 | 0.506 | 129.057 |
| 6.00E+15 | 0.25 | 0.3  | 6.00E+17 | 0.518 | 159.910 |
| 6.00E+15 | 0.25 | 0.3  | 7.00E+17 | 0.524 | 194.818 |
| 6.00E+15 | 0.25 | 0.3  | 8.00E+17 | 0.533 | 233.910 |
| 6.00E+15 | 0.25 | 0.3  | 9.00E+17 | 0.534 | 277.002 |
| 6.00E+15 | 0.25 | 0.3  | 1.00E+18 | 0.544 | 324.019 |
| 6.00E+15 | 0.25 | 0.35 | 3.00E+17 | 0.504 | 89.552  |
| 6.00E+15 | 0.25 | 0.35 | 4.00E+17 | 0.535 | 117.667 |
| 6.00E+15 | 0.25 | 0.35 | 5.00E+17 | 0.549 | 151.657 |
| 6.00E+15 | 0.25 | 0.35 | 6.00E+17 | 0.560 | 191.204 |
| 6.00E+15 | 0.25 | 0.35 | 7.00E+17 | 0.566 | 236.295 |
| 6.00E+15 | 0.25 | 0.35 | 8.00E+17 | 0.574 | 286.828 |
| 6.00E+15 | 0.25 | 0.35 | 9.00E+17 | 0.578 | 342.520 |
| 6.00E+15 | 0.25 | 0.35 | 1.00E+18 | 0.586 | 401.785 |
| 6.00E+15 | 0.25 | 0.4  | 3.00E+17 | 0.529 | 99.371  |
| 6.00E+15 | 0.25 | 0.4  | 4.00E+17 | 0.568 | 134.145 |
| 6.00E+15 | 0.25 | 0.4  | 5.00E+17 | 0.591 | 176.251 |
| 6.00E+15 | 0.25 | 0.4  | 6.00E+17 | 0.598 | 225.340 |
| 6.00E+15 | 0.25 | 0.4  | 7.00E+17 | 0.612 | 281.603 |
| 6.00E+15 | 0.25 | 0.4  | 8.00E+17 | 0.618 | 344.444 |
| 6.00E+15 | 0.25 | 0.4  | 9.00E+17 | 0.623 | 370.570 |
| 6.00E+15 | 0.25 | 0.4  | 1.00E+18 | 0.628 | 479.038 |
| 6.00E+15 | 0.3  | 0.15 | 3.00E+17 | 0.395 | 53.020  |
| 6.00E+15 | 0.3  | 0.15 | 4.00E+17 | 0.411 | 64.087  |
| 6.00E+15 | 0.3  | 0.15 | 5.00E+17 | 0.428 | 75.795  |
| 6.00E+15 | 0.3  | 0.15 | 6.00E+17 | 0.439 | 87.970  |
| 6.00E+15 | 0.3  | 0.15 | 7.00E+17 | 0.447 | 100.751 |
| 6.00E+15 | 0.3  | 0.15 | 8.00E+17 | 0.453 | 114.700 |
| 6.00E+15 | 0.3  | 0.15 | 9.00E+17 | 0.456 | 129.812 |
| 6.00E+15 | 0.3  | 0.15 | 1.00E+18 | 0.460 | 146.473 |
| 6.00E+15 | 0.3  | 0.2  | 3.00E+17 | 0.435 | 64.623  |
| 6.00E+15 | 0.3  | 0.2  | 4.00E+17 | 0.456 | 80.691  |
| 6.00E+15 | 0.3  | 0.2  | 5.00E+17 | 0.474 | 97.746  |
| 6.00E+15 | 0.3  | 0.2  | 6.00E+17 | 0.482 | 116.780 |
| 6.00E+15 | 0.3  | 0.2  | 7.00E+17 | 0.490 | 138.308 |
| 6.00E+15 | 0.3  | 0.2  | 8.00E+17 | 0.489 | 162.143 |
| 6.00E+15 | 0.3  | 0.2  | 9.00E+17 | 0.498 | 191.054 |
| 6.00E+15 | 0.3  | 0.2  | 1.00E+18 | 0.503 | 217.126 |
| 6.00E+15 | 0.3  | 0.25 | 3.00E+17 | 0.472 | 75.895  |
| 6.00E+15 | 0.3  | 0.25 | 4.00E+17 | 0.501 | 96.687  |
| 6.00E+15 | 0.3  | 0.25 | 5.00E+17 | 0.518 | 122.207 |
| 6.00E+15 | 0.3  | 0.25 | 6.00E+17 | 0.527 | 148.171 |
| 6.00E+15 | 0.3  | 0.25 | 7.00E+17 | 0.530 | 182.170 |
| 6.00E+15 | 0.3  | 0.25 | 8.00E+17 | 0.541 | 214.434 |
| 6.00E+15 | 0.3  | 0.25 | 9.00E+17 | 0.549 | 252.944 |
| 6.00E+15 | 0.3  | 0.25 | 1.00E+18 | 0.557 | 299.065 |
| 6.00E+15 | 0.3  | 0.3  | 3.00E+17 | 0.511 | 87.135  |
| 6.00E+15 | 0.3  | 0.3  | 4.00E+17 | 0.548 | 113.870 |
| 6.00E+15 | 0.3  | 0.3  | 5.00E+17 | 0.565 | 146.122 |
| 6.00E+15 | 0.3  | 0.3  | 6.00E+17 | 0.577 | 186.224 |
| 6.00E+15 | 0.3  | 0.3  | 7.00E+17 | 0.586 | 225.876 |
| 6.00E+15 | 0.3  | 0.3  | 8.00E+17 | 0.594 | 277.333 |
| 6.00E+15 | 0.3  | 0.3  | 9.00E+17 | 0.603 | 326.267 |
| 6.00E+15 | 0.3  | 0.3  | 1.00E+18 | 0.606 | 388.024 |

|          |      |      |          |       |         |
|----------|------|------|----------|-------|---------|
| 6.00E+15 | 0.3  | 0.35 | 3.00E+17 | 0.548 | 98.440  |
| 6.00E+15 | 0.3  | 0.35 | 4.00E+17 | 0.595 | 134.722 |
| 6.00E+15 | 0.3  | 0.35 | 5.00E+17 | 0.614 | 176.791 |
| 6.00E+15 | 0.3  | 0.35 | 6.00E+17 | 0.627 | 222.422 |
| 6.00E+15 | 0.3  | 0.35 | 7.00E+17 | 0.637 | 281.652 |
| 6.00E+15 | 0.3  | 0.35 | 8.00E+17 | 0.648 | 339.626 |
| 6.00E+15 | 0.3  | 0.35 | 9.00E+17 | 0.655 | 410.711 |
| 6.00E+15 | 0.3  | 0.35 | 1.00E+18 | 0.663 | 472.809 |
| 6.00E+15 | 0.3  | 0.4  | 3.00E+17 | 0.597 | 110.534 |
| 6.00E+15 | 0.3  | 0.4  | 4.00E+17 | 0.645 | 155.302 |
| 6.00E+15 | 0.3  | 0.4  | 5.00E+17 | 0.662 | 207.686 |
| 6.00E+15 | 0.3  | 0.4  | 6.00E+17 | 0.673 | 268.804 |
| 6.00E+15 | 0.3  | 0.4  | 7.00E+17 | 0.695 | 338.835 |
| 6.00E+15 | 0.3  | 0.4  | 8.00E+17 | 0.705 | 409.297 |
| 6.00E+15 | 0.3  | 0.4  | 9.00E+17 | 0.718 | 490.287 |
| 6.00E+15 | 0.3  | 0.4  | 1.00E+18 | 0.730 | 565.088 |
| 6.00E+15 | 0.35 | 0.15 | 3.00E+17 | 0.409 | 56.623  |
| 6.00E+15 | 0.35 | 0.15 | 4.00E+17 | 0.431 | 68.960  |
| 6.00E+15 | 0.35 | 0.15 | 5.00E+17 | 0.449 | 81.897  |
| 6.00E+15 | 0.35 | 0.15 | 6.00E+17 | 0.471 | 95.508  |
| 6.00E+15 | 0.35 | 0.15 | 7.00E+17 | 0.478 | 110.418 |
| 6.00E+15 | 0.35 | 0.15 | 8.00E+17 | 0.483 | 126.708 |
| 6.00E+15 | 0.35 | 0.15 | 9.00E+17 | 0.491 | 144.873 |
| 6.00E+15 | 0.35 | 0.15 | 1.00E+18 | 0.496 | 164.295 |
| 6.00E+15 | 0.35 | 0.2  | 3.00E+17 | 0.459 | 69.721  |
| 6.00E+15 | 0.35 | 0.2  | 4.00E+17 | 0.496 | 87.631  |
| 6.00E+15 | 0.35 | 0.2  | 5.00E+17 | 0.507 | 107.279 |
| 6.00E+15 | 0.35 | 0.2  | 6.00E+17 | 0.524 | 129.680 |
| 6.00E+15 | 0.35 | 0.2  | 7.00E+17 | 0.506 | 155.219 |
| 6.00E+15 | 0.35 | 0.2  | 8.00E+17 | 0.536 | 183.706 |
| 6.00E+15 | 0.35 | 0.2  | 9.00E+17 | 0.547 | 214.889 |
| 6.00E+15 | 0.35 | 0.2  | 1.00E+18 | 0.556 | 248.969 |
| 6.00E+15 | 0.35 | 0.25 | 3.00E+17 | 0.504 | 82.467  |
| 6.00E+15 | 0.35 | 0.25 | 4.00E+17 | 0.549 | 106.428 |
| 6.00E+15 | 0.35 | 0.25 | 5.00E+17 | 0.569 | 134.792 |
| 6.00E+15 | 0.35 | 0.25 | 6.00E+17 | 0.578 | 167.733 |
| 6.00E+15 | 0.35 | 0.25 | 7.00E+17 | 0.593 | 204.748 |
| 6.00E+15 | 0.35 | 0.25 | 8.00E+17 | 0.603 | 246.964 |
| 6.00E+15 | 0.35 | 0.25 | 9.00E+17 | 0.609 | 292.998 |
| 6.00E+15 | 0.35 | 0.25 | 1.00E+18 | 0.619 | 343.343 |
| 6.00E+15 | 0.35 | 0.3  | 3.00E+17 | 0.558 | 95.316  |
| 6.00E+15 | 0.35 | 0.3  | 4.00E+17 | 0.605 | 127.193 |
| 6.00E+15 | 0.35 | 0.3  | 5.00E+17 | 0.623 | 165.678 |
| 6.00E+15 | 0.35 | 0.3  | 6.00E+17 | 0.634 | 210.651 |
| 6.00E+15 | 0.35 | 0.3  | 7.00E+17 | 0.648 | 261.668 |
| 6.00E+15 | 0.35 | 0.3  | 8.00E+17 | 0.663 | 318.888 |
| 6.00E+15 | 0.35 | 0.3  | 9.00E+17 | 0.672 | 381.523 |
| 6.00E+15 | 0.35 | 0.3  | 1.00E+18 | 0.682 | 445.603 |
| 6.00E+15 | 0.35 | 0.35 | 3.00E+17 | 0.616 | 109.037 |
| 6.00E+15 | 0.35 | 0.35 | 4.00E+17 | 0.664 | 150.135 |
| 6.00E+15 | 0.35 | 0.35 | 5.00E+17 | 0.688 | 199.977 |
| 6.00E+15 | 0.35 | 0.35 | 6.00E+17 | 0.708 | 258.153 |
| 6.00E+15 | 0.35 | 0.35 | 7.00E+17 | 0.721 | 324.742 |
| 6.00E+15 | 0.35 | 0.35 | 8.00E+17 | 0.734 | 397.729 |
| 6.00E+15 | 0.35 | 0.35 | 9.00E+17 | 0.743 | 471.684 |
| 6.00E+15 | 0.35 | 0.35 | 1.00E+18 | 0.753 | 545.156 |
| 6.00E+15 | 0.35 | 0.4  | 3.00E+17 | 0.676 | 123.943 |
| 6.00E+15 | 0.35 | 0.4  | 4.00E+17 | 0.733 | 175.211 |

|          |      |      |          |       |         |
|----------|------|------|----------|-------|---------|
| 6.00E+15 | 0.35 | 0.4  | 5.00E+17 | 0.762 | 237.465 |
| 6.00E+15 | 0.35 | 0.4  | 6.00E+17 | 0.777 | 310.390 |
| 6.00E+15 | 0.35 | 0.4  | 7.00E+17 | 0.795 | 392.467 |
| 6.00E+15 | 0.35 | 0.4  | 8.00E+17 | 0.804 | 476.143 |
| 6.00E+15 | 0.35 | 0.4  | 9.00E+17 | 0.818 | 559.789 |
| 6.00E+15 | 0.35 | 0.4  | 1.00E+18 | 0.833 | 642.911 |
| 6.00E+15 | 0.4  | 0.15 | 3.00E+17 | 0.424 | 58.892  |
| 6.00E+15 | 0.4  | 0.15 | 4.00E+17 | 0.452 | 72.264  |
| 6.00E+15 | 0.4  | 0.15 | 5.00E+17 | 0.480 | 86.386  |
| 6.00E+15 | 0.4  | 0.15 | 6.00E+17 | 0.502 | 101.488 |
| 6.00E+15 | 0.4  | 0.15 | 7.00E+17 | 0.515 | 118.256 |
| 6.00E+15 | 0.4  | 0.15 | 8.00E+17 | 0.525 | 137.093 |
| 6.00E+15 | 0.4  | 0.15 | 9.00E+17 | 0.536 | 157.606 |
| 6.00E+15 | 0.4  | 0.15 | 1.00E+18 | 0.545 | 180.077 |
| 6.00E+15 | 0.4  | 0.2  | 3.00E+17 | 0.485 | 73.110  |
| 6.00E+15 | 0.4  | 0.2  | 4.00E+17 | 0.537 | 92.592  |
| 6.00E+15 | 0.4  | 0.2  | 5.00E+17 | 0.562 | 114.732 |
| 6.00E+15 | 0.4  | 0.2  | 6.00E+17 | 0.570 | 140.448 |
| 6.00E+15 | 0.4  | 0.2  | 7.00E+17 | 0.581 | 169.507 |
| 6.00E+15 | 0.4  | 0.2  | 8.00E+17 | 0.595 | 201.868 |
| 6.00E+15 | 0.4  | 0.2  | 9.00E+17 | 0.607 | 237.546 |
| 6.00E+15 | 0.4  | 0.2  | 1.00E+18 | 0.615 | 276.435 |
| 6.00E+15 | 0.4  | 0.25 | 3.00E+17 | 0.548 | 87.128  |
| 6.00E+15 | 0.4  | 0.25 | 4.00E+17 | 0.610 | 114.085 |
| 6.00E+15 | 0.4  | 0.25 | 5.00E+17 | 0.630 | 146.634 |
| 6.00E+15 | 0.4  | 0.25 | 6.00E+17 | 0.638 | 184.292 |
| 6.00E+15 | 0.4  | 0.25 | 7.00E+17 | 0.655 | 227.140 |
| 6.00E+15 | 0.4  | 0.25 | 8.00E+17 | 0.671 | 275.102 |
| 6.00E+15 | 0.4  | 0.25 | 9.00E+17 | 0.682 | 328.057 |
| 6.00E+15 | 0.4  | 0.25 | 1.00E+18 | 0.691 | 385.220 |
| 6.00E+15 | 0.4  | 0.3  | 3.00E+17 | 0.625 | 101.875 |
| 6.00E+15 | 0.4  | 0.3  | 4.00E+17 | 0.679 | 138.534 |
| 6.00E+15 | 0.4  | 0.3  | 5.00E+17 | 0.698 | 182.587 |
| 6.00E+15 | 0.4  | 0.3  | 6.00E+17 | 0.717 | 234.263 |
| 6.00E+15 | 0.4  | 0.3  | 7.00E+17 | 0.739 | 293.201 |
| 6.00E+15 | 0.4  | 0.3  | 8.00E+17 | 0.752 | 358.953 |
| 6.00E+15 | 0.4  | 0.3  | 9.00E+17 | 0.762 | 428.146 |
| 6.00E+15 | 0.4  | 0.3  | 1.00E+18 | 0.772 | 362.139 |
| 6.00E+15 | 0.4  | 0.35 | 3.00E+17 | 0.693 | 117.686 |
| 6.00E+15 | 0.4  | 0.35 | 4.00E+17 | 0.751 | 165.274 |
| 6.00E+15 | 0.4  | 0.35 | 5.00E+17 | 0.779 | 222.658 |
| 6.00E+15 | 0.4  | 0.35 | 6.00E+17 | 0.799 | 290.074 |
| 6.00E+15 | 0.4  | 0.35 | 7.00E+17 | 0.819 | 366.541 |
| 6.00E+15 | 0.4  | 0.35 | 8.00E+17 | 0.833 | 446.686 |
| 6.00E+15 | 0.4  | 0.35 | 9.00E+17 | 0.845 | 526.689 |
| 6.00E+15 | 0.4  | 0.35 | 1.00E+18 | 0.858 | 606.547 |
| 6.00E+15 | 0.4  | 0.4  | 3.00E+17 | 0.778 | 135.480 |
| 6.00E+15 | 0.4  | 0.4  | 4.00E+17 | 0.832 | 194.619 |
| 6.00E+15 | 0.4  | 0.4  | 5.00E+17 | 0.855 | 266.828 |
| 6.00E+15 | 0.4  | 0.4  | 6.00E+17 | 0.886 | 351.471 |
| 6.00E+15 | 0.4  | 0.4  | 7.00E+17 | 0.911 | 442.125 |
| 6.00E+15 | 0.4  | 0.4  | 8.00E+17 | 0.926 | 532.910 |
| 6.00E+15 | 0.4  | 0.4  | 9.00E+17 | 0.941 | 623.437 |
| 6.00E+15 | 0.4  | 0.4  | 1.00E+18 | 0.951 | 713.368 |
| 6.00E+15 | 0.45 | 0.15 | 3.00E+17 | 0.444 | 61.233  |
| 6.00E+15 | 0.45 | 0.15 | 4.00E+17 | 0.474 | 75.568  |
| 6.00E+15 | 0.45 | 0.15 | 5.00E+17 | 0.515 | 90.851  |
| 6.00E+15 | 0.45 | 0.15 | 6.00E+17 | 0.544 | 107.779 |

|          |      |      |          |       |         |
|----------|------|------|----------|-------|---------|
| 6.00E+15 | 0.45 | 0.15 | 7.00E+17 | 0.562 | 126.750 |
| 6.00E+15 | 0.45 | 0.15 | 8.00E+17 | 0.572 | 147.991 |
| 6.00E+15 | 0.45 | 0.15 | 9.00E+17 | 0.587 | 171.275 |
| 6.00E+15 | 0.45 | 0.15 | 1.00E+18 | 0.599 | 196.462 |
| 6.00E+15 | 0.45 | 0.2  | 3.00E+17 | 0.519 | 76.533  |
| 6.00E+15 | 0.45 | 0.2  | 4.00E+17 | 0.582 | 98.030  |
| 6.00E+15 | 0.45 | 0.2  | 5.00E+17 | 0.612 | 122.929 |
| 6.00E+15 | 0.45 | 0.2  | 6.00E+17 | 0.633 | 152.000 |
| 6.00E+15 | 0.45 | 0.2  | 7.00E+17 | 0.632 | 184.911 |
| 6.00E+15 | 0.45 | 0.2  | 8.00E+17 | 0.659 | 221.622 |
| 6.00E+15 | 0.45 | 0.2  | 9.00E+17 | 0.671 | 262.074 |
| 6.00E+15 | 0.45 | 0.2  | 1.00E+18 | 0.675 | 306.377 |
| 6.00E+15 | 0.45 | 0.25 | 3.00E+17 | 0.601 | 91.895  |
| 6.00E+15 | 0.45 | 0.25 | 4.00E+17 | 0.673 | 122.377 |
| 6.00E+15 | 0.45 | 0.25 | 5.00E+17 | 0.702 | 159.156 |
| 6.00E+15 | 0.45 | 0.25 | 6.00E+17 | 0.721 | 202.056 |
| 6.00E+15 | 0.45 | 0.25 | 7.00E+17 | 0.736 | 250.762 |
| 6.00E+15 | 0.45 | 0.25 | 8.00E+17 | 0.719 | 305.302 |
| 6.00E+15 | 0.45 | 0.25 | 9.00E+17 | 0.767 | 365.119 |
| 6.00E+15 | 0.45 | 0.25 | 1.00E+18 | 0.777 | 426.768 |
| 6.00E+15 | 0.45 | 0.3  | 3.00E+17 | 0.698 | 108.672 |
| 6.00E+15 | 0.45 | 0.3  | 4.00E+17 | 0.745 | 150.218 |
| 6.00E+15 | 0.45 | 0.3  | 5.00E+17 | 0.780 | 200.549 |
| 6.00E+15 | 0.45 | 0.3  | 6.00E+17 | 0.799 | 259.190 |
| 6.00E+15 | 0.45 | 0.3  | 7.00E+17 | 0.834 | 326.490 |
| 6.00E+15 | 0.45 | 0.3  | 8.00E+17 | 0.855 | 399.820 |
| 6.00E+15 | 0.45 | 0.3  | 9.00E+17 | 0.865 | 474.147 |
| 6.00E+15 | 0.45 | 0.3  | 1.00E+18 | 0.873 | 548.417 |
| 6.00E+15 | 0.45 | 0.35 | 3.00E+17 | 0.785 | 127.080 |
| 6.00E+15 | 0.45 | 0.35 | 4.00E+17 | 0.852 | 180.980 |
| 6.00E+15 | 0.45 | 0.35 | 5.00E+17 | 0.891 | 246.549 |
| 6.00E+15 | 0.45 | 0.35 | 6.00E+17 | 0.917 | 323.513 |
| 6.00E+15 | 0.45 | 0.35 | 7.00E+17 | 0.938 | 408.437 |
| 6.00E+15 | 0.45 | 0.35 | 8.00E+17 | 0.958 | 494.458 |
| 6.00E+15 | 0.45 | 0.35 | 9.00E+17 | 0.978 | 580.317 |
| 6.00E+15 | 0.45 | 0.35 | 1.00E+18 | 0.997 | 666.012 |
| 6.00E+15 | 0.45 | 0.4  | 3.00E+17 | 0.878 | 147.340 |
| 6.00E+15 | 0.45 | 0.4  | 4.00E+17 | 0.950 | 214.846 |
| 6.00E+15 | 0.45 | 0.4  | 5.00E+17 | 1.009 | 297.390 |
| 6.00E+15 | 0.45 | 0.4  | 6.00E+17 | 1.029 | 392.722 |
| 6.00E+15 | 0.45 | 0.4  | 7.00E+17 | 1.067 | 490.154 |
| 6.00E+15 | 0.45 | 0.4  | 8.00E+17 | 1.083 | 541.134 |
| 6.00E+15 | 0.45 | 0.4  | 9.00E+17 | 1.114 | 684.980 |
| 6.00E+15 | 0.45 | 0.4  | 1.00E+18 | 1.134 | 779.922 |
| 6.00E+15 | 0.5  | 0.15 | 3.00E+17 | 0.464 | 117.137 |
| 6.00E+15 | 0.5  | 0.15 | 4.00E+17 | 0.500 | 141.074 |
| 6.00E+15 | 0.5  | 0.15 | 5.00E+17 | 0.553 | 167.878 |
| 6.00E+15 | 0.5  | 0.15 | 6.00E+17 | 0.590 | 160.249 |
| 6.00E+15 | 0.5  | 0.15 | 7.00E+17 | 0.615 | 171.104 |
| 6.00E+15 | 0.5  | 0.15 | 8.00E+17 | 0.631 | 182.882 |
| 6.00E+15 | 0.5  | 0.15 | 9.00E+17 | 0.648 | 194.331 |
| 6.00E+15 | 0.5  | 0.15 | 1.00E+18 | 0.662 | 206.237 |
| 6.00E+15 | 0.5  | 0.2  | 3.00E+17 | 0.556 | 144.192 |
| 6.00E+15 | 0.5  | 0.2  | 4.00E+17 | 0.634 | 182.176 |
| 6.00E+15 | 0.5  | 0.2  | 5.00E+17 | 0.675 | 227.145 |
| 6.00E+15 | 0.5  | 0.2  | 6.00E+17 | 0.690 | 275.692 |
| 6.00E+15 | 0.5  | 0.2  | 7.00E+17 | 0.716 | 329.948 |
| 6.00E+15 | 0.5  | 0.2  | 8.00E+17 | 0.739 | 388.514 |

|          |     |      |          |       |          |
|----------|-----|------|----------|-------|----------|
| 6.00E+15 | 0.5 | 0.2  | 9.00E+17 | 0.745 | 446.219  |
| 6.00E+15 | 0.5 | 0.2  | 1.00E+18 | 0.772 | 508.090  |
| 6.00E+15 | 0.5 | 0.25 | 3.00E+17 | 0.659 | 175.300  |
| 6.00E+15 | 0.5 | 0.25 | 4.00E+17 | 0.742 | 229.428  |
| 6.00E+15 | 0.5 | 0.25 | 5.00E+17 | 0.781 | 291.796  |
| 6.00E+15 | 0.5 | 0.25 | 6.00E+17 | 0.808 | 363.243  |
| 6.00E+15 | 0.5 | 0.25 | 7.00E+17 | 0.834 | 438.355  |
| 6.00E+15 | 0.5 | 0.25 | 8.00E+17 | 0.855 | 513.573  |
| 6.00E+15 | 0.5 | 0.25 | 9.00E+17 | 0.870 | 588.990  |
| 6.00E+15 | 0.5 | 0.25 | 1.00E+18 | 0.885 | 663.688  |
| 6.00E+15 | 0.5 | 0.3  | 3.00E+17 | 0.787 | 191.800  |
| 6.00E+15 | 0.5 | 0.3  | 4.00E+17 | 0.852 | 279.789  |
| 6.00E+15 | 0.5 | 0.3  | 5.00E+17 | 0.901 | 364.578  |
| 6.00E+15 | 0.5 | 0.3  | 6.00E+17 | 0.922 | 302.898  |
| 6.00E+15 | 0.5 | 0.3  | 7.00E+17 | 0.941 | 544.722  |
| 6.00E+15 | 0.5 | 0.3  | 8.00E+17 | 0.989 | 634.910  |
| 6.00E+15 | 0.5 | 0.3  | 9.00E+17 | 0.998 | 724.334  |
| 6.00E+15 | 0.5 | 0.3  | 1.00E+18 | 1.010 | 812.086  |
| 6.00E+15 | 0.5 | 0.35 | 3.00E+17 | 0.892 | 241.333  |
| 6.00E+15 | 0.5 | 0.35 | 4.00E+17 | 0.967 | 315.956  |
| 6.00E+15 | 0.5 | 0.35 | 5.00E+17 | 1.008 | 438.102  |
| 6.00E+15 | 0.5 | 0.35 | 6.00E+17 | 1.070 | 543.051  |
| 6.00E+15 | 0.5 | 0.35 | 7.00E+17 | 1.099 | 647.890  |
| 6.00E+15 | 0.5 | 0.35 | 8.00E+17 | 1.121 | 751.542  |
| 6.00E+15 | 0.5 | 0.35 | 9.00E+17 | 1.149 | 853.653  |
| 6.00E+15 | 0.5 | 0.35 | 1.00E+18 | 1.169 | 952.092  |
| 6.00E+15 | 0.5 | 0.4  | 3.00E+17 | 1.003 | 278.119  |
| 6.00E+15 | 0.5 | 0.4  | 4.00E+17 | 1.104 | 391.782  |
| 6.00E+15 | 0.5 | 0.4  | 5.00E+17 | 1.173 | 445.845  |
| 6.00E+15 | 0.5 | 0.4  | 6.00E+17 | 1.222 | 627.720  |
| 6.00E+15 | 0.5 | 0.4  | 7.00E+17 | 1.259 | 747.886  |
| 6.00E+15 | 0.5 | 0.4  | 8.00E+17 | 1.295 | 864.355  |
| 6.00E+15 | 0.5 | 0.4  | 9.00E+17 | 1.334 | 977.030  |
| 6.00E+15 | 0.5 | 0.4  | 1.00E+18 | 1.362 | 1083.470 |
| 6.00E+15 | 0.6 | 0.15 | 3.00E+17 | 0.505 | 122.680  |
| 6.00E+15 | 0.6 | 0.15 | 4.00E+17 | 0.551 | 148.468  |
| 6.00E+15 | 0.6 | 0.15 | 5.00E+17 | 0.632 | 179.990  |
| 6.00E+15 | 0.6 | 0.15 | 6.00E+17 | 0.694 | 211.731  |
| 6.00E+15 | 0.6 | 0.15 | 7.00E+17 | 0.745 | 250.478  |
| 6.00E+15 | 0.6 | 0.15 | 8.00E+17 | 0.780 | 291.152  |
| 6.00E+15 | 0.6 | 0.15 | 9.00E+17 | 0.799 | 334.481  |
| 6.00E+15 | 0.6 | 0.15 | 1.00E+18 | 0.819 | 380.767  |
| 6.00E+15 | 0.6 | 0.2  | 3.00E+17 | 0.640 | 152.031  |
| 6.00E+15 | 0.6 | 0.2  | 4.00E+17 | 0.758 | 194.619  |
| 6.00E+15 | 0.6 | 0.2  | 5.00E+17 | 0.838 | 243.637  |
| 6.00E+15 | 0.6 | 0.2  | 6.00E+17 | 0.878 | 301.005  |
| 6.00E+15 | 0.6 | 0.2  | 7.00E+17 | 0.911 | 362.417  |
| 6.00E+15 | 0.6 | 0.2  | 8.00E+17 | 0.943 | 426.864  |
| 6.00E+15 | 0.6 | 0.2  | 9.00E+17 | 0.961 | 489.136  |
| 6.00E+15 | 0.6 | 0.2  | 1.00E+18 | 0.987 | 556.004  |
| 6.00E+15 | 0.6 | 0.25 | 3.00E+17 | 0.824 | 185.774  |
| 6.00E+15 | 0.6 | 0.25 | 4.00E+17 | 0.951 | 249.081  |
| 6.00E+15 | 0.6 | 0.25 | 5.00E+17 | 1.018 | 320.780  |
| 6.00E+15 | 0.6 | 0.25 | 6.00E+17 | 1.062 | 401.326  |
| 6.00E+15 | 0.6 | 0.25 | 7.00E+17 | 1.096 | 480.139  |
| 6.00E+15 | 0.6 | 0.25 | 8.00E+17 | 1.142 | 561.680  |
| 6.00E+15 | 0.6 | 0.25 | 9.00E+17 | 1.167 | 645.344  |
| 6.00E+15 | 0.6 | 0.25 | 1.00E+18 | 1.195 | 726.064  |



|          |     |      |          |       |          |
|----------|-----|------|----------|-------|----------|
| 6.00E+15 | 0.6 | 0.3  | 3.00E+17 | 1.011 | 224.929  |
| 6.00E+15 | 0.6 | 0.3  | 4.00E+17 | 1.134 | 242.011  |
| 6.00E+15 | 0.6 | 0.3  | 5.00E+17 | 1.226 | 403.685  |
| 6.00E+15 | 0.6 | 0.3  | 6.00E+17 | 1.265 | 499.288  |
| 6.00E+15 | 0.6 | 0.3  | 7.00E+17 | 1.321 | 599.551  |
| 6.00E+15 | 0.6 | 0.3  | 1.00E+18 | 1.425 | 888.884  |
| 6.00E+15 | 0.6 | 0.35 | 3.00E+17 | 1.201 | 262.676  |
| 6.00E+15 | 0.6 | 0.35 | 4.00E+17 | 1.336 | 371.326  |
| 6.00E+15 | 0.6 | 0.35 | 5.00E+17 | 1.487 | 454.103  |
| 6.00E+15 | 0.6 | 0.35 | 6.00E+17 | 1.517 | 599.685  |
| 6.00E+15 | 0.6 | 0.35 | 7.00E+17 | 1.587 | 713.622  |
| 6.00E+15 | 0.6 | 0.35 | 8.00E+17 | 1.626 | 826.565  |
| 6.00E+15 | 0.6 | 0.35 | 9.00E+17 | 1.674 | 936.237  |
| 6.00E+15 | 0.6 | 0.4  | 3.00E+17 | 1.409 | 308.111  |
| 6.00E+15 | 0.6 | 0.4  | 4.00E+17 | 1.579 | 433.923  |
| 6.00E+15 | 0.6 | 0.4  | 5.00E+17 | 1.821 | 566.042  |
| 6.00E+15 | 0.6 | 0.4  | 6.00E+17 | 1.824 | 696.195  |
| 6.00E+15 | 0.6 | 0.4  | 7.00E+17 | 1.882 | 824.928  |
| 6.00E+15 | 0.6 | 0.4  | 8.00E+17 | 1.952 | 950.723  |
| 6.00E+15 | 0.6 | 0.4  | 9.00E+17 | 2.026 | 1071.600 |
| 6.00E+15 | 0.6 | 0.4  | 1.00E+18 | 2.082 | 1185.040 |
| 8.00E+15 | 0.2 | 0.15 | 3.00E+17 | 0.282 | 52.709   |
| 8.00E+15 | 0.2 | 0.15 | 4.00E+17 | 0.287 | 61.555   |
| 8.00E+15 | 0.2 | 0.15 | 5.00E+17 | 0.295 | 70.725   |
| 8.00E+15 | 0.2 | 0.15 | 6.00E+17 | 0.298 | 80.331   |
| 8.00E+15 | 0.2 | 0.15 | 7.00E+17 | 0.302 | 90.261   |
| 8.00E+15 | 0.2 | 0.15 | 8.00E+17 | 0.305 | 100.544  |
| 8.00E+15 | 0.2 | 0.15 | 9.00E+17 | 0.306 | 111.041  |
| 8.00E+15 | 0.2 | 0.15 | 1.00E+18 | 0.307 | 122.041  |
| 8.00E+15 | 0.2 | 0.2  | 3.00E+17 | 0.299 | 61.564   |
| 8.00E+15 | 0.2 | 0.2  | 4.00E+17 | 0.305 | 73.965   |
| 8.00E+15 | 0.2 | 0.2  | 5.00E+17 | 0.312 | 87.038   |
| 8.00E+15 | 0.2 | 0.2  | 6.00E+17 | 0.316 | 100.773  |
| 8.00E+15 | 0.2 | 0.2  | 7.00E+17 | 0.318 | 114.962  |
| 8.00E+15 | 0.2 | 0.2  | 8.00E+17 | 0.320 | 129.878  |
| 8.00E+15 | 0.2 | 0.2  | 9.00E+17 | 0.323 | 132.685  |
| 8.00E+15 | 0.2 | 0.2  | 1.00E+18 | 0.325 | 141.116  |
| 8.00E+15 | 0.2 | 0.25 | 3.00E+17 | 0.313 | 70.317   |
| 8.00E+15 | 0.2 | 0.25 | 4.00E+17 | 0.321 | 86.345   |
| 8.00E+15 | 0.2 | 0.25 | 5.00E+17 | 0.328 | 103.373  |
| 8.00E+15 | 0.2 | 0.25 | 6.00E+17 | 0.332 | 121.302  |
| 8.00E+15 | 0.2 | 0.25 | 7.00E+17 | 0.333 | 139.837  |
| 8.00E+15 | 0.2 | 0.25 | 8.00E+17 | 0.336 | 159.107  |
| 8.00E+15 | 0.2 | 0.25 | 9.00E+17 | 0.338 | 182.518  |
| 8.00E+15 | 0.2 | 0.25 | 1.00E+18 | 0.339 | 205.587  |
| 8.00E+15 | 0.2 | 0.3  | 3.00E+17 | 0.329 | 78.891   |
| 8.00E+15 | 0.2 | 0.3  | 4.00E+17 | 0.336 | 98.639   |
| 8.00E+15 | 0.2 | 0.3  | 5.00E+17 | 0.342 | 119.460  |
| 8.00E+15 | 0.2 | 0.3  | 6.00E+17 | 0.345 | 141.622  |
| 8.00E+15 | 0.2 | 0.3  | 7.00E+17 | 0.349 | 166.334  |
| 8.00E+15 | 0.2 | 0.3  | 8.00E+17 | 0.351 | 192.580  |
| 8.00E+15 | 0.2 | 0.3  | 9.00E+17 | 0.354 | 224.150  |
| 8.00E+15 | 0.2 | 0.3  | 1.00E+18 | 0.356 | 257.069  |
| 8.00E+15 | 0.2 | 0.35 | 3.00E+17 | 0.341 | 87.325   |
| 8.00E+15 | 0.2 | 0.35 | 4.00E+17 | 0.349 | 110.543  |
| 8.00E+15 | 0.2 | 0.35 | 5.00E+17 | 0.356 | 135.352  |
| 8.00E+15 | 0.2 | 0.35 | 6.00E+17 | 0.360 | 163.241  |
| 8.00E+15 | 0.2 | 0.35 | 7.00E+17 | 0.364 | 193.605  |

|          |      |      |          |       |         |
|----------|------|------|----------|-------|---------|
| 8.00E+15 | 0.2  | 0.35 | 8.00E+17 | 0.367 | 228.770 |
| 8.00E+15 | 0.2  | 0.35 | 9.00E+17 | 0.371 | 201.932 |
| 8.00E+15 | 0.2  | 0.35 | 1.00E+18 | 0.373 | 311.472 |
| 8.00E+15 | 0.2  | 0.4  | 3.00E+17 | 0.356 | 95.631  |
| 8.00E+15 | 0.2  | 0.4  | 4.00E+17 | 0.364 | 122.422 |
| 8.00E+15 | 0.2  | 0.4  | 5.00E+17 | 0.373 | 152.325 |
| 8.00E+15 | 0.2  | 0.4  | 6.00E+17 | 0.378 | 185.360 |
| 8.00E+15 | 0.2  | 0.4  | 7.00E+17 | 0.386 | 225.803 |
| 8.00E+15 | 0.2  | 0.4  | 8.00E+17 | 0.388 | 269.615 |
| 8.00E+15 | 0.2  | 0.4  | 9.00E+17 | 0.393 | 317.970 |
| 8.00E+15 | 0.2  | 0.4  | 1.00E+18 | 0.394 | 368.828 |
| 8.00E+15 | 0.25 | 0.15 | 3.00E+17 | 0.289 | 44.933  |
| 8.00E+15 | 0.25 | 0.15 | 4.00E+17 | 0.298 | 53.712  |
| 8.00E+15 | 0.25 | 0.15 | 5.00E+17 | 0.306 | 62.944  |
| 8.00E+15 | 0.25 | 0.15 | 6.00E+17 | 0.312 | 72.515  |
| 8.00E+15 | 0.25 | 0.15 | 7.00E+17 | 0.316 | 82.538  |
| 8.00E+15 | 0.25 | 0.15 | 8.00E+17 | 0.318 | 92.951  |
| 8.00E+15 | 0.25 | 0.15 | 9.00E+17 | 0.323 | 103.657 |
| 8.00E+15 | 0.25 | 0.15 | 1.00E+18 | 0.323 | 114.703 |
| 8.00E+15 | 0.25 | 0.2  | 3.00E+17 | 0.310 | 54.199  |
| 8.00E+15 | 0.25 | 0.2  | 4.00E+17 | 0.321 | 66.918  |
| 8.00E+15 | 0.25 | 0.2  | 5.00E+17 | 0.328 | 80.417  |
| 8.00E+15 | 0.25 | 0.2  | 6.00E+17 | 0.332 | 94.659  |
| 8.00E+15 | 0.25 | 0.2  | 7.00E+17 | 0.334 | 109.460 |
| 8.00E+15 | 0.25 | 0.2  | 8.00E+17 | 0.337 | 124.840 |
| 8.00E+15 | 0.25 | 0.2  | 9.00E+17 | 0.339 | 141.180 |
| 8.00E+15 | 0.25 | 0.2  | 1.00E+18 | 0.343 | 158.860 |
| 8.00E+15 | 0.25 | 0.25 | 3.00E+17 | 0.331 | 63.019  |
| 8.00E+15 | 0.25 | 0.25 | 4.00E+17 | 0.338 | 79.391  |
| 8.00E+15 | 0.25 | 0.25 | 5.00E+17 | 0.347 | 96.958  |
| 8.00E+15 | 0.25 | 0.25 | 6.00E+17 | 0.353 | 115.433 |
| 8.00E+15 | 0.25 | 0.25 | 7.00E+17 | 0.358 | 134.972 |
| 8.00E+15 | 0.25 | 0.25 | 8.00E+17 | 0.359 | 156.443 |
| 8.00E+15 | 0.25 | 0.25 | 9.00E+17 | 0.361 | 180.406 |
| 8.00E+15 | 0.25 | 0.25 | 1.00E+18 | 0.365 | 206.475 |
| 8.00E+15 | 0.25 | 0.3  | 3.00E+17 | 0.348 | 71.636  |
| 8.00E+15 | 0.25 | 0.3  | 4.00E+17 | 0.358 | 91.872  |
| 8.00E+15 | 0.25 | 0.3  | 5.00E+17 | 0.366 | 113.437 |
| 8.00E+15 | 0.25 | 0.3  | 6.00E+17 | 0.373 | 136.569 |
| 8.00E+15 | 0.25 | 0.3  | 7.00E+17 | 0.374 | 162.605 |
| 8.00E+15 | 0.25 | 0.3  | 8.00E+17 | 0.384 | 192.172 |
| 8.00E+15 | 0.25 | 0.3  | 9.00E+17 | 0.383 | 224.597 |
| 8.00E+15 | 0.25 | 0.3  | 1.00E+18 | 0.386 | 260.172 |
| 8.00E+15 | 0.25 | 0.35 | 3.00E+17 | 0.362 | 80.191  |
| 8.00E+15 | 0.25 | 0.35 | 4.00E+17 | 0.381 | 104.125 |
| 8.00E+15 | 0.25 | 0.35 | 5.00E+17 | 0.387 | 129.991 |
| 8.00E+15 | 0.25 | 0.35 | 6.00E+17 | 0.396 | 159.375 |
| 8.00E+15 | 0.25 | 0.35 | 7.00E+17 | 0.402 | 193.426 |
| 8.00E+15 | 0.25 | 0.35 | 8.00E+17 | 0.408 | 231.512 |
| 8.00E+15 | 0.25 | 0.35 | 9.00E+17 | 0.409 | 273.548 |
| 8.00E+15 | 0.25 | 0.35 | 1.00E+18 | 0.414 | 319.766 |
| 8.00E+15 | 0.25 | 0.4  | 3.00E+17 | 0.383 | 88.784  |
| 8.00E+15 | 0.25 | 0.4  | 4.00E+17 | 0.401 | 116.520 |
| 8.00E+15 | 0.25 | 0.4  | 5.00E+17 | 0.415 | 147.796 |
| 8.00E+15 | 0.25 | 0.4  | 6.00E+17 | 0.419 | 184.498 |
| 8.00E+15 | 0.25 | 0.4  | 7.00E+17 | 0.429 | 226.992 |
| 8.00E+15 | 0.25 | 0.4  | 8.00E+17 | 0.431 | 274.481 |
| 8.00E+15 | 0.25 | 0.4  | 9.00E+17 | 0.440 | 327.302 |

|          |      |      |          |       |         |
|----------|------|------|----------|-------|---------|
| 8.00E+15 | 0.25 | 0.4  | 1.00E+18 | 0.438 | 385.103 |
| 8.00E+15 | 0.3  | 0.15 | 3.00E+17 | 0.299 | 47.527  |
| 8.00E+15 | 0.3  | 0.15 | 4.00E+17 | 0.311 | 57.429  |
| 8.00E+15 | 0.3  | 0.15 | 5.00E+17 | 0.320 | 67.814  |
| 8.00E+15 | 0.3  | 0.15 | 6.00E+17 | 0.327 | 78.708  |
| 8.00E+15 | 0.3  | 0.15 | 7.00E+17 | 0.333 | 90.194  |
| 8.00E+15 | 0.3  | 0.15 | 8.00E+17 | 0.337 | 101.978 |
| 8.00E+15 | 0.3  | 0.15 | 9.00E+17 | 0.341 | 114.170 |
| 8.00E+15 | 0.3  | 0.15 | 1.00E+18 | 0.343 | 126.779 |
| 8.00E+15 | 0.3  | 0.2  | 3.00E+17 | 0.326 | 57.954  |
| 8.00E+15 | 0.3  | 0.2  | 4.00E+17 | 0.338 | 72.242  |
| 8.00E+15 | 0.3  | 0.2  | 5.00E+17 | 0.348 | 88.853  |
| 8.00E+15 | 0.3  | 0.2  | 6.00E+17 | 0.354 | 103.582 |
| 8.00E+15 | 0.3  | 0.2  | 7.00E+17 | 0.359 | 120.493 |
| 8.00E+15 | 0.3  | 0.2  | 8.00E+17 | 0.363 | 138.433 |
| 8.00E+15 | 0.3  | 0.2  | 9.00E+17 | 0.364 | 158.038 |
| 8.00E+15 | 0.3  | 0.2  | 1.00E+18 | 0.366 | 179.662 |
| 8.00E+15 | 0.3  | 0.25 | 3.00E+17 | 0.351 | 67.960  |
| 8.00E+15 | 0.3  | 0.25 | 4.00E+17 | 0.367 | 86.657  |
| 8.00E+15 | 0.3  | 0.25 | 5.00E+17 | 0.374 | 106.437 |
| 8.00E+15 | 0.3  | 0.25 | 6.00E+17 | 0.380 | 127.551 |
| 8.00E+15 | 0.3  | 0.25 | 7.00E+17 | 0.387 | 150.984 |
| 8.00E+15 | 0.3  | 0.25 | 8.00E+17 | 0.395 | 177.247 |
| 8.00E+15 | 0.3  | 0.25 | 9.00E+17 | 0.393 | 209.012 |
| 8.00E+15 | 0.3  | 0.25 | 1.00E+18 | 0.398 | 238.242 |
| 8.00E+15 | 0.3  | 0.3  | 3.00E+17 | 0.371 | 77.966  |
| 8.00E+15 | 0.3  | 0.3  | 4.00E+17 | 0.394 | 100.989 |
| 8.00E+15 | 0.3  | 0.3  | 5.00E+17 | 0.403 | 125.667 |
| 8.00E+15 | 0.3  | 0.3  | 6.00E+17 | 0.411 | 155.632 |
| 8.00E+15 | 0.3  | 0.3  | 7.00E+17 | 0.419 | 185.720 |
| 8.00E+15 | 0.3  | 0.3  | 8.00E+17 | 0.424 | 224.608 |
| 8.00E+15 | 0.3  | 0.3  | 9.00E+17 | 0.426 | 261.357 |
| 8.00E+15 | 0.3  | 0.3  | 1.00E+18 | 0.433 | 308.667 |
| 8.00E+15 | 0.3  | 0.35 | 3.00E+17 | 0.396 | 87.958  |
| 8.00E+15 | 0.3  | 0.35 | 4.00E+17 | 0.422 | 115.330 |
| 8.00E+15 | 0.3  | 0.35 | 5.00E+17 | 0.433 | 146.156 |
| 8.00E+15 | 0.3  | 0.35 | 6.00E+17 | 0.440 | 182.228 |
| 8.00E+15 | 0.3  | 0.35 | 7.00E+17 | 0.456 | 227.142 |
| 8.00E+15 | 0.3  | 0.35 | 8.00E+17 | 0.456 | 270.805 |
| 8.00E+15 | 0.3  | 0.35 | 9.00E+17 | 0.464 | 326.912 |
| 8.00E+15 | 0.3  | 0.35 | 1.00E+18 | 0.467 | 379.663 |
| 8.00E+15 | 0.3  | 0.4  | 3.00E+17 | 0.419 | 99.261  |
| 8.00E+15 | 0.3  | 0.4  | 4.00E+17 | 0.447 | 130.125 |
| 8.00E+15 | 0.3  | 0.4  | 5.00E+17 | 0.456 | 170.886 |
| 8.00E+15 | 0.3  | 0.4  | 6.00E+17 | 0.475 | 213.962 |
| 8.00E+15 | 0.3  | 0.4  | 7.00E+17 | 0.490 | 266.166 |
| 8.00E+15 | 0.3  | 0.4  | 8.00E+17 | 0.490 | 329.108 |
| 8.00E+15 | 0.3  | 0.4  | 9.00E+17 | 0.496 | 390.203 |
| 8.00E+15 | 0.3  | 0.4  | 1.00E+18 | 0.505 | 467.020 |
| 8.00E+15 | 0.35 | 0.15 | 3.00E+17 | 0.308 | 50.744  |
| 8.00E+15 | 0.35 | 0.15 | 4.00E+17 | 0.325 | 61.706  |
| 8.00E+15 | 0.35 | 0.15 | 5.00E+17 | 0.336 | 73.204  |
| 8.00E+15 | 0.35 | 0.15 | 6.00E+17 | 0.347 | 85.452  |
| 8.00E+15 | 0.35 | 0.15 | 7.00E+17 | 0.358 | 98.118  |
| 8.00E+15 | 0.35 | 0.15 | 8.00E+17 | 0.359 | 111.285 |
| 8.00E+15 | 0.35 | 0.15 | 9.00E+17 | 0.362 | 124.962 |
| 8.00E+15 | 0.35 | 0.15 | 1.00E+18 | 0.365 | 139.710 |
| 8.00E+15 | 0.35 | 0.2  | 3.00E+17 | 0.342 | 62.407  |

|          |      |      |          |       |         |
|----------|------|------|----------|-------|---------|
| 8.00E+15 | 0.35 | 0.2  | 4.00E+17 | 0.363 | 78.351  |
| 8.00E+15 | 0.35 | 0.2  | 5.00E+17 | 0.373 | 95.504  |
| 8.00E+15 | 0.35 | 0.2  | 6.00E+17 | 0.381 | 113.475 |
| 8.00E+15 | 0.35 | 0.2  | 7.00E+17 | 0.396 | 132.677 |
| 8.00E+15 | 0.35 | 0.2  | 8.00E+17 | 0.396 | 153.897 |
| 8.00E+15 | 0.35 | 0.2  | 9.00E+17 | 0.398 | 177.423 |
| 8.00E+15 | 0.35 | 0.2  | 1.00E+18 | 0.402 | 203.097 |
| 8.00E+15 | 0.35 | 0.25 | 3.00E+17 | 0.375 | 73.725  |
| 8.00E+15 | 0.35 | 0.25 | 4.00E+17 | 0.402 | 94.711  |
| 8.00E+15 | 0.35 | 0.25 | 5.00E+17 | 0.412 | 117.056 |
| 8.00E+15 | 0.35 | 0.25 | 6.00E+17 | 0.416 | 141.746 |
| 8.00E+15 | 0.35 | 0.25 | 7.00E+17 | 0.435 | 169.698 |
| 8.00E+15 | 0.35 | 0.25 | 8.00E+17 | 0.434 | 201.246 |
| 8.00E+15 | 0.35 | 0.25 | 9.00E+17 | 0.433 | 222.394 |
| 8.00E+15 | 0.35 | 0.25 | 1.00E+18 | 0.445 | 244.455 |
| 8.00E+15 | 0.35 | 0.3  | 3.00E+17 | 0.411 | 85.226  |
| 8.00E+15 | 0.35 | 0.3  | 4.00E+17 | 0.438 | 111.076 |
| 8.00E+15 | 0.35 | 0.3  | 5.00E+17 | 0.450 | 139.934 |
| 8.00E+15 | 0.35 | 0.3  | 6.00E+17 | 0.462 | 173.488 |
| 8.00E+15 | 0.35 | 0.3  | 7.00E+17 | 0.472 | 211.903 |
| 8.00E+15 | 0.35 | 0.3  | 8.00E+17 | 0.469 | 255.171 |
| 8.00E+15 | 0.35 | 0.3  | 9.00E+17 | 0.482 | 303.171 |
| 8.00E+15 | 0.35 | 0.3  | 1.00E+18 | 0.487 | 355.659 |
| 8.00E+15 | 0.35 | 0.35 | 3.00E+17 | 0.440 | 96.528  |
| 8.00E+15 | 0.35 | 0.35 | 4.00E+17 | 0.473 | 127.884 |
| 8.00E+15 | 0.35 | 0.35 | 5.00E+17 | 0.492 | 164.999 |
| 8.00E+15 | 0.35 | 0.35 | 6.00E+17 | 0.500 | 208.802 |
| 8.00E+15 | 0.35 | 0.35 | 7.00E+17 | 0.511 | 259.057 |
| 8.00E+15 | 0.35 | 0.35 | 8.00E+17 | 0.520 | 315.698 |
| 8.00E+15 | 0.35 | 0.35 | 9.00E+17 | 0.525 | 378.397 |
| 8.00E+15 | 0.35 | 0.35 | 1.00E+18 | 0.532 | 447.102 |
| 8.00E+15 | 0.35 | 0.4  | 3.00E+17 | 0.469 | 108.038 |
| 8.00E+15 | 0.35 | 0.4  | 4.00E+17 | 0.518 | 146.145 |
| 8.00E+15 | 0.35 | 0.4  | 5.00E+17 | 0.531 | 192.723 |
| 8.00E+15 | 0.35 | 0.4  | 6.00E+17 | 0.539 | 247.702 |
| 8.00E+15 | 0.35 | 0.4  | 7.00E+17 | 0.552 | 311.024 |
| 8.00E+15 | 0.35 | 0.4  | 8.00E+17 | 0.563 | 382.243 |
| 8.00E+15 | 0.35 | 0.4  | 9.00E+17 | 0.575 | 347.148 |
| 8.00E+15 | 0.35 | 0.4  | 1.00E+18 | 0.585 | 543.811 |
| 8.00E+15 | 0.4  | 0.15 | 3.00E+17 | 0.321 | 52.702  |
| 8.00E+15 | 0.4  | 0.15 | 4.00E+17 | 0.341 | 64.537  |
| 8.00E+15 | 0.4  | 0.15 | 5.00E+17 | 0.357 | 77.064  |
| 8.00E+15 | 0.4  | 0.15 | 6.00E+17 | 0.376 | 90.402  |
| 8.00E+15 | 0.4  | 0.15 | 7.00E+17 | 0.386 | 104.190 |
| 8.00E+15 | 0.4  | 0.15 | 8.00E+17 | 0.392 | 118.619 |
| 8.00E+15 | 0.4  | 0.15 | 9.00E+17 | 0.394 | 134.064 |
| 8.00E+15 | 0.4  | 0.15 | 1.00E+18 | 0.398 | 150.756 |
| 8.00E+15 | 0.4  | 0.2  | 3.00E+17 | 0.365 | 65.303  |
| 8.00E+15 | 0.4  | 0.2  | 4.00E+17 | 0.388 | 82.744  |
| 8.00E+15 | 0.4  | 0.2  | 5.00E+17 | 0.410 | 101.292 |
| 8.00E+15 | 0.4  | 0.2  | 6.00E+17 | 0.419 | 120.941 |
| 8.00E+15 | 0.4  | 0.2  | 7.00E+17 | 0.434 | 142.796 |
| 8.00E+15 | 0.4  | 0.2  | 8.00E+17 | 0.441 | 166.979 |
| 8.00E+15 | 0.4  | 0.2  | 9.00E+17 | 0.438 | 193.985 |
| 8.00E+15 | 0.4  | 0.2  | 1.00E+18 | 0.448 | 223.144 |
| 8.00E+15 | 0.4  | 0.25 | 3.00E+17 | 0.404 | 77.812  |
| 8.00E+15 | 0.4  | 0.25 | 4.00E+17 | 0.442 | 100.628 |
| 8.00E+15 | 0.4  | 0.25 | 5.00E+17 | 0.457 | 125.328 |

|          |      |      |          |       |         |
|----------|------|------|----------|-------|---------|
| 8.00E+15 | 0.4  | 0.25 | 6.00E+17 | 0.469 | 153.452 |
| 8.00E+15 | 0.4  | 0.25 | 7.00E+17 | 0.481 | 185.933 |
| 8.00E+15 | 0.4  | 0.25 | 8.00E+17 | 0.488 | 222.128 |
| 8.00E+15 | 0.4  | 0.25 | 9.00E+17 | 0.491 | 262.109 |
| 8.00E+15 | 0.4  | 0.25 | 1.00E+18 | 0.498 | 305.571 |
| 8.00E+15 | 0.4  | 0.3  | 3.00E+17 | 0.446 | 90.523  |
| 8.00E+15 | 0.4  | 0.3  | 4.00E+17 | 0.490 | 118.934 |
| 8.00E+15 | 0.4  | 0.3  | 5.00E+17 | 0.509 | 151.909 |
| 8.00E+15 | 0.4  | 0.3  | 6.00E+17 | 0.518 | 190.817 |
| 8.00E+15 | 0.4  | 0.3  | 7.00E+17 | 0.533 | 235.309 |
| 8.00E+15 | 0.4  | 0.3  | 8.00E+17 | 0.537 | 285.147 |
| 8.00E+15 | 0.4  | 0.3  | 9.00E+17 | 0.550 | 340.484 |
| 8.00E+15 | 0.4  | 0.3  | 1.00E+18 | 0.555 | 401.398 |
| 8.00E+15 | 0.4  | 0.35 | 3.00E+17 | 0.489 | 103.082 |
| 8.00E+15 | 0.4  | 0.35 | 4.00E+17 | 0.538 | 138.514 |
| 8.00E+15 | 0.4  | 0.35 | 5.00E+17 | 0.558 | 181.763 |
| 8.00E+15 | 0.4  | 0.35 | 6.00E+17 | 0.576 | 232.442 |
| 8.00E+15 | 0.4  | 0.35 | 7.00E+17 | 0.583 | 290.512 |
| 8.00E+15 | 0.4  | 0.35 | 8.00E+17 | 0.596 | 355.979 |
| 8.00E+15 | 0.4  | 0.35 | 9.00E+17 | 0.601 | 429.020 |
| 8.00E+15 | 0.4  | 0.35 | 1.00E+18 | 0.614 | 507.481 |
| 8.00E+15 | 0.4  | 0.4  | 3.00E+17 | 0.538 | 116.003 |
| 8.00E+15 | 0.4  | 0.4  | 4.00E+17 | 0.593 | 160.210 |
| 8.00E+15 | 0.4  | 0.4  | 5.00E+17 | 0.613 | 214.471 |
| 8.00E+15 | 0.4  | 0.4  | 6.00E+17 | 0.629 | 278.412 |
| 8.00E+15 | 0.4  | 0.4  | 7.00E+17 | 0.642 | 351.899 |
| 8.00E+15 | 0.4  | 0.4  | 8.00E+17 | 0.650 | 435.047 |
| 8.00E+15 | 0.4  | 0.4  | 9.00E+17 | 0.668 | 524.555 |
| 8.00E+15 | 0.4  | 0.4  | 1.00E+18 | 0.676 | 612.866 |
| 8.00E+15 | 0.45 | 0.15 | 3.00E+17 | 0.337 | 54.678  |
| 8.00E+15 | 0.45 | 0.15 | 4.00E+17 | 0.359 | 67.388  |
| 8.00E+15 | 0.45 | 0.15 | 5.00E+17 | 0.381 | 80.998  |
| 8.00E+15 | 0.45 | 0.15 | 6.00E+17 | 0.408 | 95.285  |
| 8.00E+15 | 0.45 | 0.15 | 7.00E+17 | 0.419 | 110.285 |
| 8.00E+15 | 0.45 | 0.15 | 8.00E+17 | 0.431 | 126.181 |
| 8.00E+15 | 0.45 | 0.15 | 9.00E+17 | 0.434 | 143.615 |
| 8.00E+15 | 0.45 | 0.15 | 1.00E+18 | 0.436 | 162.509 |
| 8.00E+15 | 0.45 | 0.2  | 3.00E+17 | 0.391 | 68.264  |
| 8.00E+15 | 0.45 | 0.2  | 4.00E+17 | 0.429 | 87.125  |
| 8.00E+15 | 0.45 | 0.2  | 5.00E+17 | 0.453 | 107.311 |
| 8.00E+15 | 0.45 | 0.2  | 6.00E+17 | 0.466 | 129.121 |
| 8.00E+15 | 0.45 | 0.2  | 7.00E+17 | 0.478 | 153.674 |
| 8.00E+15 | 0.45 | 0.2  | 8.00E+17 | 0.488 | 181.498 |
| 8.00E+15 | 0.45 | 0.2  | 9.00E+17 | 0.494 | 211.903 |
| 8.00E+15 | 0.45 | 0.2  | 1.00E+18 | 0.500 | 245.453 |
| 8.00E+15 | 0.45 | 0.25 | 3.00E+17 | 0.448 | 82.025  |
| 8.00E+15 | 0.45 | 0.25 | 4.00E+17 | 0.487 | 106.714 |
| 8.00E+15 | 0.45 | 0.25 | 5.00E+17 | 0.510 | 134.235 |
| 8.00E+15 | 0.45 | 0.25 | 6.00E+17 | 0.528 | 165.830 |
| 8.00E+15 | 0.45 | 0.25 | 7.00E+17 | 0.538 | 203.050 |
| 8.00E+15 | 0.45 | 0.25 | 8.00E+17 | 0.550 | 244.276 |
| 8.00E+15 | 0.45 | 0.25 | 9.00E+17 | 0.559 | 289.904 |
| 8.00E+15 | 0.45 | 0.25 | 1.00E+18 | 0.567 | 339.956 |
| 8.00E+15 | 0.45 | 0.3  | 3.00E+17 | 0.505 | 95.804  |
| 8.00E+15 | 0.45 | 0.3  | 4.00E+17 | 0.559 | 127.310 |
| 8.00E+15 | 0.45 | 0.3  | 5.00E+17 | 0.560 | 164.872 |
| 8.00E+15 | 0.45 | 0.3  | 6.00E+17 | 0.580 | 209.094 |
| 8.00E+15 | 0.45 | 0.3  | 7.00E+17 | 0.612 | 259.932 |

|          |      |      |          |       |         |
|----------|------|------|----------|-------|---------|
| 8.00E+15 | 0.45 | 0.3  | 8.00E+17 | 0.616 | 317.059 |
| 8.00E+15 | 0.45 | 0.3  | 9.00E+17 | 0.626 | 380.372 |
| 8.00E+15 | 0.45 | 0.3  | 1.00E+18 | 0.638 | 449.792 |
| 8.00E+15 | 0.45 | 0.35 | 3.00E+17 | 0.566 | 109.655 |
| 8.00E+15 | 0.45 | 0.35 | 4.00E+17 | 0.618 | 149.769 |
| 8.00E+15 | 0.45 | 0.35 | 5.00E+17 | 0.642 | 199.054 |
| 8.00E+15 | 0.45 | 0.35 | 6.00E+17 | 0.650 | 257.149 |
| 8.00E+15 | 0.45 | 0.35 | 7.00E+17 | 0.680 | 323.706 |
| 8.00E+15 | 0.45 | 0.35 | 8.00E+17 | 0.689 | 398.774 |
| 8.00E+15 | 0.45 | 0.35 | 9.00E+17 | 0.707 | 481.546 |
| 8.00E+15 | 0.45 | 0.35 | 1.00E+18 | 0.720 | 567.151 |
| 8.00E+15 | 0.45 | 0.4  | 3.00E+17 | 0.628 | 124.522 |
| 8.00E+15 | 0.45 | 0.4  | 4.00E+17 | 0.689 | 175.116 |
| 8.00E+15 | 0.45 | 0.4  | 5.00E+17 | 0.719 | 236.926 |
| 8.00E+15 | 0.45 | 0.4  | 6.00E+17 | 0.744 | 304.146 |
| 8.00E+15 | 0.45 | 0.4  | 7.00E+17 | 0.758 | 394.645 |
| 8.00E+15 | 0.45 | 0.4  | 8.00E+17 | 0.782 | 489.171 |
| 8.00E+15 | 0.45 | 0.4  | 9.00E+17 | 0.793 | 586.342 |
| 8.00E+15 | 0.45 | 0.4  | 1.00E+18 | 0.806 | 681.180 |
| 8.00E+15 | 0.5  | 0.15 | 3.00E+17 | 0.356 | 102.762 |
| 8.00E+15 | 0.5  | 0.15 | 4.00E+17 | 0.381 | 122.724 |
| 8.00E+15 | 0.5  | 0.15 | 5.00E+17 | 0.413 | 142.131 |
| 8.00E+15 | 0.5  | 0.15 | 6.00E+17 | 0.442 | 164.440 |
| 8.00E+15 | 0.5  | 0.15 | 7.00E+17 | 0.463 | 190.644 |
| 8.00E+15 | 0.5  | 0.15 | 8.00E+17 | 0.466 | 146.391 |
| 8.00E+15 | 0.5  | 0.15 | 9.00E+17 | 0.484 | 156.446 |
| 8.00E+15 | 0.5  | 0.15 | 1.00E+18 | 0.487 | 166.506 |
| 8.00E+15 | 0.5  | 0.2  | 3.00E+17 | 0.421 | 125.283 |
| 8.00E+15 | 0.5  | 0.2  | 4.00E+17 | 0.467 | 153.861 |
| 8.00E+15 | 0.5  | 0.2  | 5.00E+17 | 0.482 | 183.169 |
| 8.00E+15 | 0.5  | 0.2  | 6.00E+17 | 0.522 | 223.741 |
| 8.00E+15 | 0.5  | 0.2  | 7.00E+17 | 0.534 | 264.965 |
| 8.00E+15 | 0.5  | 0.2  | 8.00E+17 | 0.547 | 310.120 |
| 8.00E+15 | 0.5  | 0.2  | 9.00E+17 | 0.545 | 359.076 |
| 8.00E+15 | 0.5  | 0.2  | 1.00E+18 | 0.562 | 412.303 |
| 8.00E+15 | 0.5  | 0.25 | 3.00E+17 | 0.496 | 146.288 |
| 8.00E+15 | 0.5  | 0.25 | 4.00E+17 | 0.552 | 188.740 |
| 8.00E+15 | 0.5  | 0.25 | 5.00E+17 | 0.579 | 236.408 |
| 8.00E+15 | 0.5  | 0.25 | 6.00E+17 | 0.602 | 279.091 |
| 8.00E+15 | 0.5  | 0.25 | 7.00E+17 | 0.616 | 318.669 |
| 8.00E+15 | 0.5  | 0.25 | 8.00E+17 | 0.632 | 417.518 |
| 8.00E+15 | 0.5  | 0.25 | 9.00E+17 | 0.642 | 487.952 |
| 8.00E+15 | 0.5  | 0.25 | 1.00E+18 | 0.646 | 564.857 |
| 8.00E+15 | 0.5  | 0.3  | 3.00E+17 | 0.571 | 171.562 |
| 8.00E+15 | 0.5  | 0.3  | 4.00E+17 | 0.633 | 183.331 |
| 8.00E+15 | 0.5  | 0.3  | 5.00E+17 | 0.660 | 291.124 |
| 8.00E+15 | 0.5  | 0.3  | 6.00E+17 | 0.672 | 364.676 |
| 8.00E+15 | 0.5  | 0.3  | 7.00E+17 | 0.708 | 447.522 |
| 8.00E+15 | 0.5  | 0.3  | 1.00E+18 | 0.746 | 713.805 |
| 8.00E+15 | 0.5  | 0.35 | 3.00E+17 | 0.637 | 172.392 |
| 8.00E+15 | 0.5  | 0.35 | 4.00E+17 | 0.713 | 267.587 |
| 8.00E+15 | 0.5  | 0.35 | 5.00E+17 | 0.742 | 284.295 |
| 8.00E+15 | 0.5  | 0.35 | 6.00E+17 | 0.781 | 446.094 |
| 8.00E+15 | 0.5  | 0.35 | 7.00E+17 | 0.780 | 547.624 |
| 8.00E+15 | 0.5  | 0.35 | 8.00E+17 | 0.822 | 653.503 |
| 8.00E+15 | 0.5  | 0.35 | 9.00E+17 | 0.837 | 755.605 |
| 8.00E+15 | 0.5  | 0.35 | 1.00E+18 | 0.849 | 854.287 |
| 8.00E+15 | 0.5  | 0.4  | 3.00E+17 | 0.726 | 225.225 |

|          |     |      |          |       |          |
|----------|-----|------|----------|-------|----------|
| 8.00E+15 | 0.5 | 0.4  | 4.00E+17 | 0.805 | 312.164  |
| 8.00E+15 | 0.5 | 0.4  | 5.00E+17 | 0.838 | 415.163  |
| 8.00E+15 | 0.5 | 0.4  | 6.00E+17 | 0.885 | 530.020  |
| 8.00E+15 | 0.5 | 0.4  | 7.00E+17 | 0.902 | 460.406  |
| 8.00E+15 | 0.5 | 0.4  | 8.00E+17 | 0.928 | 766.888  |
| 8.00E+15 | 0.5 | 0.4  | 9.00E+17 | 0.951 | 879.531  |
| 8.00E+15 | 0.5 | 0.4  | 1.00E+18 | 0.972 | 986.738  |
| 8.00E+15 | 0.6 | 0.15 | 3.00E+17 | 0.394 | 106.756  |
| 8.00E+15 | 0.6 | 0.15 | 4.00E+17 | 0.430 | 125.986  |
| 8.00E+15 | 0.6 | 0.15 | 5.00E+17 | 0.479 | 143.374  |
| 8.00E+15 | 0.6 | 0.15 | 6.00E+17 | 0.532 | 155.002  |
| 8.00E+15 | 0.6 | 0.15 | 7.00E+17 | 0.564 | 203.642  |
| 8.00E+15 | 0.6 | 0.15 | 8.00E+17 | 0.588 | 234.521  |
| 8.00E+15 | 0.6 | 0.15 | 9.00E+17 | 0.606 | 267.455  |
| 8.00E+15 | 0.6 | 0.15 | 1.00E+18 | 0.618 | 303.059  |
| 8.00E+15 | 0.6 | 0.2  | 3.00E+17 | 0.486 | 129.438  |
| 8.00E+15 | 0.6 | 0.2  | 4.00E+17 | 0.569 | 161.439  |
| 8.00E+15 | 0.6 | 0.2  | 5.00E+17 | 0.631 | 199.958  |
| 8.00E+15 | 0.6 | 0.2  | 6.00E+17 | 0.656 | 242.219  |
| 8.00E+15 | 0.6 | 0.2  | 7.00E+17 | 0.688 | 288.938  |
| 8.00E+15 | 0.6 | 0.2  | 8.00E+17 | 0.714 | 340.510  |
| 8.00E+15 | 0.6 | 0.2  | 9.00E+17 | 0.721 | 396.762  |
| 8.00E+15 | 0.6 | 0.2  | 1.00E+18 | 0.740 | 457.485  |
| 8.00E+15 | 0.6 | 0.25 | 3.00E+17 | 0.627 | 154.867  |
| 8.00E+15 | 0.6 | 0.25 | 4.00E+17 | 0.688 | 201.315  |
| 8.00E+15 | 0.6 | 0.25 | 5.00E+17 | 0.746 | 257.285  |
| 8.00E+15 | 0.6 | 0.25 | 6.00E+17 | 0.794 | 319.295  |
| 8.00E+15 | 0.6 | 0.25 | 7.00E+17 | 0.822 | 388.931  |
| 8.00E+15 | 0.6 | 0.25 | 8.00E+17 | 0.843 | 465.727  |
| 8.00E+15 | 0.6 | 0.25 | 9.00E+17 | 0.848 | 546.697  |
| 8.00E+15 | 0.6 | 0.25 | 1.00E+18 | 0.887 | 627.515  |
| 8.00E+15 | 0.6 | 0.3  | 3.00E+17 | 0.744 | 184.326  |
| 8.00E+15 | 0.6 | 0.3  | 4.00E+17 | 0.839 | 247.357  |
| 8.00E+15 | 0.6 | 0.3  | 5.00E+17 | 0.910 | 221.519  |
| 8.00E+15 | 0.6 | 0.3  | 6.00E+17 | 0.939 | 406.494  |
| 8.00E+15 | 0.6 | 0.3  | 7.00E+17 | 0.987 | 501.661  |
| 8.00E+15 | 0.6 | 0.3  | 8.00E+17 | 1.004 | 599.451  |
| 8.00E+15 | 0.6 | 0.3  | 9.00E+17 | 1.043 | 695.970  |
| 8.00E+15 | 0.6 | 0.3  | 1.00E+18 | 1.057 | 791.090  |
| 8.00E+15 | 0.6 | 0.35 | 3.00E+17 | 0.876 | 214.181  |
| 8.00E+15 | 0.6 | 0.35 | 4.00E+17 | 0.985 | 295.586  |
| 8.00E+15 | 0.6 | 0.35 | 5.00E+17 | 1.089 | 391.958  |
| 8.00E+15 | 0.6 | 0.35 | 6.00E+17 | 1.114 | 502.127  |
| 8.00E+15 | 0.6 | 0.35 | 7.00E+17 | 1.159 | 615.891  |
| 8.00E+15 | 0.6 | 0.35 | 8.00E+17 | 1.199 | 728.473  |
| 8.00E+15 | 0.6 | 0.35 | 9.00E+17 | 1.230 | 839.007  |
| 8.00E+15 | 0.6 | 0.35 | 1.00E+18 | 1.261 | 945.608  |
| 8.00E+15 | 0.6 | 0.4  | 3.00E+17 | 1.042 | 247.059  |
| 8.00E+15 | 0.6 | 0.4  | 4.00E+17 | 1.154 | 348.609  |
| 8.00E+15 | 0.6 | 0.4  | 5.00E+17 | 1.295 | 426.646  |
| 8.00E+15 | 0.6 | 0.4  | 6.00E+17 | 1.304 | 596.647  |
| 8.00E+15 | 0.6 | 0.4  | 7.00E+17 | 1.373 | 727.716  |
| 8.00E+15 | 0.6 | 0.4  | 8.00E+17 | 1.410 | 853.835  |
| 8.00E+15 | 0.6 | 0.4  | 9.00E+17 | 1.464 | 975.068  |
| 8.00E+15 | 0.6 | 0.4  | 1.00E+18 | 1.500 | 1089.290 |
| 1.00E+16 | 0.2 | 0.15 | 3.00E+17 | 0.226 | 48.480   |
| 1.00E+16 | 0.2 | 0.15 | 4.00E+17 | 0.232 | 56.450   |
| 1.00E+16 | 0.2 | 0.15 | 5.00E+17 | 0.236 | 64.848   |

|          |      |      |          |       |         |
|----------|------|------|----------|-------|---------|
| 1.00E+16 | 0.2  | 0.15 | 6.00E+17 | 0.240 | 73.674  |
| 1.00E+16 | 0.2  | 0.15 | 7.00E+17 | 0.242 | 82.807  |
| 1.00E+16 | 0.2  | 0.15 | 8.00E+17 | 0.243 | 92.101  |
| 1.00E+16 | 0.2  | 0.15 | 9.00E+17 | 0.244 | 101.924 |
| 1.00E+16 | 0.2  | 0.15 | 1.00E+18 | 0.245 | 111.957 |
| 1.00E+16 | 0.2  | 0.2  | 3.00E+17 | 0.238 | 56.523  |
| 1.00E+16 | 0.2  | 0.2  | 4.00E+17 | 0.244 | 67.863  |
| 1.00E+16 | 0.2  | 0.2  | 5.00E+17 | 0.248 | 79.910  |
| 1.00E+16 | 0.2  | 0.2  | 6.00E+17 | 0.250 | 91.733  |
| 1.00E+16 | 0.2  | 0.2  | 7.00E+17 | 0.252 | 105.526 |
| 1.00E+16 | 0.2  | 0.2  | 8.00E+17 | 0.255 | 119.146 |
| 1.00E+16 | 0.2  | 0.2  | 9.00E+17 | 0.256 | 132.059 |
| 1.00E+16 | 0.2  | 0.2  | 1.00E+18 | 0.258 | 147.484 |
| 1.00E+16 | 0.2  | 0.25 | 3.00E+17 | 0.250 | 64.493  |
| 1.00E+16 | 0.2  | 0.25 | 4.00E+17 | 0.256 | 79.253  |
| 1.00E+16 | 0.2  | 0.25 | 5.00E+17 | 0.259 | 94.696  |
| 1.00E+16 | 0.2  | 0.25 | 6.00E+17 | 0.263 | 111.280 |
| 1.00E+16 | 0.2  | 0.25 | 7.00E+17 | 0.264 | 128.323 |
| 1.00E+16 | 0.2  | 0.25 | 8.00E+17 | 0.266 | 145.949 |
| 1.00E+16 | 0.2  | 0.25 | 9.00E+17 | 0.268 | 164.235 |
| 1.00E+16 | 0.2  | 0.25 | 1.00E+18 | 0.269 | 183.787 |
| 1.00E+16 | 0.2  | 0.3  | 3.00E+17 | 0.261 | 72.408  |
| 1.00E+16 | 0.2  | 0.3  | 4.00E+17 | 0.265 | 90.307  |
| 1.00E+16 | 0.2  | 0.3  | 5.00E+17 | 0.269 | 109.685 |
| 1.00E+16 | 0.2  | 0.3  | 6.00E+17 | 0.273 | 129.810 |
| 1.00E+16 | 0.2  | 0.3  | 7.00E+17 | 0.275 | 150.776 |
| 1.00E+16 | 0.2  | 0.3  | 8.00E+17 | 0.276 | 171.895 |
| 1.00E+16 | 0.2  | 0.3  | 9.00E+17 | 0.278 | 197.137 |
| 1.00E+16 | 0.2  | 0.3  | 1.00E+18 | 0.278 | 223.502 |
| 1.00E+16 | 0.2  | 0.35 | 3.00E+17 | 0.270 | 80.054  |
| 1.00E+16 | 0.2  | 0.35 | 4.00E+17 | 0.274 | 101.250 |
| 1.00E+16 | 0.2  | 0.35 | 5.00E+17 | 0.279 | 124.203 |
| 1.00E+16 | 0.2  | 0.35 | 6.00E+17 | 0.281 | 147.921 |
| 1.00E+16 | 0.2  | 0.35 | 7.00E+17 | 0.285 | 173.394 |
| 1.00E+16 | 0.2  | 0.35 | 8.00E+17 | 0.287 | 201.540 |
| 1.00E+16 | 0.2  | 0.35 | 9.00E+17 | 0.288 | 232.800 |
| 1.00E+16 | 0.2  | 0.35 | 1.00E+18 | 0.289 | 265.088 |
| 1.00E+16 | 0.2  | 0.4  | 3.00E+17 | 0.279 | 87.499  |
| 1.00E+16 | 0.2  | 0.4  | 4.00E+17 | 0.284 | 112.187 |
| 1.00E+16 | 0.2  | 0.4  | 5.00E+17 | 0.289 | 138.447 |
| 1.00E+16 | 0.2  | 0.4  | 6.00E+17 | 0.291 | 166.401 |
| 1.00E+16 | 0.2  | 0.4  | 7.00E+17 | 0.297 | 197.579 |
| 1.00E+16 | 0.2  | 0.4  | 8.00E+17 | 0.297 | 232.678 |
| 1.00E+16 | 0.2  | 0.4  | 9.00E+17 | 0.300 | 271.448 |
| 1.00E+16 | 0.2  | 0.4  | 1.00E+18 | 0.302 | 312.477 |
| 1.00E+16 | 0.25 | 0.15 | 3.00E+17 | 0.232 | 41.417  |
| 1.00E+16 | 0.25 | 0.15 | 4.00E+17 | 0.240 | 49.402  |
| 1.00E+16 | 0.25 | 0.15 | 5.00E+17 | 0.245 | 57.685  |
| 1.00E+16 | 0.25 | 0.15 | 6.00E+17 | 0.249 | 66.593  |
| 1.00E+16 | 0.25 | 0.15 | 7.00E+17 | 0.253 | 75.822  |
| 1.00E+16 | 0.25 | 0.15 | 8.00E+17 | 0.256 | 85.300  |
| 1.00E+16 | 0.25 | 0.15 | 9.00E+17 | 0.257 | 95.129  |
| 1.00E+16 | 0.25 | 0.15 | 1.00E+18 | 0.257 | 105.298 |
| 1.00E+16 | 0.25 | 0.2  | 3.00E+17 | 0.246 | 49.909  |
| 1.00E+16 | 0.25 | 0.2  | 4.00E+17 | 0.256 | 61.445  |
| 1.00E+16 | 0.25 | 0.2  | 5.00E+17 | 0.261 | 73.877  |
| 1.00E+16 | 0.25 | 0.2  | 6.00E+17 | 0.264 | 86.829  |
| 1.00E+16 | 0.25 | 0.2  | 7.00E+17 | 0.266 | 100.430 |



|          |      |      |          |       |         |
|----------|------|------|----------|-------|---------|
| 1.00E+16 | 0.25 | 0.2  | 8.00E+17 | 0.270 | 114.709 |
| 1.00E+16 | 0.25 | 0.2  | 9.00E+17 | 0.271 | 129.265 |
| 1.00E+16 | 0.25 | 0.2  | 1.00E+18 | 0.273 | 144.469 |
| 1.00E+16 | 0.25 | 0.25 | 3.00E+17 | 0.263 | 57.845  |
| 1.00E+16 | 0.25 | 0.25 | 4.00E+17 | 0.269 | 72.963  |
| 1.00E+16 | 0.25 | 0.25 | 5.00E+17 | 0.275 | 88.922  |
| 1.00E+16 | 0.25 | 0.25 | 6.00E+17 | 0.275 | 105.970 |
| 1.00E+16 | 0.25 | 0.25 | 7.00E+17 | 0.279 | 123.737 |
| 1.00E+16 | 0.25 | 0.25 | 8.00E+17 | 0.281 | 142.272 |
| 1.00E+16 | 0.25 | 0.25 | 9.00E+17 | 0.284 | 161.505 |
| 1.00E+16 | 0.25 | 0.25 | 1.00E+18 | 0.285 | 182.426 |
| 1.00E+16 | 0.25 | 0.3  | 3.00E+17 | 0.275 | 65.802  |
| 1.00E+16 | 0.25 | 0.3  | 4.00E+17 | 0.281 | 84.230  |
| 1.00E+16 | 0.25 | 0.3  | 5.00E+17 | 0.288 | 103.978 |
| 1.00E+16 | 0.25 | 0.3  | 6.00E+17 | 0.289 | 124.985 |
| 1.00E+16 | 0.25 | 0.3  | 7.00E+17 | 0.293 | 146.952 |
| 1.00E+16 | 0.25 | 0.3  | 8.00E+17 | 0.296 | 170.445 |
| 1.00E+16 | 0.25 | 0.3  | 9.00E+17 | 0.298 | 196.347 |
| 1.00E+16 | 0.25 | 0.3  | 1.00E+18 | 0.302 | 224.999 |
| 1.00E+16 | 0.25 | 0.35 | 3.00E+17 | 0.285 | 73.599  |
| 1.00E+16 | 0.25 | 0.35 | 4.00E+17 | 0.295 | 95.413  |
| 1.00E+16 | 0.25 | 0.35 | 5.00E+17 | 0.299 | 119.046 |
| 1.00E+16 | 0.25 | 0.35 | 6.00E+17 | 0.304 | 143.966 |
| 1.00E+16 | 0.25 | 0.35 | 7.00E+17 | 0.305 | 171.010 |
| 1.00E+16 | 0.25 | 0.35 | 8.00E+17 | 0.314 | 201.117 |
| 1.00E+16 | 0.25 | 0.35 | 9.00E+17 | 0.311 | 235.133 |
| 1.00E+16 | 0.25 | 0.35 | 1.00E+18 | 0.317 | 272.027 |
| 1.00E+16 | 0.25 | 0.4  | 3.00E+17 | 0.298 | 81.314  |
| 1.00E+16 | 0.25 | 0.4  | 4.00E+17 | 0.306 | 106.798 |
| 1.00E+16 | 0.25 | 0.4  | 5.00E+17 | 0.316 | 134.116 |
| 1.00E+16 | 0.25 | 0.4  | 6.00E+17 | 0.320 | 163.655 |
| 1.00E+16 | 0.25 | 0.4  | 7.00E+17 | 0.323 | 197.129 |
| 1.00E+16 | 0.25 | 0.4  | 8.00E+17 | 0.331 | 235.434 |
| 1.00E+16 | 0.25 | 0.4  | 9.00E+17 | 0.331 | 277.710 |
| 1.00E+16 | 0.25 | 0.4  | 1.00E+18 | 0.333 | 323.966 |
| 1.00E+16 | 0.3  | 0.15 | 3.00E+17 | 0.238 | 43.788  |
| 1.00E+16 | 0.3  | 0.15 | 4.00E+17 | 0.250 | 52.678  |
| 1.00E+16 | 0.3  | 0.15 | 5.00E+17 | 0.256 | 62.176  |
| 1.00E+16 | 0.3  | 0.15 | 6.00E+17 | 0.262 | 72.229  |
| 1.00E+16 | 0.3  | 0.15 | 7.00E+17 | 0.266 | 82.658  |
| 1.00E+16 | 0.3  | 0.15 | 8.00E+17 | 0.269 | 93.457  |
| 1.00E+16 | 0.3  | 0.15 | 9.00E+17 | 0.271 | 104.714 |
| 1.00E+16 | 0.3  | 0.15 | 1.00E+18 | 0.272 | 116.316 |
| 1.00E+16 | 0.3  | 0.2  | 3.00E+17 | 0.260 | 53.215  |
| 1.00E+16 | 0.3  | 0.2  | 4.00E+17 | 0.269 | 66.316  |
| 1.00E+16 | 0.3  | 0.2  | 5.00E+17 | 0.275 | 80.278  |
| 1.00E+16 | 0.3  | 0.2  | 6.00E+17 | 0.280 | 94.930  |
| 1.00E+16 | 0.3  | 0.2  | 7.00E+17 | 0.283 | 110.221 |
| 1.00E+16 | 0.3  | 0.2  | 8.00E+17 | 0.285 | 125.217 |
| 1.00E+16 | 0.3  | 0.2  | 9.00E+17 | 0.288 | 143.317 |
| 1.00E+16 | 0.3  | 0.2  | 1.00E+18 | 0.290 | 160.639 |
| 1.00E+16 | 0.3  | 0.25 | 3.00E+17 | 0.278 | 62.433  |
| 1.00E+16 | 0.3  | 0.25 | 4.00E+17 | 0.286 | 79.419  |
| 1.00E+16 | 0.3  | 0.25 | 5.00E+17 | 0.294 | 97.607  |
| 1.00E+16 | 0.3  | 0.25 | 6.00E+17 | 0.297 | 118.466 |
| 1.00E+16 | 0.3  | 0.25 | 7.00E+17 | 0.301 | 137.164 |
| 1.00E+16 | 0.3  | 0.25 | 8.00E+17 | 0.305 | 160.331 |
| 1.00E+16 | 0.3  | 0.25 | 9.00E+17 | 0.308 | 181.678 |

|          |      |      |          |       |         |
|----------|------|------|----------|-------|---------|
| 1.00E+16 | 0.3  | 0.25 | 1.00E+18 | 0.309 | 206.886 |
| 1.00E+16 | 0.3  | 0.3  | 3.00E+17 | 0.292 | 71.574  |
| 1.00E+16 | 0.3  | 0.3  | 4.00E+17 | 0.303 | 92.534  |
| 1.00E+16 | 0.3  | 0.3  | 5.00E+17 | 0.311 | 115.172 |
| 1.00E+16 | 0.3  | 0.3  | 6.00E+17 | 0.316 | 139.109 |
| 1.00E+16 | 0.3  | 0.3  | 7.00E+17 | 0.322 | 166.745 |
| 1.00E+16 | 0.3  | 0.3  | 8.00E+17 | 0.324 | 193.295 |
| 1.00E+16 | 0.3  | 0.3  | 9.00E+17 | 0.330 | 225.314 |
| 1.00E+16 | 0.3  | 0.3  | 1.00E+18 | 0.330 | 263.560 |
| 1.00E+16 | 0.3  | 0.35 | 3.00E+17 | 0.306 | 80.517  |
| 1.00E+16 | 0.3  | 0.35 | 4.00E+17 | 0.321 | 105.638 |
| 1.00E+16 | 0.3  | 0.35 | 5.00E+17 | 0.331 | 132.600 |
| 1.00E+16 | 0.3  | 0.35 | 6.00E+17 | 0.336 | 161.731 |
| 1.00E+16 | 0.3  | 0.35 | 7.00E+17 | 0.344 | 197.159 |
| 1.00E+16 | 0.3  | 0.35 | 8.00E+17 | 0.347 | 220.891 |
| 1.00E+16 | 0.3  | 0.35 | 9.00E+17 | 0.354 | 277.416 |
| 1.00E+16 | 0.3  | 0.35 | 1.00E+18 | 0.354 | 319.575 |
| 1.00E+16 | 0.3  | 0.4  | 3.00E+17 | 0.320 | 90.815  |
| 1.00E+16 | 0.3  | 0.4  | 4.00E+17 | 0.341 | 118.735 |
| 1.00E+16 | 0.3  | 0.4  | 5.00E+17 | 0.352 | 150.284 |
| 1.00E+16 | 0.3  | 0.4  | 6.00E+17 | 0.360 | 186.274 |
| 1.00E+16 | 0.3  | 0.4  | 7.00E+17 | 0.368 | 228.176 |
| 1.00E+16 | 0.3  | 0.4  | 8.00E+17 | 0.373 | 278.712 |
| 1.00E+16 | 0.3  | 0.4  | 9.00E+17 | 0.378 | 327.598 |
| 1.00E+16 | 0.3  | 0.4  | 1.00E+18 | 0.380 | 387.963 |
| 1.00E+16 | 0.35 | 0.15 | 3.00E+17 | 0.249 | 46.609  |
| 1.00E+16 | 0.35 | 0.15 | 4.00E+17 | 0.261 | 56.419  |
| 1.00E+16 | 0.35 | 0.15 | 5.00E+17 | 0.268 | 67.080  |
| 1.00E+16 | 0.35 | 0.15 | 6.00E+17 | 0.275 | 78.212  |
| 1.00E+16 | 0.35 | 0.15 | 7.00E+17 | 0.279 | 89.775  |
| 1.00E+16 | 0.35 | 0.15 | 8.00E+17 | 0.284 | 101.941 |
| 1.00E+16 | 0.35 | 0.15 | 9.00E+17 | 0.286 | 114.476 |
| 1.00E+16 | 0.35 | 0.15 | 1.00E+18 | 0.290 | 127.392 |
| 1.00E+16 | 0.35 | 0.2  | 3.00E+17 | 0.273 | 57.205  |
| 1.00E+16 | 0.35 | 0.2  | 4.00E+17 | 0.284 | 71.867  |
| 1.00E+16 | 0.35 | 0.2  | 5.00E+17 | 0.296 | 87.397  |
| 1.00E+16 | 0.35 | 0.2  | 6.00E+17 | 0.299 | 104.001 |
| 1.00E+16 | 0.35 | 0.2  | 7.00E+17 | 0.304 | 121.265 |
| 1.00E+16 | 0.35 | 0.2  | 8.00E+17 | 0.306 | 139.317 |
| 1.00E+16 | 0.35 | 0.2  | 9.00E+17 | 0.313 | 158.231 |
| 1.00E+16 | 0.35 | 0.2  | 1.00E+18 | 0.316 | 178.856 |
| 1.00E+16 | 0.35 | 0.25 | 3.00E+17 | 0.290 | 67.690  |
| 1.00E+16 | 0.35 | 0.25 | 4.00E+17 | 0.313 | 86.653  |
| 1.00E+16 | 0.35 | 0.25 | 5.00E+17 | 0.321 | 107.284 |
| 1.00E+16 | 0.35 | 0.25 | 6.00E+17 | 0.325 | 128.945 |
| 1.00E+16 | 0.35 | 0.25 | 7.00E+17 | 0.336 | 151.764 |
| 1.00E+16 | 0.35 | 0.25 | 8.00E+17 | 0.332 | 177.044 |
| 1.00E+16 | 0.35 | 0.25 | 9.00E+17 | 0.339 | 204.739 |
| 1.00E+16 | 0.35 | 0.25 | 1.00E+18 | 0.344 | 235.556 |
| 1.00E+16 | 0.35 | 0.3  | 3.00E+17 | 0.318 | 78.017  |
| 1.00E+16 | 0.35 | 0.3  | 4.00E+17 | 0.332 | 101.757 |
| 1.00E+16 | 0.35 | 0.3  | 5.00E+17 | 0.348 | 127.196 |
| 1.00E+16 | 0.35 | 0.3  | 6.00E+17 | 0.358 | 154.441 |
| 1.00E+16 | 0.35 | 0.3  | 7.00E+17 | 0.358 | 185.083 |
| 1.00E+16 | 0.35 | 0.3  | 8.00E+17 | 0.365 | 219.766 |
| 1.00E+16 | 0.35 | 0.3  | 9.00E+17 | 0.373 | 258.228 |
| 1.00E+16 | 0.35 | 0.3  | 1.00E+18 | 0.375 | 300.528 |
| 1.00E+16 | 0.35 | 0.35 | 3.00E+17 | 0.336 | 88.279  |

|          |      |      |          |       |         |
|----------|------|------|----------|-------|---------|
| 1.00E+16 | 0.35 | 0.35 | 4.00E+17 | 0.366 | 116.708 |
| 1.00E+16 | 0.35 | 0.35 | 5.00E+17 | 0.373 | 147.268 |
| 1.00E+16 | 0.35 | 0.35 | 6.00E+17 | 0.379 | 182.162 |
| 1.00E+16 | 0.35 | 0.35 | 7.00E+17 | 0.391 | 222.460 |
| 1.00E+16 | 0.35 | 0.35 | 8.00E+17 | 0.400 | 267.727 |
| 1.00E+16 | 0.35 | 0.35 | 9.00E+17 | 0.402 | 317.635 |
| 1.00E+16 | 0.35 | 0.35 | 1.00E+18 | 0.403 | 371.614 |
| 1.00E+16 | 0.35 | 0.4  | 3.00E+17 | 0.356 | 98.870  |
| 1.00E+16 | 0.35 | 0.4  | 4.00E+17 | 0.386 | 131.922 |
| 1.00E+16 | 0.35 | 0.4  | 5.00E+17 | 0.399 | 169.149 |
| 1.00E+16 | 0.35 | 0.4  | 6.00E+17 | 0.415 | 212.864 |
| 1.00E+16 | 0.35 | 0.4  | 7.00E+17 | 0.416 | 262.557 |
| 1.00E+16 | 0.35 | 0.4  | 8.00E+17 | 0.432 | 319.061 |
| 1.00E+16 | 0.35 | 0.4  | 9.00E+17 | 0.428 | 382.495 |
| 1.00E+16 | 0.35 | 0.4  | 1.00E+18 | 0.437 | 451.961 |
| 1.00E+16 | 0.4  | 0.15 | 3.00E+17 | 0.260 | 48.298  |
| 1.00E+16 | 0.4  | 0.15 | 4.00E+17 | 0.274 | 59.035  |
| 1.00E+16 | 0.4  | 0.15 | 5.00E+17 | 0.284 | 70.549  |
| 1.00E+16 | 0.4  | 0.15 | 6.00E+17 | 0.293 | 82.607  |
| 1.00E+16 | 0.4  | 0.15 | 7.00E+17 | 0.301 | 95.285  |
| 1.00E+16 | 0.4  | 0.15 | 8.00E+17 | 0.310 | 108.565 |
| 1.00E+16 | 0.4  | 0.15 | 9.00E+17 | 0.312 | 122.161 |
| 1.00E+16 | 0.4  | 0.15 | 1.00E+18 | 0.315 | 136.355 |
| 1.00E+16 | 0.4  | 0.2  | 3.00E+17 | 0.290 | 59.872  |
| 1.00E+16 | 0.4  | 0.2  | 4.00E+17 | 0.308 | 75.667  |
| 1.00E+16 | 0.4  | 0.2  | 5.00E+17 | 0.325 | 92.629  |
| 1.00E+16 | 0.4  | 0.2  | 6.00E+17 | 0.327 | 110.714 |
| 1.00E+16 | 0.4  | 0.2  | 7.00E+17 | 0.336 | 129.566 |
| 1.00E+16 | 0.4  | 0.2  | 8.00E+17 | 0.340 | 149.294 |
| 1.00E+16 | 0.4  | 0.2  | 9.00E+17 | 0.348 | 170.768 |
| 1.00E+16 | 0.4  | 0.2  | 1.00E+18 | 0.355 | 192.689 |
| 1.00E+16 | 0.4  | 0.25 | 3.00E+17 | 0.317 | 71.369  |
| 1.00E+16 | 0.4  | 0.25 | 4.00E+17 | 0.343 | 92.063  |
| 1.00E+16 | 0.4  | 0.25 | 5.00E+17 | 0.357 | 114.503 |
| 1.00E+16 | 0.4  | 0.25 | 6.00E+17 | 0.362 | 138.257 |
| 1.00E+16 | 0.4  | 0.25 | 7.00E+17 | 0.372 | 164.163 |
| 1.00E+16 | 0.4  | 0.25 | 8.00E+17 | 0.375 | 192.856 |
| 1.00E+16 | 0.4  | 0.25 | 9.00E+17 | 0.384 | 225.260 |
| 1.00E+16 | 0.4  | 0.25 | 1.00E+18 | 0.387 | 260.404 |
| 1.00E+16 | 0.4  | 0.3  | 3.00E+17 | 0.348 | 82.791  |
| 1.00E+16 | 0.4  | 0.3  | 4.00E+17 | 0.375 | 108.783 |
| 1.00E+16 | 0.4  | 0.3  | 5.00E+17 | 0.393 | 136.761 |
| 1.00E+16 | 0.4  | 0.3  | 6.00E+17 | 0.400 | 167.799 |
| 1.00E+16 | 0.4  | 0.3  | 7.00E+17 | 0.407 | 203.225 |
| 1.00E+16 | 0.4  | 0.3  | 8.00E+17 | 0.418 | 243.254 |
| 1.00E+16 | 0.4  | 0.3  | 9.00E+17 | 0.421 | 287.924 |
| 1.00E+16 | 0.4  | 0.3  | 1.00E+18 | 0.427 | 336.684 |
| 1.00E+16 | 0.4  | 0.35 | 3.00E+17 | 0.376 | 94.277  |
| 1.00E+16 | 0.4  | 0.35 | 4.00E+17 | 0.412 | 125.464 |
| 1.00E+16 | 0.4  | 0.35 | 5.00E+17 | 0.425 | 159.214 |
| 1.00E+16 | 0.4  | 0.35 | 6.00E+17 | 0.433 | 200.370 |
| 1.00E+16 | 0.4  | 0.35 | 7.00E+17 | 0.448 | 247.110 |
| 1.00E+16 | 0.4  | 0.35 | 8.00E+17 | 0.452 | 299.738 |
| 1.00E+16 | 0.4  | 0.35 | 9.00E+17 | 0.459 | 356.512 |
| 1.00E+16 | 0.4  | 0.35 | 1.00E+18 | 0.466 | 419.739 |
| 1.00E+16 | 0.4  | 0.4  | 3.00E+17 | 0.406 | 106.008 |
| 1.00E+16 | 0.4  | 0.4  | 4.00E+17 | 0.447 | 142.547 |
| 1.00E+16 | 0.4  | 0.4  | 5.00E+17 | 0.464 | 185.656 |

|          |      |      |          |       |         |
|----------|------|------|----------|-------|---------|
| 1.00E+16 | 0.4  | 0.4  | 6.00E+17 | 0.473 | 236.883 |
| 1.00E+16 | 0.4  | 0.4  | 7.00E+17 | 0.478 | 295.854 |
| 1.00E+16 | 0.4  | 0.4  | 8.00E+17 | 0.496 | 362.501 |
| 1.00E+16 | 0.4  | 0.4  | 9.00E+17 | 0.504 | 434.646 |
| 1.00E+16 | 0.4  | 0.4  | 1.00E+18 | 0.513 | 515.626 |
| 1.00E+16 | 0.45 | 0.15 | 3.00E+17 | 0.273 | 50.005  |
| 1.00E+16 | 0.45 | 0.15 | 4.00E+17 | 0.291 | 61.590  |
| 1.00E+16 | 0.45 | 0.15 | 5.00E+17 | 0.304 | 73.948  |
| 1.00E+16 | 0.45 | 0.15 | 6.00E+17 | 0.318 | 87.005  |
| 1.00E+16 | 0.45 | 0.15 | 7.00E+17 | 0.330 | 100.749 |
| 1.00E+16 | 0.45 | 0.15 | 8.00E+17 | 0.341 | 115.010 |
| 1.00E+16 | 0.45 | 0.15 | 9.00E+17 | 0.344 | 129.844 |
| 1.00E+16 | 0.45 | 0.15 | 1.00E+18 | 0.352 | 145.224 |
| 1.00E+16 | 0.45 | 0.2  | 3.00E+17 | 0.310 | 62.530  |
| 1.00E+16 | 0.45 | 0.2  | 4.00E+17 | 0.339 | 79.533  |
| 1.00E+16 | 0.45 | 0.2  | 5.00E+17 | 0.355 | 97.947  |
| 1.00E+16 | 0.45 | 0.2  | 6.00E+17 | 0.363 | 117.558 |
| 1.00E+16 | 0.45 | 0.2  | 7.00E+17 | 0.373 | 138.087 |
| 1.00E+16 | 0.45 | 0.2  | 8.00E+17 | 0.384 | 160.281 |
| 1.00E+16 | 0.45 | 0.2  | 9.00E+17 | 0.386 | 184.584 |
| 1.00E+16 | 0.45 | 0.2  | 1.00E+18 | 0.397 | 211.464 |
| 1.00E+16 | 0.45 | 0.25 | 3.00E+17 | 0.346 | 75.066  |
| 1.00E+16 | 0.45 | 0.25 | 4.00E+17 | 0.383 | 97.547  |
| 1.00E+16 | 0.45 | 0.25 | 5.00E+17 | 0.388 | 121.834 |
| 1.00E+16 | 0.45 | 0.25 | 6.00E+17 | 0.405 | 147.008 |
| 1.00E+16 | 0.45 | 0.25 | 7.00E+17 | 0.423 | 170.493 |
| 1.00E+16 | 0.45 | 0.25 | 8.00E+17 | 0.428 | 210.219 |
| 1.00E+16 | 0.45 | 0.25 | 9.00E+17 | 0.432 | 246.982 |
| 1.00E+16 | 0.45 | 0.25 | 1.00E+18 | 0.443 | 287.375 |
| 1.00E+16 | 0.45 | 0.3  | 3.00E+17 | 0.395 | 87.543  |
| 1.00E+16 | 0.45 | 0.3  | 4.00E+17 | 0.432 | 115.754 |
| 1.00E+16 | 0.45 | 0.3  | 5.00E+17 | 0.445 | 146.421 |
| 1.00E+16 | 0.45 | 0.3  | 6.00E+17 | 0.461 | 181.664 |
| 1.00E+16 | 0.45 | 0.3  | 7.00E+17 | 0.473 | 222.566 |
| 1.00E+16 | 0.45 | 0.3  | 8.00E+17 | 0.478 | 268.321 |
| 1.00E+16 | 0.45 | 0.3  | 9.00E+17 | 0.483 | 319.265 |
| 1.00E+16 | 0.45 | 0.3  | 1.00E+18 | 0.493 | 375.161 |
| 1.00E+16 | 0.45 | 0.35 | 3.00E+17 | 0.435 | 100.230 |
| 1.00E+16 | 0.45 | 0.35 | 4.00E+17 | 0.480 | 134.133 |
| 1.00E+16 | 0.45 | 0.35 | 5.00E+17 | 0.487 | 173.352 |
| 1.00E+16 | 0.45 | 0.35 | 6.00E+17 | 0.504 | 219.854 |
| 1.00E+16 | 0.45 | 0.35 | 7.00E+17 | 0.529 | 273.311 |
| 1.00E+16 | 0.45 | 0.35 | 8.00E+17 | 0.537 | 333.516 |
| 1.00E+16 | 0.45 | 0.35 | 9.00E+17 | 0.539 | 400.700 |
| 1.00E+16 | 0.45 | 0.35 | 1.00E+18 | 0.552 | 474.529 |
| 1.00E+16 | 0.45 | 0.4  | 3.00E+17 | 0.472 | 113.049 |
| 1.00E+16 | 0.45 | 0.4  | 4.00E+17 | 0.525 | 153.955 |
| 1.00E+16 | 0.45 | 0.4  | 5.00E+17 | 0.551 | 203.302 |
| 1.00E+16 | 0.45 | 0.4  | 6.00E+17 | 0.567 | 262.035 |
| 1.00E+16 | 0.45 | 0.4  | 7.00E+17 | 0.580 | 329.714 |
| 1.00E+16 | 0.45 | 0.4  | 8.00E+17 | 0.596 | 406.231 |
| 1.00E+16 | 0.45 | 0.4  | 9.00E+17 | 0.601 | 489.375 |
| 1.00E+16 | 0.45 | 0.4  | 1.00E+18 | 0.607 | 584.051 |
| 1.00E+16 | 0.5  | 0.15 | 3.00E+17 | 0.288 | 92.730  |
| 1.00E+16 | 0.5  | 0.15 | 4.00E+17 | 0.308 | 110.016 |
| 1.00E+16 | 0.5  | 0.15 | 5.00E+17 | 0.327 | 127.983 |
| 1.00E+16 | 0.5  | 0.15 | 6.00E+17 | 0.349 | 148.350 |
| 1.00E+16 | 0.5  | 0.15 | 7.00E+17 | 0.364 | 168.375 |

|          |     |      |          |       |         |
|----------|-----|------|----------|-------|---------|
| 1.00E+16 | 0.5 | 0.15 | 8.00E+17 | 0.379 | 190.025 |
| 1.00E+16 | 0.5 | 0.15 | 9.00E+17 | 0.378 | 135.423 |
| 1.00E+16 | 0.5 | 0.15 | 1.00E+18 | 0.392 | 140.280 |
| 1.00E+16 | 0.5 | 0.2  | 3.00E+17 | 0.332 | 112.529 |
| 1.00E+16 | 0.5 | 0.2  | 4.00E+17 | 0.375 | 138.435 |
| 1.00E+16 | 0.5 | 0.2  | 5.00E+17 | 0.394 | 163.324 |
| 1.00E+16 | 0.5 | 0.2  | 6.00E+17 | 0.410 | 187.679 |
| 1.00E+16 | 0.5 | 0.2  | 7.00E+17 | 0.415 | 228.258 |
| 1.00E+16 | 0.5 | 0.2  | 8.00E+17 | 0.433 | 264.722 |
| 1.00E+16 | 0.5 | 0.2  | 9.00E+17 | 0.432 | 304.448 |
| 1.00E+16 | 0.5 | 0.2  | 1.00E+18 | 0.447 | 347.158 |
| 1.00E+16 | 0.5 | 0.25 | 3.00E+17 | 0.385 | 131.872 |
| 1.00E+16 | 0.5 | 0.25 | 4.00E+17 | 0.433 | 166.361 |
| 1.00E+16 | 0.5 | 0.25 | 5.00E+17 | 0.453 | 204.955 |
| 1.00E+16 | 0.5 | 0.25 | 6.00E+17 | 0.465 | 248.714 |
| 1.00E+16 | 0.5 | 0.25 | 7.00E+17 | 0.485 | 265.216 |
| 1.00E+16 | 0.5 | 0.25 | 8.00E+17 | 0.491 | 290.404 |
| 1.00E+16 | 0.5 | 0.25 | 9.00E+17 | 0.511 | 316.601 |
| 1.00E+16 | 0.5 | 0.25 | 1.00E+18 | 0.516 | 469.824 |
| 1.00E+16 | 0.5 | 0.3  | 3.00E+17 | 0.447 | 152.807 |
| 1.00E+16 | 0.5 | 0.3  | 4.00E+17 | 0.480 | 196.752 |
| 1.00E+16 | 0.5 | 0.3  | 5.00E+17 | 0.510 | 179.639 |
| 1.00E+16 | 0.5 | 0.3  | 6.00E+17 | 0.535 | 308.439 |
| 1.00E+16 | 0.5 | 0.3  | 7.00E+17 | 0.549 | 375.234 |
| 1.00E+16 | 0.5 | 0.3  | 8.00E+17 | 0.563 | 445.053 |
| 1.00E+16 | 0.5 | 0.3  | 9.00E+17 | 0.564 | 529.896 |
| 1.00E+16 | 0.5 | 0.35 | 3.00E+17 | 0.501 | 173.472 |
| 1.00E+16 | 0.5 | 0.35 | 4.00E+17 | 0.527 | 229.923 |
| 1.00E+16 | 0.5 | 0.35 | 5.00E+17 | 0.573 | 296.952 |
| 1.00E+16 | 0.5 | 0.35 | 6.00E+17 | 0.607 | 373.723 |
| 1.00E+16 | 0.5 | 0.35 | 7.00E+17 | 0.613 | 301.931 |
| 1.00E+16 | 0.5 | 0.35 | 8.00E+17 | 0.637 | 556.767 |
| 1.00E+16 | 0.5 | 0.35 | 9.00E+17 | 0.646 | 657.757 |
| 1.00E+16 | 0.5 | 0.35 | 1.00E+18 | 0.663 | 756.887 |
| 1.00E+16 | 0.5 | 0.4  | 3.00E+17 | 0.560 | 189.528 |
| 1.00E+16 | 0.5 | 0.4  | 4.00E+17 | 0.619 | 262.364 |
| 1.00E+16 | 0.5 | 0.4  | 5.00E+17 | 0.656 | 345.514 |
| 1.00E+16 | 0.5 | 0.4  | 6.00E+17 | 0.668 | 440.988 |
| 1.00E+16 | 0.5 | 0.4  | 7.00E+17 | 0.689 | 549.293 |
| 1.00E+16 | 0.5 | 0.4  | 8.00E+17 | 0.720 | 416.535 |
| 1.00E+16 | 0.5 | 0.4  | 9.00E+17 | 0.731 | 782.218 |
| 1.00E+16 | 0.5 | 0.4  | 1.00E+18 | 0.736 | 890.114 |
| 1.00E+16 | 0.6 | 0.15 | 3.00E+17 | 0.325 | 95.596  |
| 1.00E+16 | 0.6 | 0.15 | 4.00E+17 | 0.352 | 111.881 |
| 1.00E+16 | 0.6 | 0.15 | 5.00E+17 | 0.387 | 123.078 |
| 1.00E+16 | 0.6 | 0.15 | 6.00E+17 | 0.425 | 134.953 |
| 1.00E+16 | 0.6 | 0.15 | 7.00E+17 | 0.452 | 141.704 |
| 1.00E+16 | 0.6 | 0.15 | 8.00E+17 | 0.476 | 151.135 |
| 1.00E+16 | 0.6 | 0.15 | 9.00E+17 | 0.479 | 228.135 |
| 1.00E+16 | 0.6 | 0.15 | 1.00E+18 | 0.502 | 257.921 |
| 1.00E+16 | 0.6 | 0.2  | 3.00E+17 | 0.395 | 117.507 |
| 1.00E+16 | 0.6 | 0.2  | 4.00E+17 | 0.459 | 144.883 |
| 1.00E+16 | 0.6 | 0.2  | 5.00E+17 | 0.498 | 174.942 |
| 1.00E+16 | 0.6 | 0.2  | 6.00E+17 | 0.523 | 208.762 |
| 1.00E+16 | 0.6 | 0.2  | 7.00E+17 | 0.552 | 246.490 |
| 1.00E+16 | 0.6 | 0.2  | 8.00E+17 | 0.564 | 288.218 |
| 1.00E+16 | 0.6 | 0.2  | 9.00E+17 | 0.579 | 333.524 |
| 1.00E+16 | 0.6 | 0.2  | 1.00E+18 | 0.595 | 382.624 |

|          |     |      |          |       |         |
|----------|-----|------|----------|-------|---------|
| 1.00E+16 | 0.6 | 0.25 | 3.00E+17 | 0.495 | 139.782 |
| 1.00E+16 | 0.6 | 0.25 | 4.00E+17 | 0.569 | 177.207 |
| 1.00E+16 | 0.6 | 0.25 | 5.00E+17 | 0.602 | 198.827 |
| 1.00E+16 | 0.6 | 0.25 | 6.00E+17 | 0.630 | 271.084 |
| 1.00E+16 | 0.6 | 0.25 | 7.00E+17 | 0.654 | 323.673 |
| 1.00E+16 | 0.6 | 0.25 | 8.00E+17 | 0.673 | 389.274 |
| 1.00E+16 | 0.6 | 0.25 | 9.00E+17 | 0.700 | 453.129 |
| 1.00E+16 | 0.6 | 0.25 | 1.00E+18 | 0.715 | 526.737 |
| 1.00E+16 | 0.6 | 0.3  | 3.00E+17 | 0.595 | 162.455 |
| 1.00E+16 | 0.6 | 0.3  | 4.00E+17 | 0.666 | 212.951 |
| 1.00E+16 | 0.6 | 0.3  | 5.00E+17 | 0.705 | 269.575 |
| 1.00E+16 | 0.6 | 0.3  | 6.00E+17 | 0.721 | 341.292 |
| 1.00E+16 | 0.6 | 0.3  | 7.00E+17 | 0.783 | 240.094 |
| 1.00E+16 | 0.6 | 0.3  | 8.00E+17 | 0.810 | 502.814 |
| 1.00E+16 | 0.6 | 0.3  | 9.00E+17 | 0.828 | 598.123 |
| 1.00E+16 | 0.6 | 0.3  | 1.00E+18 | 0.837 | 693.245 |
| 1.00E+16 | 0.6 | 0.35 | 3.00E+17 | 0.680 | 186.191 |
| 1.00E+16 | 0.6 | 0.35 | 4.00E+17 | 0.777 | 251.582 |
| 1.00E+16 | 0.6 | 0.35 | 5.00E+17 | 0.848 | 329.334 |
| 1.00E+16 | 0.6 | 0.35 | 6.00E+17 | 0.882 | 418.832 |
| 1.00E+16 | 0.6 | 0.35 | 7.00E+17 | 0.909 | 518.389 |
| 1.00E+16 | 0.6 | 0.35 | 8.00E+17 | 0.943 | 631.046 |
| 1.00E+16 | 0.6 | 0.35 | 9.00E+17 | 0.960 | 741.413 |
| 1.00E+16 | 0.6 | 0.35 | 1.00E+18 | 0.989 | 848.411 |
| 1.00E+16 | 0.6 | 0.4  | 3.00E+17 | 0.812 | 212.572 |
| 1.00E+16 | 0.6 | 0.4  | 4.00E+17 | 0.900 | 294.188 |
| 1.00E+16 | 0.6 | 0.4  | 5.00E+17 | 1.008 | 388.064 |
| 1.00E+16 | 0.6 | 0.4  | 6.00E+17 | 1.027 | 411.435 |
| 1.00E+16 | 0.6 | 0.4  | 7.00E+17 | 1.062 | 630.552 |
| 1.00E+16 | 0.6 | 0.4  | 8.00E+17 | 1.098 | 756.772 |
| 1.00E+16 | 0.6 | 0.4  | 9.00E+17 | 1.138 | 878.753 |
| 1.00E+16 | 0.6 | 0.4  | 1.00E+18 | 1.161 | 993.067 |
| 9.00E+15 | 0.2 | 0.15 | 3.00E+17 | 0.547 | 68.486  |
| 9.00E+15 | 0.2 | 0.15 | 4.00E+17 | 0.571 | 80.273  |
| 9.00E+15 | 0.2 | 0.15 | 5.00E+17 | 0.584 | 93.327  |
| 9.00E+15 | 0.2 | 0.15 | 6.00E+17 | 0.599 | 108.019 |
| 9.00E+15 | 0.2 | 0.15 | 7.00E+17 | 0.609 | 123.968 |
| 9.00E+15 | 0.2 | 0.15 | 8.00E+17 | 0.614 | 141.218 |
| 9.00E+15 | 0.2 | 0.15 | 9.00E+17 | 0.617 | 159.951 |
| 9.00E+15 | 0.2 | 0.15 | 1.00E+18 | 0.620 | 179.838 |
| 9.00E+15 | 0.2 | 0.2  | 3.00E+17 | 0.596 | 80.203  |
| 9.00E+15 | 0.2 | 0.2  | 4.00E+17 | 0.615 | 98.240  |
| 9.00E+15 | 0.2 | 0.2  | 5.00E+17 | 0.636 | 118.716 |
| 9.00E+15 | 0.2 | 0.2  | 6.00E+17 | 0.641 | 141.593 |
| 9.00E+15 | 0.2 | 0.2  | 7.00E+17 | 0.651 | 167.545 |
| 9.00E+15 | 0.2 | 0.2  | 8.00E+17 | 0.659 | 195.480 |
| 9.00E+15 | 0.2 | 0.2  | 9.00E+17 | 0.667 | 225.722 |
| 9.00E+15 | 0.2 | 0.2  | 1.00E+18 | 0.666 | 258.044 |
| 9.00E+15 | 0.2 | 0.25 | 3.00E+17 | 0.637 | 92.850  |
| 9.00E+15 | 0.2 | 0.25 | 4.00E+17 | 0.663 | 117.952 |
| 9.00E+15 | 0.2 | 0.25 | 5.00E+17 | 0.681 | 147.008 |
| 9.00E+15 | 0.2 | 0.25 | 6.00E+17 | 0.693 | 179.881 |
| 9.00E+15 | 0.2 | 0.25 | 7.00E+17 | 0.702 | 216.327 |
| 9.00E+15 | 0.2 | 0.25 | 8.00E+17 | 0.709 | 256.036 |
| 9.00E+15 | 0.2 | 0.25 | 9.00E+17 | 0.716 | 297.271 |
| 9.00E+15 | 0.2 | 0.25 | 1.00E+18 | 0.719 | 338.464 |
| 9.00E+15 | 0.2 | 0.3  | 3.00E+17 | 0.678 | 106.369 |
| 9.00E+15 | 0.2 | 0.3  | 4.00E+17 | 0.714 | 139.248 |

|          |      |      |          |       |         |
|----------|------|------|----------|-------|---------|
| 9.00E+15 | 0.2  | 0.3  | 5.00E+17 | 0.737 | 177.532 |
| 9.00E+15 | 0.2  | 0.3  | 6.00E+17 | 0.747 | 221.040 |
| 9.00E+15 | 0.2  | 0.3  | 7.00E+17 | 0.763 | 268.933 |
| 9.00E+15 | 0.2  | 0.3  | 8.00E+17 | 0.769 | 317.649 |
| 9.00E+15 | 0.2  | 0.3  | 9.00E+17 | 0.777 | 366.592 |
| 9.00E+15 | 0.2  | 0.3  | 1.00E+18 | 0.784 | 415.397 |
| 9.00E+15 | 0.2  | 0.35 | 3.00E+17 | 0.722 | 120.509 |
| 9.00E+15 | 0.2  | 0.35 | 4.00E+17 | 0.769 | 161.695 |
| 9.00E+15 | 0.2  | 0.35 | 5.00E+17 | 0.794 | 209.940 |
| 9.00E+15 | 0.2  | 0.35 | 6.00E+17 | 0.806 | 264.377 |
| 9.00E+15 | 0.2  | 0.35 | 7.00E+17 | 0.822 | 320.760 |
| 9.00E+15 | 0.2  | 0.35 | 8.00E+17 | 0.835 | 376.930 |
| 9.00E+15 | 0.2  | 0.35 | 9.00E+17 | 0.845 | 433.133 |
| 9.00E+15 | 0.2  | 0.35 | 1.00E+18 | 0.853 | 489.405 |
| 9.00E+15 | 0.2  | 0.4  | 3.00E+17 | 0.774 | 135.276 |
| 9.00E+15 | 0.2  | 0.4  | 4.00E+17 | 0.830 | 185.479 |
| 9.00E+15 | 0.2  | 0.4  | 5.00E+17 | 0.858 | 244.569 |
| 9.00E+15 | 0.2  | 0.4  | 6.00E+17 | 0.875 | 307.875 |
| 9.00E+15 | 0.2  | 0.4  | 7.00E+17 | 0.888 | 371.330 |
| 9.00E+15 | 0.2  | 0.4  | 8.00E+17 | 0.906 | 434.941 |
| 9.00E+15 | 0.2  | 0.4  | 9.00E+17 | 0.915 | 498.300 |
| 9.00E+15 | 0.2  | 0.4  | 1.00E+18 | 0.930 | 561.655 |
| 9.00E+15 | 0.25 | 0.15 | 3.00E+17 | 0.568 | 58.116  |
| 9.00E+15 | 0.25 | 0.15 | 4.00E+17 | 0.592 | 69.580  |
| 9.00E+15 | 0.25 | 0.15 | 5.00E+17 | 0.610 | 82.239  |
| 9.00E+15 | 0.25 | 0.15 | 6.00E+17 | 0.626 | 96.558  |
| 9.00E+15 | 0.25 | 0.15 | 7.00E+17 | 0.641 | 112.377 |
| 9.00E+15 | 0.25 | 0.15 | 8.00E+17 | 0.647 | 129.772 |
| 9.00E+15 | 0.25 | 0.15 | 9.00E+17 | 0.656 | 148.666 |
| 9.00E+15 | 0.25 | 0.15 | 1.00E+18 | 0.661 | 168.973 |
| 9.00E+15 | 0.25 | 0.2  | 3.00E+17 | 0.623 | 70.220  |
| 9.00E+15 | 0.25 | 0.2  | 4.00E+17 | 0.661 | 88.080  |
| 9.00E+15 | 0.25 | 0.2  | 5.00E+17 | 0.673 | 109.126 |
| 9.00E+15 | 0.25 | 0.2  | 6.00E+17 | 0.686 | 133.015 |
| 9.00E+15 | 0.25 | 0.2  | 7.00E+17 | 0.702 | 159.723 |
| 9.00E+15 | 0.25 | 0.2  | 8.00E+17 | 0.713 | 189.178 |
| 9.00E+15 | 0.25 | 0.2  | 9.00E+17 | 0.717 | 221.396 |
| 9.00E+15 | 0.25 | 0.2  | 1.00E+18 | 0.716 | 255.979 |
| 9.00E+15 | 0.25 | 0.25 | 3.00E+17 | 0.681 | 82.508  |
| 9.00E+15 | 0.25 | 0.25 | 4.00E+17 | 0.719 | 107.910 |
| 9.00E+15 | 0.25 | 0.25 | 5.00E+17 | 0.735 | 137.720 |
| 9.00E+15 | 0.25 | 0.25 | 6.00E+17 | 0.754 | 171.962 |
| 9.00E+15 | 0.25 | 0.25 | 7.00E+17 | 0.767 | 210.508 |
| 9.00E+15 | 0.25 | 0.25 | 8.00E+17 | 0.780 | 243.141 |
| 9.00E+15 | 0.25 | 0.25 | 9.00E+17 | 0.780 | 270.123 |
| 9.00E+15 | 0.25 | 0.25 | 1.00E+18 | 0.785 | 340.734 |
| 9.00E+15 | 0.25 | 0.3  | 3.00E+17 | 0.734 | 95.914  |
| 9.00E+15 | 0.25 | 0.3  | 4.00E+17 | 0.783 | 129.468 |
| 9.00E+15 | 0.25 | 0.3  | 5.00E+17 | 0.801 | 169.253 |
| 9.00E+15 | 0.25 | 0.3  | 6.00E+17 | 0.818 | 215.036 |
| 9.00E+15 | 0.25 | 0.3  | 7.00E+17 | 0.839 | 265.953 |
| 9.00E+15 | 0.25 | 0.3  | 8.00E+17 | 0.833 | 318.115 |
| 9.00E+15 | 0.25 | 0.3  | 9.00E+17 | 0.852 | 370.246 |
| 9.00E+15 | 0.25 | 0.3  | 1.00E+18 | 0.854 | 422.421 |
| 9.00E+15 | 0.25 | 0.35 | 3.00E+17 | 0.793 | 110.153 |
| 9.00E+15 | 0.25 | 0.35 | 4.00E+17 | 0.843 | 152.761 |
| 9.00E+15 | 0.25 | 0.35 | 5.00E+17 | 0.871 | 203.592 |
| 9.00E+15 | 0.25 | 0.35 | 6.00E+17 | 0.889 | 261.465 |

|          |      |      |          |       |         |
|----------|------|------|----------|-------|---------|
| 9.00E+15 | 0.25 | 0.35 | 7.00E+17 | 0.906 | 321.498 |
| 9.00E+15 | 0.25 | 0.35 | 8.00E+17 | 0.923 | 381.600 |
| 9.00E+15 | 0.25 | 0.35 | 9.00E+17 | 0.931 | 441.562 |
| 9.00E+15 | 0.25 | 0.35 | 1.00E+18 | 0.944 | 501.530 |
| 9.00E+15 | 0.25 | 0.4  | 3.00E+17 | 0.854 | 125.556 |
| 9.00E+15 | 0.25 | 0.4  | 4.00E+17 | 0.920 | 177.881 |
| 9.00E+15 | 0.25 | 0.4  | 5.00E+17 | 0.941 | 240.513 |
| 9.00E+15 | 0.25 | 0.4  | 6.00E+17 | 0.974 | 307.722 |
| 9.00E+15 | 0.25 | 0.4  | 7.00E+17 | 0.993 | 375.826 |
| 9.00E+15 | 0.25 | 0.4  | 8.00E+17 | 1.010 | 443.492 |
| 9.00E+15 | 0.25 | 0.4  | 9.00E+17 | 1.023 | 511.153 |
| 9.00E+15 | 0.25 | 0.4  | 1.00E+18 | 1.027 | 578.747 |
| 9.00E+15 | 0.3  | 0.15 | 3.00E+17 | 0.587 | 61.767  |
| 9.00E+15 | 0.3  | 0.15 | 4.00E+17 | 0.615 | 74.928  |
| 9.00E+15 | 0.3  | 0.15 | 5.00E+17 | 0.644 | 89.962  |
| 9.00E+15 | 0.3  | 0.15 | 6.00E+17 | 0.669 | 107.098 |
| 9.00E+15 | 0.3  | 0.15 | 7.00E+17 | 0.686 | 126.157 |
| 9.00E+15 | 0.3  | 0.15 | 8.00E+17 | 0.691 | 146.992 |
| 9.00E+15 | 0.3  | 0.15 | 9.00E+17 | 0.699 | 169.716 |
| 9.00E+15 | 0.3  | 0.15 | 1.00E+18 | 0.703 | 194.329 |
| 9.00E+15 | 0.3  | 0.2  | 3.00E+17 | 0.651 | 75.590  |
| 9.00E+15 | 0.3  | 0.2  | 4.00E+17 | 0.700 | 96.894  |
| 9.00E+15 | 0.3  | 0.2  | 5.00E+17 | 0.720 | 121.980 |
| 9.00E+15 | 0.3  | 0.2  | 6.00E+17 | 0.749 | 152.970 |
| 9.00E+15 | 0.3  | 0.2  | 7.00E+17 | 0.758 | 182.464 |
| 9.00E+15 | 0.3  | 0.2  | 8.00E+17 | 0.765 | 217.885 |
| 9.00E+15 | 0.3  | 0.2  | 9.00E+17 | 0.772 | 256.333 |
| 9.00E+15 | 0.3  | 0.2  | 1.00E+18 | 0.782 | 299.785 |
| 9.00E+15 | 0.3  | 0.25 | 3.00E+17 | 0.725 | 90.377  |
| 9.00E+15 | 0.3  | 0.25 | 4.00E+17 | 0.780 | 120.775 |
| 9.00E+15 | 0.3  | 0.25 | 5.00E+17 | 0.805 | 156.481 |
| 9.00E+15 | 0.3  | 0.25 | 6.00E+17 | 0.825 | 197.726 |
| 9.00E+15 | 0.3  | 0.25 | 7.00E+17 | 0.836 | 247.610 |
| 9.00E+15 | 0.3  | 0.25 | 8.00E+17 | 0.846 | 292.697 |
| 9.00E+15 | 0.3  | 0.25 | 9.00E+17 | 0.854 | 345.956 |
| 9.00E+15 | 0.3  | 0.25 | 1.00E+18 | 0.869 | 395.159 |
| 9.00E+15 | 0.3  | 0.3  | 3.00E+17 | 0.801 | 108.612 |
| 9.00E+15 | 0.3  | 0.3  | 4.00E+17 | 0.862 | 149.681 |
| 9.00E+15 | 0.3  | 0.3  | 5.00E+17 | 0.887 | 198.301 |
| 9.00E+15 | 0.3  | 0.3  | 6.00E+17 | 0.910 | 250.269 |
| 9.00E+15 | 0.3  | 0.3  | 7.00E+17 | 0.925 | 312.508 |
| 9.00E+15 | 0.3  | 0.3  | 8.00E+17 | 0.936 | 366.611 |
| 9.00E+15 | 0.3  | 0.3  | 9.00E+17 | 0.945 | 424.653 |
| 9.00E+15 | 0.3  | 0.3  | 1.00E+18 | 0.960 | 487.765 |
| 9.00E+15 | 0.3  | 0.35 | 3.00E+17 | 0.883 | 124.260 |
| 9.00E+15 | 0.3  | 0.35 | 4.00E+17 | 0.951 | 175.761 |
| 9.00E+15 | 0.3  | 0.35 | 5.00E+17 | 0.978 | 237.417 |
| 9.00E+15 | 0.3  | 0.35 | 6.00E+17 | 1.000 | 308.314 |
| 9.00E+15 | 0.3  | 0.35 | 7.00E+17 | 1.018 | 371.318 |
| 9.00E+15 | 0.3  | 0.35 | 8.00E+17 | 1.034 | 443.224 |
| 9.00E+15 | 0.3  | 0.35 | 9.00E+17 | 1.048 | 505.634 |
| 9.00E+15 | 0.3  | 0.35 | 1.00E+18 | 1.058 | 577.933 |
| 9.00E+15 | 0.3  | 0.4  | 3.00E+17 | 0.968 | 143.117 |
| 9.00E+15 | 0.3  | 0.4  | 4.00E+17 | 1.047 | 210.221 |
| 9.00E+15 | 0.3  | 0.4  | 5.00E+17 | 1.079 | 285.215 |
| 9.00E+15 | 0.3  | 0.4  | 6.00E+17 | 1.101 | 361.419 |
| 9.00E+15 | 0.3  | 0.4  | 7.00E+17 | 1.120 | 432.861 |
| 9.00E+15 | 0.3  | 0.4  | 8.00E+17 | 1.135 | 513.755 |



|          |      |      |          |       |         |
|----------|------|------|----------|-------|---------|
| 9.00E+15 | 0.3  | 0.4  | 9.00E+17 | 1.160 | 584.491 |
| 9.00E+15 | 0.3  | 0.4  | 1.00E+18 | 1.175 | 665.680 |
| 9.00E+15 | 0.35 | 0.15 | 3.00E+17 | 0.605 | 66.053  |
| 9.00E+15 | 0.35 | 0.15 | 4.00E+17 | 0.640 | 81.233  |
| 9.00E+15 | 0.35 | 0.15 | 5.00E+17 | 0.681 | 98.960  |
| 9.00E+15 | 0.35 | 0.15 | 6.00E+17 | 0.719 | 119.005 |
| 9.00E+15 | 0.35 | 0.15 | 7.00E+17 | 0.735 | 141.241 |
| 9.00E+15 | 0.35 | 0.15 | 8.00E+17 | 0.746 | 165.872 |
| 9.00E+15 | 0.35 | 0.15 | 9.00E+17 | 0.755 | 192.634 |
| 9.00E+15 | 0.35 | 0.15 | 1.00E+18 | 0.760 | 221.492 |
| 9.00E+15 | 0.35 | 0.2  | 3.00E+17 | 0.688 | 82.245  |
| 9.00E+15 | 0.35 | 0.2  | 4.00E+17 | 0.758 | 107.343 |
| 9.00E+15 | 0.35 | 0.2  | 5.00E+17 | 0.780 | 136.787 |
| 9.00E+15 | 0.35 | 0.2  | 6.00E+17 | 0.807 | 170.545 |
| 9.00E+15 | 0.35 | 0.2  | 7.00E+17 | 0.821 | 208.432 |
| 9.00E+15 | 0.35 | 0.2  | 8.00E+17 | 0.832 | 250.101 |
| 9.00E+15 | 0.35 | 0.2  | 9.00E+17 | 0.843 | 293.480 |
| 9.00E+15 | 0.35 | 0.2  | 1.00E+18 | 0.852 | 336.929 |
| 9.00E+15 | 0.35 | 0.25 | 3.00E+17 | 0.797 | 100.111 |
| 9.00E+15 | 0.35 | 0.25 | 4.00E+17 | 0.844 | 135.921 |
| 9.00E+15 | 0.35 | 0.25 | 5.00E+17 | 0.876 | 178.389 |
| 9.00E+15 | 0.35 | 0.25 | 6.00E+17 | 0.898 | 227.334 |
| 9.00E+15 | 0.35 | 0.25 | 7.00E+17 | 0.911 | 280.705 |
| 9.00E+15 | 0.35 | 0.25 | 8.00E+17 | 0.925 | 334.558 |
| 9.00E+15 | 0.35 | 0.25 | 9.00E+17 | 0.946 | 388.468 |
| 9.00E+15 | 0.35 | 0.25 | 1.00E+18 | 0.959 | 442.493 |
| 9.00E+15 | 0.35 | 0.3  | 3.00E+17 | 0.881 | 119.698 |
| 9.00E+15 | 0.35 | 0.3  | 4.00E+17 | 0.949 | 167.711 |
| 9.00E+15 | 0.35 | 0.3  | 5.00E+17 | 0.983 | 225.074 |
| 9.00E+15 | 0.35 | 0.3  | 6.00E+17 | 0.987 | 288.658 |
| 9.00E+15 | 0.35 | 0.3  | 7.00E+17 | 1.009 | 352.755 |
| 9.00E+15 | 0.35 | 0.3  | 8.00E+17 | 1.038 | 416.919 |
| 9.00E+15 | 0.35 | 0.3  | 9.00E+17 | 1.052 | 480.992 |
| 9.00E+15 | 0.35 | 0.3  | 1.00E+18 | 1.065 | 545.188 |
| 9.00E+15 | 0.35 | 0.35 | 3.00E+17 | 0.983 | 140.877 |
| 9.00E+15 | 0.35 | 0.35 | 4.00E+17 | 1.053 | 202.554 |
| 9.00E+15 | 0.35 | 0.35 | 5.00E+17 | 1.094 | 274.796 |
| 9.00E+15 | 0.35 | 0.35 | 6.00E+17 | 1.117 | 348.813 |
| 9.00E+15 | 0.35 | 0.35 | 7.00E+17 | 1.134 | 422.635 |
| 9.00E+15 | 0.35 | 0.35 | 8.00E+17 | 1.160 | 496.754 |
| 9.00E+15 | 0.35 | 0.35 | 9.00E+17 | 1.174 | 570.865 |
| 9.00E+15 | 0.35 | 0.35 | 1.00E+18 | 1.188 | 644.751 |
| 9.00E+15 | 0.35 | 0.4  | 3.00E+17 | 1.090 | 163.849 |
| 9.00E+15 | 0.35 | 0.4  | 4.00E+17 | 1.150 | 240.174 |
| 9.00E+15 | 0.35 | 0.4  | 5.00E+17 | 1.208 | 323.860 |
| 9.00E+15 | 0.35 | 0.4  | 6.00E+17 | 1.239 | 407.737 |
| 9.00E+15 | 0.35 | 0.4  | 7.00E+17 | 1.272 | 491.533 |
| 9.00E+15 | 0.35 | 0.4  | 8.00E+17 | 1.294 | 575.263 |
| 9.00E+15 | 0.35 | 0.4  | 9.00E+17 | 1.320 | 658.979 |
| 9.00E+15 | 0.35 | 0.4  | 1.00E+18 | 1.342 | 742.260 |
| 9.00E+15 | 0.4  | 0.15 | 3.00E+17 | 0.626 | 68.933  |
| 9.00E+15 | 0.4  | 0.15 | 4.00E+17 | 0.669 | 85.929  |
| 9.00E+15 | 0.4  | 0.15 | 5.00E+17 | 0.728 | 105.926 |
| 9.00E+15 | 0.4  | 0.15 | 6.00E+17 | 0.769 | 128.617 |
| 9.00E+15 | 0.4  | 0.15 | 7.00E+17 | 0.790 | 153.951 |
| 9.00E+15 | 0.4  | 0.15 | 8.00E+17 | 0.801 | 181.835 |
| 9.00E+15 | 0.4  | 0.15 | 9.00E+17 | 0.808 | 212.392 |
| 9.00E+15 | 0.4  | 0.15 | 1.00E+18 | 0.825 | 244.788 |

|          |      |      |          |       |         |
|----------|------|------|----------|-------|---------|
| 9.00E+15 | 0.4  | 0.2  | 3.00E+17 | 0.734 | 87.164  |
| 9.00E+15 | 0.4  | 0.2  | 4.00E+17 | 0.816 | 115.484 |
| 9.00E+15 | 0.4  | 0.2  | 5.00E+17 | 0.856 | 148.790 |
| 9.00E+15 | 0.4  | 0.2  | 6.00E+17 | 0.878 | 187.095 |
| 9.00E+15 | 0.4  | 0.2  | 7.00E+17 | 0.901 | 230.238 |
| 9.00E+15 | 0.4  | 0.2  | 8.00E+17 | 0.913 | 276.575 |
| 9.00E+15 | 0.4  | 0.2  | 9.00E+17 | 0.925 | 323.272 |
| 9.00E+15 | 0.4  | 0.2  | 1.00E+18 | 0.943 | 369.961 |
| 9.00E+15 | 0.4  | 0.25 | 3.00E+17 | 0.866 | 107.508 |
| 9.00E+15 | 0.4  | 0.25 | 4.00E+17 | 0.937 | 148.275 |
| 9.00E+15 | 0.4  | 0.25 | 5.00E+17 | 0.970 | 196.804 |
| 9.00E+15 | 0.4  | 0.25 | 6.00E+17 | 0.989 | 252.222 |
| 9.00E+15 | 0.4  | 0.25 | 7.00E+17 | 1.012 | 310.404 |
| 9.00E+15 | 0.4  | 0.25 | 8.00E+17 | 1.029 | 368.583 |
| 9.00E+15 | 0.4  | 0.25 | 9.00E+17 | 1.050 | 426.761 |
| 9.00E+15 | 0.4  | 0.25 | 1.00E+18 | 1.068 | 484.880 |
| 9.00E+15 | 0.4  | 0.3  | 3.00E+17 | 0.986 | 130.024 |
| 9.00E+15 | 0.4  | 0.3  | 4.00E+17 | 1.051 | 184.993 |
| 9.00E+15 | 0.4  | 0.3  | 5.00E+17 | 1.092 | 250.322 |
| 9.00E+15 | 0.4  | 0.3  | 6.00E+17 | 1.116 | 319.621 |
| 9.00E+15 | 0.4  | 0.3  | 7.00E+17 | 1.142 | 358.271 |
| 9.00E+15 | 0.4  | 0.3  | 8.00E+17 | 1.162 | 458.112 |
| 9.00E+15 | 0.4  | 0.3  | 9.00E+17 | 1.172 | 527.532 |
| 9.00E+15 | 0.4  | 0.3  | 1.00E+18 | 1.189 | 596.727 |
| 9.00E+15 | 0.4  | 0.35 | 3.00E+17 | 1.095 | 154.750 |
| 9.00E+15 | 0.4  | 0.35 | 4.00E+17 | 1.172 | 225.528 |
| 9.00E+15 | 0.4  | 0.35 | 5.00E+17 | 1.215 | 305.252 |
| 9.00E+15 | 0.4  | 0.35 | 6.00E+17 | 1.242 | 385.423 |
| 9.00E+15 | 0.4  | 0.35 | 7.00E+17 | 1.275 | 465.648 |
| 9.00E+15 | 0.4  | 0.35 | 8.00E+17 | 1.295 | 545.847 |
| 9.00E+15 | 0.4  | 0.35 | 9.00E+17 | 1.321 | 625.906 |
| 9.00E+15 | 0.4  | 0.35 | 1.00E+18 | 1.336 | 705.753 |
| 9.00E+15 | 0.4  | 0.4  | 3.00E+17 | 1.226 | 181.572 |
| 9.00E+15 | 0.4  | 0.4  | 4.00E+17 | 1.314 | 268.426 |
| 9.00E+15 | 0.4  | 0.4  | 5.00E+17 | 1.366 | 359.196 |
| 9.00E+15 | 0.4  | 0.4  | 6.00E+17 | 1.408 | 450.143 |
| 9.00E+15 | 0.4  | 0.4  | 7.00E+17 | 1.438 | 540.943 |
| 9.00E+15 | 0.4  | 0.4  | 8.00E+17 | 1.472 | 631.851 |
| 9.00E+15 | 0.4  | 0.4  | 9.00E+17 | 1.496 | 722.111 |
| 9.00E+15 | 0.4  | 0.4  | 1.00E+18 | 1.530 | 812.114 |
| 9.00E+15 | 0.45 | 0.15 | 3.00E+17 | 0.649 | 71.983  |
| 9.00E+15 | 0.45 | 0.15 | 4.00E+17 | 0.700 | 91.105  |
| 9.00E+15 | 0.45 | 0.15 | 5.00E+17 | 0.775 | 113.386 |
| 9.00E+15 | 0.45 | 0.15 | 6.00E+17 | 0.825 | 138.859 |
| 9.00E+15 | 0.45 | 0.15 | 7.00E+17 | 0.858 | 167.391 |
| 9.00E+15 | 0.45 | 0.15 | 8.00E+17 | 0.870 | 198.919 |
| 9.00E+15 | 0.45 | 0.15 | 9.00E+17 | 0.880 | 233.305 |
| 9.00E+15 | 0.45 | 0.15 | 1.00E+18 | 0.895 | 269.550 |
| 9.00E+15 | 0.45 | 0.2  | 3.00E+17 | 0.783 | 92.596  |
| 9.00E+15 | 0.45 | 0.2  | 4.00E+17 | 0.880 | 124.341 |
| 9.00E+15 | 0.45 | 0.2  | 5.00E+17 | 0.907 | 161.935 |
| 9.00E+15 | 0.45 | 0.2  | 6.00E+17 | 0.956 | 205.125 |
| 9.00E+15 | 0.45 | 0.2  | 7.00E+17 | 0.971 | 253.435 |
| 9.00E+15 | 0.45 | 0.2  | 8.00E+17 | 0.995 | 303.524 |
| 9.00E+15 | 0.45 | 0.2  | 9.00E+17 | 1.017 | 353.544 |
| 9.00E+15 | 0.45 | 0.2  | 1.00E+18 | 1.034 | 403.745 |
| 9.00E+15 | 0.45 | 0.25 | 3.00E+17 | 0.926 | 115.547 |
| 9.00E+15 | 0.45 | 0.25 | 4.00E+17 | 1.023 | 161.471 |

|          |      |      |          |       |         |
|----------|------|------|----------|-------|---------|
| 9.00E+15 | 0.45 | 0.25 | 5.00E+17 | 1.057 | 216.197 |
| 9.00E+15 | 0.45 | 0.25 | 6.00E+17 | 1.099 | 277.727 |
| 9.00E+15 | 0.45 | 0.25 | 7.00E+17 | 1.107 | 339.992 |
| 9.00E+15 | 0.45 | 0.25 | 8.00E+17 | 1.145 | 402.347 |
| 9.00E+15 | 0.45 | 0.25 | 9.00E+17 | 1.167 | 464.719 |
| 9.00E+15 | 0.45 | 0.25 | 1.00E+18 | 1.185 | 527.057 |
| 9.00E+15 | 0.45 | 0.3  | 3.00E+17 | 1.068 | 141.192 |
| 9.00E+15 | 0.45 | 0.3  | 4.00E+17 | 1.165 | 203.343 |
| 9.00E+15 | 0.45 | 0.3  | 5.00E+17 | 1.206 | 276.013 |
| 9.00E+15 | 0.45 | 0.3  | 6.00E+17 | 1.240 | 350.398 |
| 9.00E+15 | 0.45 | 0.3  | 7.00E+17 | 1.291 | 424.667 |
| 9.00E+15 | 0.45 | 0.3  | 8.00E+17 | 1.314 | 499.015 |
| 9.00E+15 | 0.45 | 0.3  | 9.00E+17 | 1.331 | 573.394 |
| 9.00E+15 | 0.45 | 0.3  | 1.00E+18 | 1.345 | 647.570 |
| 9.00E+15 | 0.45 | 0.35 | 3.00E+17 | 1.215 | 169.268 |
| 9.00E+15 | 0.45 | 0.35 | 4.00E+17 | 1.322 | 249.236 |
| 9.00E+15 | 0.45 | 0.35 | 5.00E+17 | 1.393 | 335.258 |
| 9.00E+15 | 0.45 | 0.35 | 6.00E+17 | 1.427 | 421.325 |
| 9.00E+15 | 0.45 | 0.35 | 7.00E+17 | 1.474 | 507.446 |
| 9.00E+15 | 0.45 | 0.35 | 8.00E+17 | 1.501 | 593.421 |
| 9.00E+15 | 0.45 | 0.35 | 9.00E+17 | 1.523 | 568.886 |
| 9.00E+15 | 0.45 | 0.35 | 1.00E+18 | 1.558 | 765.080 |
| 9.00E+15 | 0.45 | 0.4  | 3.00E+17 | 1.383 | 200.031 |
| 9.00E+15 | 0.45 | 0.4  | 4.00E+17 | 1.511 | 295.996 |
| 9.00E+15 | 0.45 | 0.4  | 5.00E+17 | 1.602 | 393.670 |
| 9.00E+15 | 0.45 | 0.4  | 6.00E+17 | 1.650 | 491.226 |
| 9.00E+15 | 0.45 | 0.4  | 7.00E+17 | 1.684 | 588.903 |
| 9.00E+15 | 0.45 | 0.4  | 8.00E+17 | 1.715 | 686.339 |
| 9.00E+15 | 0.45 | 0.4  | 9.00E+17 | 1.776 | 783.745 |
| 9.00E+15 | 0.45 | 0.4  | 1.00E+18 | 1.814 | 878.669 |
| 9.00E+15 | 0.5  | 0.15 | 3.00E+17 | 0.670 | 150.519 |
| 9.00E+15 | 0.5  | 0.15 | 4.00E+17 | 0.728 | 180.825 |
| 9.00E+15 | 0.5  | 0.15 | 5.00E+17 | 0.825 | 200.088 |
| 9.00E+15 | 0.5  | 0.15 | 6.00E+17 | 0.885 | 219.830 |
| 9.00E+15 | 0.5  | 0.15 | 7.00E+17 | 0.928 | 232.942 |
| 9.00E+15 | 0.5  | 0.15 | 8.00E+17 | 0.947 | 249.588 |
| 9.00E+15 | 0.5  | 0.15 | 9.00E+17 | 0.966 | 402.380 |
| 9.00E+15 | 0.5  | 0.15 | 1.00E+18 | 0.984 | 446.119 |
| 9.00E+15 | 0.5  | 0.2  | 3.00E+17 | 0.826 | 190.383 |
| 9.00E+15 | 0.5  | 0.2  | 4.00E+17 | 0.947 | 246.374 |
| 9.00E+15 | 0.5  | 0.2  | 5.00E+17 | 1.025 | 305.903 |
| 9.00E+15 | 0.5  | 0.2  | 6.00E+17 | 1.050 | 367.977 |
| 9.00E+15 | 0.5  | 0.2  | 7.00E+17 | 1.084 | 427.655 |
| 9.00E+15 | 0.5  | 0.2  | 8.00E+17 | 1.104 | 487.716 |
| 9.00E+15 | 0.5  | 0.2  | 9.00E+17 | 1.128 | 547.439 |
| 9.00E+15 | 0.5  | 0.2  | 1.00E+18 | 1.150 | 607.415 |
| 9.00E+15 | 0.5  | 0.25 | 3.00E+17 | 1.009 | 236.246 |
| 9.00E+15 | 0.5  | 0.25 | 4.00E+17 | 1.128 | 308.914 |
| 9.00E+15 | 0.5  | 0.25 | 5.00E+17 | 1.185 | 386.394 |
| 9.00E+15 | 0.5  | 0.25 | 6.00E+17 | 1.223 | 461.528 |
| 9.00E+15 | 0.5  | 0.25 | 7.00E+17 | 1.263 | 537.128 |
| 9.00E+15 | 0.5  | 0.25 | 8.00E+17 | 1.299 | 611.997 |
| 9.00E+15 | 0.5  | 0.25 | 9.00E+17 | 1.322 | 687.745 |
| 9.00E+15 | 0.5  | 0.25 | 1.00E+18 | 1.354 | 762.409 |
| 9.00E+15 | 0.5  | 0.3  | 3.00E+17 | 1.205 | 279.639 |
| 9.00E+15 | 0.5  | 0.3  | 4.00E+17 | 1.300 | 307.467 |
| 9.00E+15 | 0.5  | 0.3  | 5.00E+17 | 1.385 | 462.531 |
| 9.00E+15 | 0.5  | 0.3  | 6.00E+17 | 1.407 | 552.675 |

|          |     |      |          |       |          |
|----------|-----|------|----------|-------|----------|
| 9.00E+15 | 0.5 | 0.3  | 7.00E+17 | 1.470 | 643.275  |
| 9.00E+15 | 0.5 | 0.3  | 8.00E+17 | 1.504 | 733.219  |
| 9.00E+15 | 0.5 | 0.35 | 3.00E+17 | 1.372 | 323.862  |
| 9.00E+15 | 0.5 | 0.35 | 4.00E+17 | 1.503 | 430.836  |
| 9.00E+15 | 0.5 | 0.35 | 5.00E+17 | 1.613 | 536.210  |
| 9.00E+15 | 0.5 | 0.35 | 6.00E+17 | 1.658 | 641.040  |
| 9.00E+15 | 0.5 | 0.35 | 7.00E+17 | 1.710 | 746.073  |
| 9.00E+15 | 0.5 | 0.35 | 8.00E+17 | 1.741 | 849.622  |
| 9.00E+15 | 0.5 | 0.35 | 9.00E+17 | 1.778 | 951.377  |
| 9.00E+15 | 0.5 | 0.4  | 3.00E+17 | 1.593 | 369.671  |
| 9.00E+15 | 0.5 | 0.4  | 4.00E+17 | 1.744 | 488.852  |
| 9.00E+15 | 0.5 | 0.4  | 5.00E+17 | 1.910 | 608.359  |
| 9.00E+15 | 0.5 | 0.4  | 6.00E+17 | 1.942 | 727.699  |
| 9.00E+15 | 0.5 | 0.4  | 7.00E+17 | 2.002 | 845.900  |
| 9.00E+15 | 0.5 | 0.4  | 8.00E+17 | 2.047 | 961.737  |
| 9.00E+15 | 0.5 | 0.4  | 9.00E+17 | 2.104 | 1074.390 |
| 9.00E+15 | 0.5 | 0.4  | 1.00E+18 | 2.171 | 1178.570 |
| 9.00E+15 | 0.6 | 0.15 | 3.00E+17 | 0.717 | 159.669  |
| 9.00E+15 | 0.6 | 0.15 | 4.00E+17 | 0.784 | 197.747  |
| 9.00E+15 | 0.6 | 0.15 | 5.00E+17 | 0.932 | 242.243  |
| 9.00E+15 | 0.6 | 0.15 | 6.00E+17 | 1.035 | 289.226  |
| 9.00E+15 | 0.6 | 0.15 | 7.00E+17 | 1.106 | 317.337  |
| 9.00E+15 | 0.6 | 0.15 | 8.00E+17 | 1.157 | 339.628  |
| 9.00E+15 | 0.6 | 0.15 | 9.00E+17 | 1.184 | 357.172  |
| 9.00E+15 | 0.6 | 0.15 | 1.00E+18 | 1.213 | 372.624  |
| 9.00E+15 | 0.6 | 0.2  | 3.00E+17 | 0.949 | 203.220  |
| 9.00E+15 | 0.6 | 0.2  | 4.00E+17 | 1.129 | 265.312  |
| 9.00E+15 | 0.6 | 0.2  | 5.00E+17 | 1.263 | 332.161  |
| 9.00E+15 | 0.6 | 0.2  | 6.00E+17 | 1.315 | 396.623  |
| 9.00E+15 | 0.6 | 0.2  | 7.00E+17 | 1.359 | 461.493  |
| 9.00E+15 | 0.6 | 0.2  | 8.00E+17 | 1.408 | 525.855  |
| 9.00E+15 | 0.6 | 0.2  | 9.00E+17 | 1.452 | 590.593  |
| 9.00E+15 | 0.6 | 0.25 | 3.00E+17 | 1.249 | 252.651  |
| 9.00E+15 | 0.6 | 0.25 | 4.00E+17 | 1.420 | 336.473  |
| 9.00E+15 | 0.6 | 0.25 | 5.00E+17 | 1.563 | 417.657  |
| 9.00E+15 | 0.6 | 0.25 | 6.00E+17 | 1.586 | 499.249  |
| 9.00E+15 | 0.6 | 0.25 | 7.00E+17 | 1.658 | 580.857  |
| 9.00E+15 | 0.6 | 0.25 | 8.00E+17 | 1.727 | 662.479  |
| 9.00E+15 | 0.6 | 0.25 | 9.00E+17 | 1.765 | 743.940  |
| 9.00E+15 | 0.6 | 0.25 | 1.00E+18 | 1.801 | 824.596  |
| 9.00E+15 | 0.6 | 0.3  | 3.00E+17 | 1.534 | 303.272  |
| 9.00E+15 | 0.6 | 0.3  | 4.00E+17 | 1.717 | 403.384  |
| 9.00E+15 | 0.6 | 0.3  | 5.00E+17 | 1.878 | 501.664  |
| 9.00E+15 | 0.6 | 0.3  | 6.00E+17 | 1.947 | 507.207  |
| 9.00E+15 | 0.6 | 0.3  | 7.00E+17 | 2.036 | 697.916  |
| 9.00E+15 | 0.6 | 0.3  | 8.00E+17 | 2.099 | 795.282  |
| 9.00E+15 | 0.6 | 0.3  | 9.00E+17 | 2.144 | 892.508  |
| 9.00E+15 | 0.6 | 0.3  | 1.00E+18 | 2.180 | 986.931  |
| 9.00E+15 | 0.6 | 0.35 | 3.00E+17 | 1.845 | 354.686  |
| 9.00E+15 | 0.6 | 0.35 | 4.00E+17 | 2.075 | 468.652  |
| 9.00E+15 | 0.6 | 0.35 | 5.00E+17 | 2.372 | 582.929  |
| 9.00E+15 | 0.6 | 0.35 | 6.00E+17 | 2.401 | 697.271  |
| 9.00E+15 | 0.6 | 0.35 | 8.00E+17 | 2.570 | 924.294  |
| 9.00E+15 | 0.6 | 0.35 | 9.00E+17 | 2.660 | 1033.760 |
| 9.00E+15 | 0.6 | 0.35 | 1.00E+18 | 2.753 | 1139.480 |
| 9.00E+15 | 0.6 | 0.4  | 3.00E+17 | 2.225 | 402.986  |
| 9.00E+15 | 0.6 | 0.4  | 4.00E+17 | 2.531 | 533.182  |
| 9.00E+15 | 0.6 | 0.4  | 5.00E+17 | 2.925 | 663.342  |

|          |     |     |          |       |          |
|----------|-----|-----|----------|-------|----------|
| 9.00E+15 | 0.6 | 0.4 | 6.00E+17 | 2.981 | 793.437  |
| 9.00E+15 | 0.6 | 0.4 | 7.00E+17 | 3.110 | 922.080  |
| 9.00E+15 | 0.6 | 0.4 | 9.00E+17 | 3.391 | 1168.330 |
| 9.00E+15 | 0.6 | 0.4 | 1.00E+18 | 3.499 | 1277.210 |
